# Supplementary material for: Development of an asymmetric formal synthesis of (−)-quinagolideviaenzymatic resolution and stereoselective iminium ion reduction
Source: Royal Society of Chemistry journal article supplement (doi:10.1039/d3ob00946g), 2023-01-01
Supplement: d3ob00946g1.pdf [file d3ob00946g1.pdf]

## Electronic Supporting Information:

# Development of an Asymmetric Formal Synthesis of (-)- Quinagolide via Enzymatic Resolution and Stereoselective Iminium Ion Reduction

Lucrezia Margherita Comparini<sup>a</sup>, Andrea Menichetti<sup>a</sup>, Lucilla Favero<sup>a</sup>, Sebastiano Di Pietro<sup>a</sup>, Fabrizio Badalassi<sup>b</sup>, Per Ryberg<sup>b\*</sup> and Mauro Pineschi<sup>a\*</sup>

<sup>a</sup> Department of Pharmacy, University of Pisa, Via Bonanno 33, 56126 Pisa, Italy. Tel: +390502219668. Fax: +390502219660.

Corresponding author: e-mail: [mauro.pineschi@unipi.it](mailto:mauro.pineschi@unipi.it).

<sup>b</sup> Chemical Development, Global Pharmaceutical R&D, Ferring Pharmaceuticals A/S, Kay Fiskers Plads 11, DK-2300 Copenhagen S.

Corresponding author: e-mail: [per.ryberg@ferring.com](mailto:per.ryberg@ferring.com)

### Summary:

|                                                                               |    |
|-------------------------------------------------------------------------------|----|
| Materials and Methods .....                                                   | 1  |
| Screening of reductive reaction conditions of ([3R, 4aS,R)-(2). .....         | 1  |
| General procedure for the screening of catalysts for ATH:.....                | 2  |
| Screening of conditions for the reduction of (2) with metal borohydride:..... | 3  |
| Screening of enzymes for the enzymatic kinetic resolution of (8a) .....       | 5  |
| Optimized synthesis of the intermediates: .....                               | 9  |
| Bibliography: .....                                                           | 13 |
| CSP-HPLC traces: .....                                                        | 14 |
| Copies of <sup>1</sup> H NMR and <sup>13</sup> C NMR spectra: .....           | 19 |
| Computational section: .....                                                  | 25 |
| Bibliography: .....                                                           | 25 |

## Materials and Methods:

All reagents were purchased from commercially available sources. Solvents for extraction and chromatography were distilled before use. Anhydrous MeOH was obtained by distillation on Mg turnings. Protease from *Bacillus licheniformis* (P4860 >2.4 U/g) has been purchased by Sigma-Aldrich. A particular kind of NaBH<sub>4</sub> powder (>98% purity) purchased by Sigma-Aldrich was used for entry 13 of Table 1. Analytical TLC were performed on silica gel on TLC Al foils (Sigma-Aldrich) with detection by exposure to ultraviolet light (254 nm) and/or by immersion in an acidic staining solution of vanillin in EtOH. Merck silica gel 60 (230-400 mesh) was used for flash chromatography. Semipreparative TLC were performed on Merck PLC silica gel 60. Molecular sieves AW-300 (Alfa Aesar), 4 Å (SigmaAldrich) used were activated under vacuum by heating with a drying pistol. All compounds have been characterized using one-dimensional and bidimensional NMR spectroscopic techniques, respectively <sup>1</sup>H, <sup>13</sup>C and HSQC, HMBC, NOESY/ROESY and COSY. NMR spectra were recorded on Bruker Avance II 400 spectrometer, dissolving the compounds in appropriate deuterated solvents. <sup>1</sup>H NMR spectra were recorded on Bruker Avance II 400 MHz spectrometer. Chemical shifts are reported in ppm downfield from tetramethylsilane with the solvent resonance as the internal standard (Chloroform-d: δ 7.26). Signal patterns are indicated as follows: br s, broad singlet; s, singlet; d, doublet; t, triplet; q, quartet; m, multiplet. Coupling constants (*J*) are given in hertz (Hz). <sup>13</sup>C NMR spectra were recorded at 101 MHz with complete proton decoupling. Chemical shifts are reported in ppm downfield from tetramethylsilane with the solvent resonance as the internal standard (Chloroform-d: δ 77.16). Melting points were determined on a Kofler apparatus and are uncorrected. HRESIMS were acquired in positive ion mode with Orbitrap high-resolution mass spectrometer (Thermo, San Jose, CA, USA), equipped with H-ESI source. Analytical high performance liquid chromatography (HPLC) was performed on a Waters 600E equipped with Varian Prostar 325 detector using a Daicel® Chiralpak AD-H (250 X 4.6 mm) columns with detection at 220 nm.

## Screening of reductive reaction conditions of ([3R, 4aS,R]-**2**).

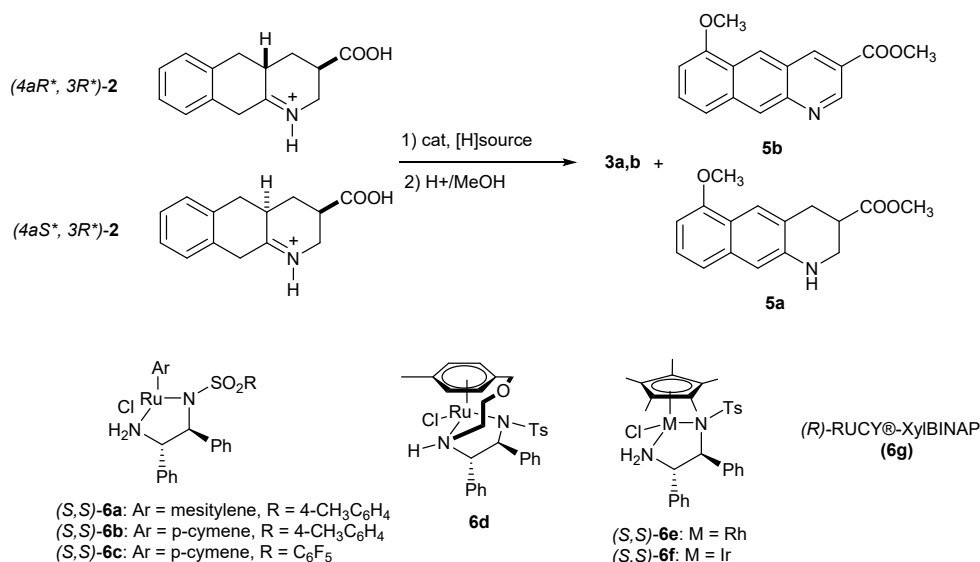

**Scheme S-1.** Screening conditions for asymmetric reduction of cyclic iminium ion (**2**).

**Table S-1.** Screening of reductive reaction conditions of (**3R**, **4aS,R**)-(**2**).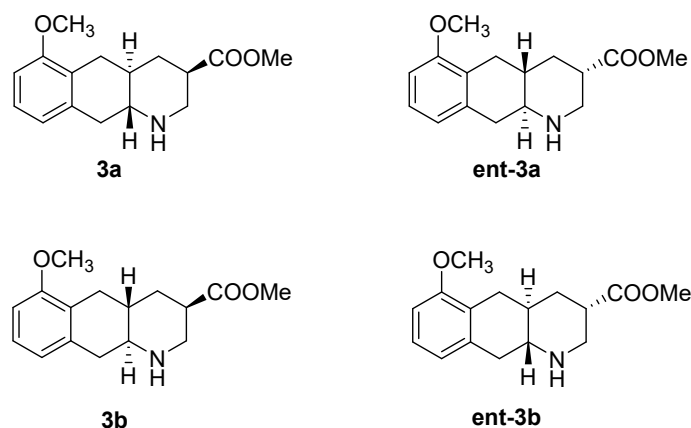

| entry <sup>a</sup> | catalyst  | [H] source          | Yield <sup>b</sup>                                                   | ee <sup>c</sup>                  |
|--------------------|-----------|---------------------|----------------------------------------------------------------------|----------------------------------|
| 1                  | <b>6a</b> | HCOONH <sub>4</sub> | <b>3a</b> (28%), <b>3b</b> (11%), <b>5a</b> (25%), <b>5b</b> (8%)    | <b>3a</b> (28%), <b>3b</b> (15%) |
| 2                  | <b>6b</b> | HCOONH <sub>4</sub> | <b>3a</b> (38%), <b>3b</b> (11%), <b>5a</b> (19%), <b>5b</b> (6%)    | <b>3a</b> (32%), <b>3b</b> (12%) |
| 3                  | <b>6c</b> | HCOONH <sub>4</sub> | <b>3a</b> (31%), <b>3b</b> (13%), <b>5a</b> (26%), <b>5b</b> (1%)    | <b>3a</b> (44%), <b>3b</b> (10%) |
| 4                  | <b>6d</b> | HCOONH <sub>4</sub> | <b>3a</b> (25%), <b>3b</b> (14%), <b>5a</b> (16%), <b>5b</b> (3%)    | <b>3a</b> (46%), <b>3b</b> (40%) |
| 5                  | <b>6g</b> | HCOONH <sub>4</sub> | <b>3a</b> (<5%), <b>3b</b> (<5%), <b>5a</b> (45%), <b>5b</b> (9%)    | Nd                               |
| 6                  | <b>6e</b> | HCOONH <sub>4</sub> | complex                                                              | mixture                          |
| 7                  | <b>6f</b> | HCOONH <sub>4</sub> | complex                                                              | mixture                          |
| 8                  | <b>6b</b> | HCOONa              | <b>3a</b> (29%), <b>3b</b> (19%), <b>5a</b> (8%), <b>5b</b> (3%)     | <b>3a</b> (25%), <b>3b</b> (10%) |
| 9 <sup>d</sup>     | <b>6b</b> | H <sub>2</sub>      | <b>3a</b> ( <i>ent-3a</i> ) (28%), <b>3b</b> ( <i>ent-3b</i> ) (11%) | <b>3a</b> (rac), <b>3b</b> (rac) |
| 10 <sup>e</sup>    | (S)-CBS   | BH <sub>3</sub>     | <b>3a</b> (33%), <b>3b</b> (57%)                                     | <b>3a</b> (4%), <b>3b</b> (2%)   |
| 11 <sup>f</sup>    | -         | NaBH <sub>4</sub>   | <b>3a</b> ( <i>ent-3a</i> ) (48%), <b>3b</b> ( <i>ent-3b</i> ) (32%) | N/A                              |
| 12 <sup>g</sup>    | -         | NaBH <sub>4</sub>   | <b>3a</b> ( <i>ent-3a</i> ) (47%), <b>3b</b> ( <i>ent-3b</i> ) (30%) | N/A                              |
| 13 <sup>h</sup>    | -         | NaBH <sub>4</sub>   | <b>3a</b> ( <i>ent-3a</i> ) (72%), <b>3b</b> ( <i>ent-3b</i> ) (8%)  | N/A                              |
| 14 <sup>i</sup>    | -         | NaBH <sub>4</sub>   | <b>3a</b> ( <i>ent-3a</i> ) (66%), <b>3b</b> ( <i>ent-3b</i> ) (14%) | N/A                              |
| 15 <sup>j</sup>    | -         | NaBH <sub>4</sub>   | <b>3a</b> ( <i>ent-3a</i> ) (49%), <b>3b</b> ( <i>ent-3b</i> ) (16%) | N/A                              |
| 16 <sup>k</sup>    | -         | LiBH <sub>4</sub>   | <b>3a</b> ( <i>ent-3a</i> ) (68%), <b>3b</b> ( <i>ent-3b</i> ) (12%) | N/A                              |

a) Unless noted otherwise, all ATH (asymmetric transfer hydrogenation) reactions were carried out in MeOH with 6.0 equiv. of HCOONH<sub>4</sub> or HCOONa at 60 °C for 3.5 hours. b) NMR yield using 1-bromo-3-chlorobenzene as internal standard. c) Values determined by HPLC on Daicel Chiralcel AD-H on the corresponding acetamide. d) Reaction carried out at 2 bar of H<sub>2</sub> at 60 °C in MeOH for 15h. e) Reaction carried out in THF with methyl ester of compound **2** at 0 °C for 1h. f) Technical grade NaBH<sub>4</sub>. g) NaBH<sub>4</sub> (granules >99.99% purity) in anhydrous MeOH. h) NaBH<sub>4</sub> powder (>98% purity), Aldrich SKU 452882. i) Conditions g + MgCl<sub>2</sub> (20 mol%). j) Conditions g + LiCl (20 mol%). k) LiBH<sub>4</sub> (1.5 equiv) in anhydrous MeOH. N/A = not applicable.

### General procedure for the screening of catalysts for ATH:

**Method A: (2)** (0,30 mmol) was added in a Schlenk-tube in argon atmosphere and dissolved in HPLC grade MeOH (1.5 mL), catalyst (2 mol%) was added. After stirring for 5 minutes, [H] source (6.0 eq) was added and the reaction mixture was heated to 60°C. The reaction was stirred at the same temperature until complete conversion of **2**, then is cooled to r.t. and a solution of H<sub>2</sub>SO<sub>4</sub> in MeOH (2.64M, 0.5 mL) was dropwise added. The mixture was refluxed for 3.5h, then cooled again to r.t. and quenched with water (3 mL), Na<sub>2</sub>CO<sub>3</sub> was added to reach pH>7. The biphasic mixture was extracted with DCM (10 mLx3). The organic phase was dried over Na<sub>2</sub>SO<sub>4</sub>, filtered, and then the solvents were evaporated under reduced pressure affording the desired product as a dark brown oil.

**Method B: (2)** (1.7mmol) was added in a round-bottomed flask in argon atmosphere, RuCl[(S,S)-TsDPEN](*p*-cymene) (2 mol%, 0.02 mmol), and MeOH (18mL) were then added. After stirring at r.t. for 10 minutes, the mixture was transferred in an autoclave and 2 bar of H<sub>2</sub> at 60°C were added for 18h. After cooling to r.t., the mixture was concentrated under reduced pressure and a solution of H<sub>2</sub>SO<sub>4</sub> in MeOH (2.64M, 3 mL) was dropwise added, the mixture was then refluxed for 3.5h. The mixture was allowed to cool down to room temperature, MeOH was partially evaporated under reduced pressure, and the mixture was quenched with water (18 mL), Na<sub>2</sub>CO<sub>3</sub> was added to reach pH>7 and then the biphasic mixture was extracted with DCM (20 mLx3). The organic phase was dried over Na<sub>2</sub>SO<sub>4</sub>, filtered, and then the solvent were evaporated under reduced pressure affording the desired product as a dark brown oil.

Entry 10: Step 1) In a round-bottomed flask in argon atmosphere DCC (3.4 mmol, 703 mg) and DMAP (0.31 mmol, 38 mg) are added to a solution of DCM (18 mL) and MeOH (1.25 mL, 10 eq), then compound **(2)** (3.1 mmol, 1 g) is added. The reaction mixture is stirred a r.t. for 2h, then filtered under vacuum on silica gel pad and washed with 40 mL of a solution of DCM:MeOH=9:1. The crude brown solid is solubilized in Et<sub>2</sub>O and CHCl<sub>3</sub> and then is filtered under vacuum, a dark yellow solid is obtained (crude 1.24 mmol, 339.8 mg). Step 2) Methyl ester of compound **(2)** (93 mg, 0.3 mmol) was dissolved in dry THF (3.3 mL), CBS in toluene (10 mol%, 0.03 mmol, 8.3 mg, 9 mL) was added at 0°C, and the mixture was stirred for 10 minutes, BH<sub>3</sub> (1.1 eq, 0.33 mmol, 29 mL) was added and the mixture was stirred for 1h. MeOH (3 mL) and the reaction is stirred for further 30 minutes, NaHCO<sub>3(sat)</sub> is added to pH>7 and then extracted with AcOEt (10 mLx3), the organic phase is washed with Brine (10 mL), the organic phase is dried over Na<sub>2</sub>SO<sub>4</sub>, the filtered, and the organic solvents are evaporated under reduced pressure, the crude is a brown sticky oil (crude 83 mg).

#### **Screening of conditions for the reduction of (2) with metal borohydride:**

**General procedure:** **(2)** (1.0 eq) was added in a Schlenk-tube in argon atmosphere and dissolved in HPLC grade MeOH. The solution was cooled to -75°C, the metal borohydride (1.5 eq) was mixed with the additive 20 mol% and the mixture was portion-wise added. The reaction was left under vigorous stirring for 2h at -70°C, then the cooling bath was removed and a solution of H<sub>2</sub>SO<sub>4</sub> in MeOH (0.64 M) was dropwise added to the mixture at -20°C, the reaction was then refluxed for 3.5h. The mixture was allowed to cool down to room temperature and then was quenched with water (3 mL), Na<sub>2</sub>CO<sub>3</sub> was added to reach pH>7 and then the biphasic mixture was extracted with DCM. The organic phase was dried over Na<sub>2</sub>SO<sub>4</sub>, filtered, and then the solvents were evaporated under reduced pressure affording the desired product as a dark yellow oil.

Entry 11: **(2)** (100 mg, 0.34 mmol) was added in a Schlenk-tube in argon atmosphere and dissolved in HPLC grade MeOH (2 mL). The solution was cooled to -75°C, and technical grade NaBH<sub>4</sub> (1.5 eq, 0.51 mmol, 19.2 mg) was portion-wise added. The reaction was left under vigorous stirring for 2h at -70°C, then the cooling bath was removed and a solution of H<sub>2</sub>SO<sub>4</sub> in MeOH (0.5 mL, 0.64 M) was dropwise added to the mixture at -20°C, the reaction was then refluxed for 3.5h. The mixture was allowed to cool down to room temperature and then was quenched with water (3 mL), Na<sub>2</sub>CO<sub>3</sub> was added to reach pH>7 and then the biphasic mixture was extracted with DCM (10 mLx3). The organic phase was dried over Na<sub>2</sub>SO<sub>4</sub>, filtered, and then the solvents were evaporated under reduced pressure affording the desired product as a dark yellow oil (crude 72.3 mg, dr: 60/40).

Entry 12: **(2)** (100 mg, 0.34 mmol) was added in a Schlenk-tube in argon atmosphere and dissolved in HPLC grade MeOH (2 mL). The solution was cooled to -75°C, NaBH<sub>4</sub> (99.99% purity)(1.5 eq, 0.51 mmol, 19.2 mg) was portion-wise added. The reaction was left under vigorous stirring for 2h at -70°C, then the cooling bath was removed and a solution of H<sub>2</sub>SO<sub>4</sub> in MeOH (0.5 mL, 0.64 M) was dropwise added to the mixture at -20°C, the reaction was then refluxed for 3.5h. The mixture was allowed to cool down to room temperature and then was quenched with water (3 mL), Na<sub>2</sub>CO<sub>3</sub> was added to reach pH>7 and then the biphasic mixture was extracted with DCM (10 mLx3). The organic phase was dried over Na<sub>2</sub>SO<sub>4</sub>, filtered, and then the solvents were

evaporated under reduced pressure affording the desired product as a dark yellow oil (crude 79 mg, dr: 60/40).

Entry 13: **(2)** (100 mg, 0.34 mmol) was added in a Schlenk-tube in argon atmosphere and dissolved in HPLC grade MeOH (2 mL). The solution was cooled to  $-75^{\circ}\text{C}$ ,  $\text{NaBH}_4$  (98% purity, Aldrich SKU 452882.) (1.5 eq, 0.51 mmol, 19.2 mg) was portion-wise added. The reaction was left under vigorous stirring for 2h at  $-70^{\circ}\text{C}$ , then the cooling bath was removed and a solution of  $\text{H}_2\text{SO}_4$  in MeOH (0.5 mL, 0.64 M) was dropwise added to the mixture at  $-20^{\circ}\text{C}$ , the reaction was then refluxed for 3.5h. The mixture was allowed to cool down to room temperature and then was quenched with water (3 mL),  $\text{Na}_2\text{CO}_3$  was added to reach  $\text{pH}>7$  and then the biphasic mixture was extracted with DCM (10 mLx3). The organic phase was dried over  $\text{Na}_2\text{SO}_4$ , filtered, and then the solvents were evaporated under reduced pressure affording the desired product as a dark yellow oil (crude 76 mg, dr: 90/10).

Entry 14: **(2)** (100 mg, 0.34 mmol) was added in a Schlenk-tube in argon atmosphere and dissolved in HPLC grade MeOH (2 mL). The solution was cooled to  $-75^{\circ}\text{C}$ ,  $\text{NaBH}_4$  (99.99% purity) (1.5 eq, 0.51 mmol, 19.2 mg) was mixed with dry  $\text{MgCl}_2$  (20 mol%, 6.47 mg) and portion-wise added. The reaction was left under vigorous stirring for 2h at  $-70^{\circ}\text{C}$ , then the cooling bath was removed and a solution of  $\text{H}_2\text{SO}_4$  in MeOH (0.5 mL, 0.64 M) was dropwise added to the mixture at  $-20^{\circ}\text{C}$ , the reaction was then refluxed for 3.5h. The mixture was allowed to cool down to room temperature and then was quenched with water (3 mL),  $\text{Na}_2\text{CO}_3$  was added to reach  $\text{pH}>7$  and then the biphasic mixture was extracted with DCM (10 mLx3). The organic phase was dried over  $\text{Na}_2\text{SO}_4$ , filtered, and then the solvents were evaporated under reduced pressure affording the desired product as a dark yellow oil (crude 82 mg, dr: 80/20).

Entry 15: **(2)** (200 mg, 0.68 mmol) was added in a Schlenk-tube in argon atmosphere and dissolved in HPLC grade MeOH (4 mL). The solution was cooled to  $-75^{\circ}\text{C}$ ,  $\text{NaBH}_4$  (99.99% purity) (1.5 eq, 1.02 mmol, 38.5 mg) was mixed with dry  $\text{LiCl}$  (20 mol%, 5.7 mg) was portion-wise added. The reaction was left under vigorous stirring for 2h at  $-70^{\circ}\text{C}$ , then the cooling bath was removed and a solution of  $\text{H}_2\text{SO}_4$  in MeOH (0.5 mL, 0.64 M) was dropwise added to the mixture at  $-20^{\circ}\text{C}$ , the reaction was then refluxed for 3.5h. The mixture was allowed to cool down to room temperature and then was quenched with water (3 mL),  $\text{Na}_2\text{CO}_3$  was added to reach  $\text{pH}>7$  and then the biphasic mixture was extracted with DCM (10 mLx3). The organic phase was dried over  $\text{Na}_2\text{SO}_4$ , filtered, and then the solvents were evaporated under reduced pressure affording the desired product as a dark yellow oil (crude 112 mg, dr: 80/20).

## Screening of enzymes for the enzymatic kinetic resolution of (**8a**)

Table S-2. Screening of enzymes for the enzymatic kinetic resolution of (**8a**).

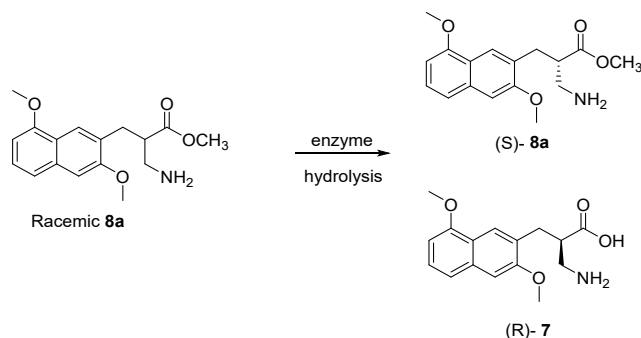

| Entry | Enzyme                                                  | Solvent                             | Temp. (°C) | Time     | Conversion <sup>a</sup> | ee% (starting material) <sup>b</sup> | E <sup>c</sup> |
|-------|---------------------------------------------------------|-------------------------------------|------------|----------|-------------------------|--------------------------------------|----------------|
| 1     | <i>Protease from bacillus amiloliquefaciens</i>         | Phosphate buffer pH=7               | 37         | 5 days   | 10%                     | 1.7%                                 | nd             |
| 2     | <i>Protease from bacillus species</i>                   | Phosphate buffer pH=7               | 40         | 21 hours | 49%                     | 52.6%                                | 12             |
| 3     | <i>Protease type XIII aspergillus saitoi</i>            | Phosphate buffer pH=7               | 37         | 48 hours | <5%                     | 0.2%                                 | nd             |
| 4     | <i>Lipase B Candida antarctica</i>                      | <i>n</i> -Hexane/H <sub>2</sub> O   | 45         | 48 hours | <5%                     | 2.1%                                 | nd             |
| 5     | <i>Lipase A Candida antarctica</i>                      | CH <sub>3</sub> CN/H <sub>2</sub> O | 45         | 5 days   | <5%                     | 0.8%                                 | nd             |
| 6     | <i>Lipase B Candida antarctica</i>                      | Acetone/H <sub>2</sub> O            | 37         | 24 hours | 46%                     | 0.1%                                 | nd             |
| 7     | <i>Lipase A Candida antarctica</i>                      | CH <sub>3</sub> CN/H <sub>2</sub> O | 37         | 18 hours | 58%                     | 0%                                   | nd             |
| 8     | <i>Trypsin tpck treated from bovine pancreas</i>        | Phosphate buffer pH=7               | r.t.       | 3 days   | 14%                     | 0.7%                                 | nd             |
| 9     | <i>Protease from bacillus streptomices griseus</i>      | Carbonate buffer pH=9.7             | r.t.       | 52 hours | 40%                     | 0.3%                                 | nd             |
| 10    | <i>Alcalase from bacillus licheniformis<sup>d</sup></i> | Phosphate buffer pH=7               | 37         | 24 hours | 47%                     | 73.6%                                | 23.6           |
| 11    | <i>Protease from bacillus licheniformis<sup>e</sup></i> | Phosphate buffer pH=7               | 37         | 24 hours | 49%                     | 98.2%                                | >300           |
| 12    | <i>Protease from bacillus amiloliquefaciens</i>         | Phosphate buffer pH=9               | 60         | 5 days   | 18%                     | 1.2%                                 | nd             |
| 13    | <i>Protease from bovine pancreas Type I</i>             | Phosphate buffer pH=7               | 37         | 7h       | 50%                     | 90.3%                                | 60.7           |
| 14    | <i>Lipase from Candida rugosa (powder)</i>              | Phosphate buffer pH=7/Acetone (5:1) | r.t.       | 72h      | <10%                    | n.d                                  | nd             |
| 15    | <i>Protease from bacillus licheniformis<sup>e</sup></i> | Phosphate buffer pH=7               | 37         | 48h      | 50%                     | >99%                                 | >300           |

a) Conversion calculated using HPLC on Luna C8 stationary phase. b) Enantiomeric excess calculated on the acetamide of unreacted **8a** using Daicel Chiralcel AD-H column (eluant heptane/IPA 88/12, retention times were 17.5' (major) 18.5 (minor). c) Stereoselectivity

factor evaluated using  $\ln[(0-c)(1-ee)]/\ln[(0-c)(1+ee)]$ . d) ALCALASE enzyme, *Bacillus licheniformis*, Merck-Aldrich 126741. e) Protease from *Bacillus licheniformis* > 2.4U/g, Aldrich P 4860. (r.t. = room temperature; n.d. = not determined).

Entry 1: Protease from *Bacillus amiloliquefaciens*<sup>1</sup> (WO 2005/085462)

Racemic (**8a**) (100mg, 0.33mmol) was suspended in phosphate buffer pH=7 (4mL) at 37°C obtaining a white suspension, protease from *Bacillus amiloliquefaciens* (8.4mL) was added slowly. The mixture was left to react at 37°C and sampled several times for 5 days, the maximum conversion was 10% circa. The reaction was filtered and the filtered solution (showing pH=6.5) was basified to pH=9.3, then was extracted with DCM, dried over Na<sub>2</sub>SO<sub>4</sub>, and the solvent was evaporated affording (**8a**) (31.4mg). From the filtration a white solid was recovered from the filter, NMR analysis showed to be (**7**) (8.2mg).

Entry 2: Protease from *Bacillus* species<sup>1</sup> (WO 2005/085462)

Racemic (**8a**) (100mg, 0.33mmol) was suspended in phosphate buffer pH=7 (4mL) at 37°C obtaining a white suspension, protease from *Bacillus* species (0.42mL) was added slowly. The mixture was left to react at 40°C and sampled several times for 21 hours, the maximum conversion was 49% circa. The reaction was filtered and the filtered solution (showing pH=7.15) was basified to pH=9.7, then was extracted with DCM, dried over Na<sub>2</sub>SO<sub>4</sub>, and the solvent was evaporated affording (**8a**) (44.1mg). From the filtration a white solid was recovered from the filter, NMR analysis showed to be (**7**) (38.2mg).

Entry 3: Protease type XIII *Aspergillus Saitoi*<sup>1</sup> (WO 2005/085462)

Racemic (**8a**) (100mg, 0.33mmol) was suspended in phosphate buffer pH=7 (5mL) at 37°C obtaining a white suspension, protease from *Bacillus* species (100mg) was added slowly. The mixture was left to react at 37°C and sampled several times for 48 hours, the maximum conversion was <5%. The reaction was filtered and the filtered solution (showing pH=7.2) was basified to pH=9.3, then was extracted with AcOEt, dried over Na<sub>2</sub>SO<sub>4</sub>, and the solvent was evaporated affording (**8a**) (38.3mg). From the filtration a white solid was recovered from the filter, NMR analysis showed to be (**7**) (2.2mg).

Entry 4: Lipase B *Candida Antarctica*<sup>2</sup>.

Racemic (**8a**) (100mg, 0.33mmol) was suspended in hexane (2.06mL), H<sub>2</sub>O (0.5 eq, 2.97 μL) was added and then Lipase B *Candida antarctica* (33mg) was added. The reaction was left to react at 45°C for 12 hours and sampled several times, because of the lack of solubility of the starting material in the solvent, 20% acetone was added to the mixture, the maximum conversion after 48 hours was <5%. The reaction was filtered and the filtered solution was dried, affording (**8a**) in a rather complicated crude mixture (98.2mg).

Entry 5: Lipase A *Candida Antarctica*<sup>2</sup>.

Racemic (**8a**) (100mg, 0.33mmol) was suspended in CH<sub>3</sub>CN (2.0mL), H<sub>2</sub>O (0.5 eq, 2.97 μL) was added and then Lipase A *Candida antarctica* (33mg) was added. The reaction was left to react at 45°C for 5 days and sampled several times, the maximum conversion was <5%. The reaction was filtered and the filtered solution was dried, affording a complicated crude mixture (103.2mg).

Entry 6: Lipase B *Candida Antarctica*<sup>3</sup>.

Racemic (**8a**) (67mg, 0.17mmol) was solubilized in acetone (1.4mL), H<sub>2</sub>O (10.5mL) was added and then Lipase B *Candida antarctica* (17.0mg) was added. The mixture was stirred for 24 hours at 37°C and sampled various times, the maximum conversion was 46%. The reaction was filtered and the filtered solution (showing pH=7.4) was basified to pH=10.3, then was extracted with AcOEt, dried over Na<sub>2</sub>SO<sub>4</sub>, and the solvent was evaporated affording (**8a**) (42.8mg). From the filtration a white solid was recovered from the filter, NMR analysis showed to be (**7**) (39.4mg).

Entry 7: Lipase A *Candida Antarctica*<sup>3</sup>.

Racemic **(8a)** (67mg, 0.17mmol) was solubilized in CH<sub>3</sub>CN (1.4mL), H<sub>2</sub>O (10.5mL) was added and then Lipase A *Candida antarctica* (17.0mg) was added. The mixture was stirred for 18 hours at 37°C and sampled various times, the maximum conversion was 58%. The reaction was filtered and the filtered solution (showing pH=7.4) was basified to pH=10.3, then was extracted with AcOEt, dried over Na<sub>2</sub>SO<sub>4</sub>, and the solvent was evaporated affording **(8a)** (41.3mg). From the filtration a white solid was recovered from the filter, NMR analysis showed to be **(7)** (36.4mg).

Entry 8: Trypsin tpck treated from bovine pancreas<sup>4</sup> (DE 3919029)

Racemic **(8a)** (152.7mg, 0.5mmol) was suspended in phosphate buffer pH=7 (3.2mL) at r.t. obtaining a white suspension, Trypsin tpck treated from bovine pancreas (33mg) was added. The mixture was left to react at r.t. and sampled several times for 3 days, the maximum conversion was 14%. The reaction was filtered and the filtered solution (showing pH=8.2) was basified to pH=10.1, then was extracted with AcOEt, dried over Na<sub>2</sub>SO<sub>4</sub>, and the solvent was evaporated affording **(8a)** (42.1mg). From the filtration a white solid was recovered from the filter, NMR analysis showed to be **(7)** (31.2mg).

Entry 9: Protease from *Bacillus streptomyces griseus*<sup>5</sup>.

Racemic **(8a)** (100mg, 0.33mmol) was suspended in carbonate buffer (22mL) pH=7 at r.t. obtaining a white suspension, Protease from *Bacillus streptomyces griseus* (15mg) was added. The mixture was left to react at r.t. and sampled several times for 52 hours, the maximum conversion was 40%. The reaction was filtered and the filtered solution (showing pH=8.1) was basified to pH=10.2, then was extracted with AcOEt, dried over Na<sub>2</sub>SO<sub>4</sub>, and the solvent was evaporated affording **(8a)** (39.2mg). From the filtration a white solid was recovered from the filter, NMR analysis showed to be **(7)** (28.1mg).

Entry 10: Alcalase from *Bacillus licheniformis*<sup>6</sup>.

Racemic **(8a)** (100mg, 0.33mmol) was suspended in phosphate buffer (2mL) pH=7 at 37°C obtaining a white suspension, Alcalase from *Bacillus licheniformis* (111 mg of solution that corresponds to 10 mg of pure enzyme) was added. The mixture was left to react at 37°C and sampled several times for 24 hours, the maximum conversion was 47%. The reaction was filtered and the filtered solution (showing pH=7.4) was basified to pH=9.5, then was extracted with AcOEt, dried over Na<sub>2</sub>SO<sub>4</sub>, and the solvent was evaporated affording **(8a)** (36.2mg). From the filtration a white solid was recovered from the filter, NMR analysis showed to be **(7)** (29.5mg).

Entry 11: Protease from *Bacillus licheniformis*<sup>1</sup> (WO 2005/085462)

Racemic **(8a)** (100mg, 0.33mmol) was suspended in phosphate buffer (3.9mL) pH=7 at 37°C obtaining a white suspension, Protease from *Bacillus licheniformis* (1.4 mL) was added. The mixture was left to react at 37°C and sampled several times for 24 hours, the maximum conversion was 49%. The reaction was filtered and the filtered solution (showing pH=7.4) was basified to pH=10.1, then was extracted with AcOEt, dried over Na<sub>2</sub>SO<sub>4</sub>, and the solvent was evaporated affording **(8a)** (37.6mg). From the filtration a white solid was recovered from the filter, NMR analysis showed to be **(7)** (28.7mg).

Entry 12: Protease from *Bacillus amyloliquefaciens*<sup>1,7</sup> (WO 2005/085462).

Racemic **(8a)** (100mg, 0.33mmol) was suspended in phosphate buffer pH=9 (4mL) at 60°C obtaining a white suspension, protease from bovine pancreas type I (8.4mL) was added in portions. The mixture was left to react at 60°C and sampled after 6h, the maximum conversion was 50% circa. The reaction was filtered and the filtered solution (showing pH=7.3) was basified to pH=9.4, then was extracted with AcOEt, dried over Na<sub>2</sub>SO<sub>4</sub>, and the solvent was evaporated affording **(8a)** (36.2mg). From the filtration a white solid was recovered from the filter, NMR analysis showed to be **(7)** (39.8mg).



Entry 13: Protease from bovine pancreas Type I<sup>1</sup> (WO 2005/085462).

Racemic **(8a)** (100mg, 0.33mmol) was suspended in phosphate buffer pH=7 (5mL) at 37°C obtaining a white suspension, protease from bovine pancreas type I (100mg) was added in portions. The mixture was left to react at 37°C and sampled after 6h, the maximum conversion was 50% circa. The reaction was filtered and the filtered solution (showing pH=7.3) was basified to pH=9.4, then was extracted with AcOEt, dried over Na<sub>2</sub>SO<sub>4</sub>, and the solvent was evaporated affording **(8a)** (36.2mg). From the filtration a white solid was recovered from the filter, NMR analysis showed to be **(7)** (39.8mg).

Entry 14: Lipase from Candida Rugosa

Racemic **(8a)** (150mg, 0.5mmol) was suspended in acetone (0.2mL), then phosphate buffer pH=7 (1.1 mL) was added and then Lipase from Candida Rugosa (19mg) was added. The reaction was left to react at room temperature for 72 hours and conversions determined by HPLC was <10%.

Entry 15: reported in optimized synthesis of the intermediates.

## Optimized synthesis of the intermediates:

### Methyl 3-amino-2-((3,8-dimethoxynaphthalen-2-yl)methyl)propanoate (**8a**).

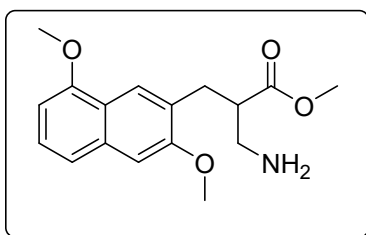

3-amino-2-((3,8-dimethoxynaphthalen-2-yl)methyl)propanoic acid (10.0 g, 34.6 mmol) was suspended in MeOH (158.9 mL), a solution of H<sub>2</sub>SO<sub>4</sub> (6.06 mL, 3.3 eq.) in MeOH (37.2 mL) was dropwise added. The obtained solution was refluxed for 3.5h, then MeOH was partially evaporated, water (80 mL) was added, and the mixture was basified to pH>7 using Na<sub>2</sub>CO<sub>3</sub>. The ester was extracted using AcOEt (3 x 30 mL), the organic phase was washed with brine (2 x 20 mL), dried with Na<sub>2</sub>SO<sub>4</sub> and the organic solvent was

evaporated affording the title compound as a yellow oil (9.8 g, 32.1 mmol, yield 93%). <sup>1</sup>H NMR (400 MHz, CDCl<sub>3</sub>) δ 7.97 (s, 1H), 7.33–7.27 (m, 2H), 7.05 (s, 1H), 6.67 (dd, *J* = 6.1, 2.5 Hz, 1H), 3.96 (s, 3H), 3.92 (s, 3H), 3.66 (s, 3H), 3.10 (dd, *J* = 13.2, 5.9 Hz, 1H), 3.00 (dd, *J* = 13.2, 6.5 Hz, 1H), 2.96–2.83 (m, 3H). <sup>13</sup>C NMR (101 MHz, CDCl<sub>3</sub>) δ 175.6, 156.8, 155.4, 135.1, 128.0, 126.2, 123.8, 120.4, 119.0, 105.0, 102.2, 55.5, 55.4, 51.6, 49.2, 43.5, 31.1. *m/z* HRMS ESI-MS calcd for C<sub>17</sub>H<sub>21</sub>NO<sub>4</sub>: 303.1471; found [M+H]<sup>+</sup>: 304.1549

### (*R*)-3-amino-2-((3,8-dimethoxynaphthalen-2-yl)methyl)propanoic acid (*R*)-**7**.

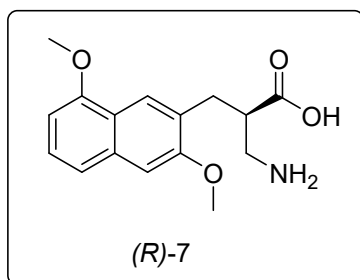

Racemic compound (**8a**) (5.0 g, 16.38 mmol) was suspended in phosphate buffer pH=7 (195 mL) at 37°C and stirred for 10 minutes. Protease from *Bacillus licheniformis* (>2.4 U/g, 140 mL) was portion-wise added, and the mixture was left to react for 48h under vigorous stirring. The obtained suspension was filtered under vacuum affording a filtered dark yellow solution and a solid cake. The filtered solution was basified using Na<sub>2</sub>CO<sub>3</sub> to pH=9 and extracted with AcOEt (3 x 25 mL). The organic phase was washed with brine (2 x 20 mL) and dried with Na<sub>2</sub>SO<sub>4</sub>. The organic solvent was

evaporated affording (**S**)-**8** (2.2 g, 7.2 mmol, yield 44%, ee > 99%, Daicel AD-H column, eluent heptane/IPA 88:12). The solid cake was suspended in a mixture of EtOH/H<sub>2</sub>O (1:1) (300 mL), LiOH·H<sub>2</sub>O was added to pH=11 and the mixture was stirred overnight at 60°C. The suspension was filtered under vacuum, obtaining a brown slime and a filtered solution. The filtered solution was heated to 60°C and a solution of AcOH (1:1) in EtOH/H<sub>2</sub>O (1:1) was dropwise added to pH=9-9.5. The mixture was stirred for 30 minutes, then AcOH in EtOH/H<sub>2</sub>O was added to pH=8-8.5, and the mixture was cooled to room temperature. The pH was adjusted to pH=8-8.5, then the suspension was filtered under vacuum affording (*R*)-**7** as a white solid [1.97g, 6.80 mmol, total yield 39%, single enantiomer (73% yield), ee= 97.4%, [α]<sub>D</sub><sup>20</sup> = -38.4, 1.2 mg in 1 mL MeOH]. <sup>1</sup>H NMR (400 MHz, MeOD) δ 8.03 (s, 1H), 7.33–7.25 (m, 2H), 7.18 (s, 1H), 6.73 (dd, *J* = 6.1, 2.5 Hz, 1H), 3.97 (s, 6H), 3.10 (dd, *J* = 13.2, 5.9 Hz, 1H), 3.02-2.94 (m, 1H), 2.93–2.81 (m, 3H). <sup>13</sup>C NMR (101 MHz, MeOD) δ 169.2, 156.6, 155.2, 135.4, 135.2, 127.8, 125.9, 123.5, 120.3, 118.6, 104.8, 101.8, 54.4, 44.9, 40.6, 31.4. *m/z* HRMS ESI-MS calcd for C<sub>16</sub>H<sub>19</sub>NO<sub>4</sub>: 289.1314; found [M+HCOO]<sup>-</sup>: 334.1296.

### (*S*)-3-amino-2-((3,8-dimethoxynaphthalen-2-yl)methyl)propanoic acid [(*S*)-**7**].

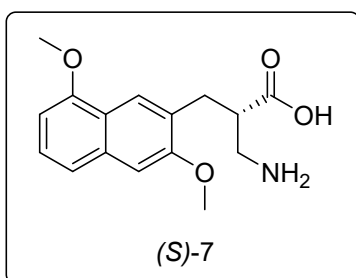

Methyl (*S*)-3-amino-2-((3,8-dimethoxynaphthalen-2-yl)methyl)propanoate [(*S*)-**8a**] (1.53 g, 5.0 mmol) was dissolved in a mixture of EtOH/H<sub>2</sub>O (1:1) (28.0 mL) and LiOH·H<sub>2</sub>O was added (4.3 eq, 902.15 mg), the reaction mixture was refluxed for 3h. The mixture was cooled to 60°C, and AcOH (1:1) in EtOH/H<sub>2</sub>O (1:1) was dropwise added to pH=9-9.5. The mixture was stirred for 30 minutes, then AcOH in EtOH/H<sub>2</sub>O was added to pH=8-8.5, and the mixture was cooled to room temperature. The pH was adjusted to pH=8-8.5, then the suspension was filtered under vacuum affording title

compound as a white solid (1.17 g, 4.0 mmol, yield 80%).  $^1\text{H}$  NMR (400 MHz, MeOD)  $\delta$  8.03 (s, 1H), 7.33–7.25 (m, 2H), 7.18 (s, 1H), 6.73 (dd,  $J$  = 6.1, 2.5 Hz, 1H), 3.97 (s, 6H), 3.10 (dd,  $J$  = 13.2, 5.9 Hz, 1H), 3.02–2.94 (m, 1H), 2.93–2.81 (m, 3H).  $^{13}\text{C}$  NMR (101 MHz, MeOD)  $\delta$  169.2, 156.6, 155.2, 135.4, 135.2, 127.8, 125.9, 123.5, 120.3, 118.6, 104.8, 101.8, 54.4, 44.9, 40.6, 31.4.  $m/z$  HRMS ESI-MS calcd for  $\text{C}_{16}\text{H}_{19}\text{NO}_4$ : 289.1314; found  $[\text{M}+\text{HCOO}]$ : 334.1293.

**(3*R*, 4*aS*,*R*)-3-carboxy-6-methoxy-2,3,4,4*a*,5,10-hexahydrobenzo[*g*]quinolin-1-ium chloride (3*R*, 4*aS*,*R*)-(2).**

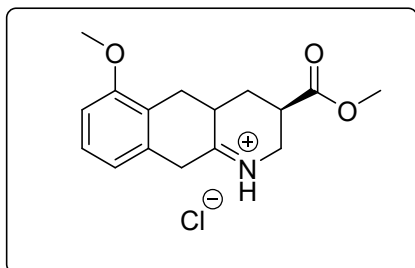

(*R*)-3-amino-2-((3,8-dimethoxynaphthalen-2-yl)methyl)propanoic acid [(*R*)-7] (1.83 g, 6.34 mmol) was suspended in dry THF (18.33 mL, 10 Vol.) in argon atmosphere using mechanical stirring; dry *t*-BuOH (2.4 eq, 13.2 mmol, 1.45 mL) was added and the mixture was cooled to -70°C.  $\text{NH}_3$  (9.17 mL, 5 Vol.) was condensed in a trap at -50°C then added to the reaction mixture. Lithium wires (5.2 eq, 32.97 mmol, 227.48 mg) in oil were dried and portion-wise added, after the addition, the

mixture turned from white to dark green and after 2-3 minutes it turned dark blue. The reaction mixture is left to react at -70°C for 2.5h (if during this time there is a loss of color, extra lithium has to be added).  $\text{NH}_3$  was evaporated overnight at room temperature, then the reaction was quenched with water (13.0 mL). The organic solvents were evaporated at 50°C and 100mbar, and the aqueous phase was dropwise added to a solution of concentrated HCl (4.6 mL) at 0°C. The obtained suspension was left to stir for 4.0h, then it was filtered under vacuum, and washed with HCl 2N (2 mL) and water (2 mL x 2) affording title compound as a beige solid after drying for 48h at 50°C under vacuum (780 mg, 2.64 mmol, yield 42%).  $^1\text{H}$  NMR (400 MHz, MeOD)  $\delta$  7.23 (t,  $J$  = 8.0 Hz, 1H), 6.87 (dd,  $J$  = 8.2, 4.0 Hz, 1H), 6.83–6.77 (m, 1H), 4.02–3.93 (m, 2H), 3.94–3.75 (m, 4H), 3.50 (t,  $J$  = 16.5 Hz, 1H), 3.20–3.09 (m, 1H), 2.66 (d,  $J$  = 16.4 Hz, 1H), 2.59–2.47 (m, 1H), 2.38 (dd,  $J$  = 14.0, 7.7 Hz, 1H), 2.07 (dd,  $J$  = 14.0, 4.4 Hz, 1H), 1.79 (dd,  $J$  = 13.6, 11.9 Hz, 1H).  $^{13}\text{C}$  NMR (101 MHz, MeOD)  $\delta$  193.8, 174.6, 158.0, 132.3, 129.4, 123.8, 121.1, 110.0, 56.1, 46.8, 46.8, 37.4, 35.9, 29.9, 28.2, 26.7.  $m/z$  HRMS ESI-MS calcd for  $\text{C}_{16}\text{H}_{20}\text{ClNO}_3$ : 309.1132; found  $[\text{M}+\text{H}]$ : 310.1210

**Methyl (3*R*,4*aR*,10*aR*)-6-methoxy-1,2,3,4,4*a*,5,10,10*a*-octahydrobenzo[*g*]quinoline-3-carboxylate [(3*R*,4*aR*,10*aR*)-3*a*].**

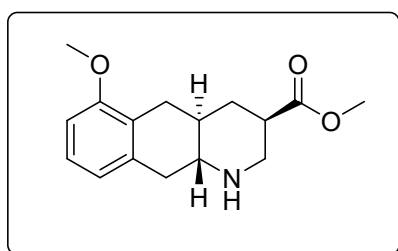

Iminium chloride (3*R*, 4*aS*,*R*)-(2) (700 mg, 2.36 mmol) was solubilized in dry MeOH (14 mL) in argon atmosphere and cooled to -70°C, and  $\text{LiBH}_4$  (77.8 mg, 3.57 mmol) was portion-wise added. After 2.0h the mixture was heated to -20°C and a solution of  $\text{H}_2\text{SO}_4$  in MeOH (2.64 M, 2.4 mL) was dropwise added. The reaction mixture was refluxed for 3.5h. Once cooled to room temperature, MeOH was partially evaporated and water (14 mL) was added.  $\text{Na}_2\text{CO}_3$  was added to pH>7, and the biphasic mixture

was extracted with AcOEt (15 mL x 3). The organic phase was dried with  $\text{Na}_2\text{SO}_4$  and the solvents were evaporated to afford the title compound as dark yellow oil (403 mg, 1.47 mmol, yield 62%,  $dr = 5.7$ ).  $^1\text{H}$  NMR (400 MHz,  $\text{CDCl}_3$ )  $\delta$  7.10 (t,  $J$  = 7.8 Hz, 1H), 6.69 (dd,  $J$  = 17.2, 7.9 Hz, 2H), 3.81 (s, 3H), 3.69 (s, 3H), 3.40–3.34 (m, 1H), 3.01–2.78 (m, 3H), 2.67–2.54 (m, 2H), 2.29–2.23 (m, 1H), 2.22–2.12 (m, 1H), 1.45–1.36 (m, 1H).  $^{13}\text{C}$  NMR (101 MHz,  $\text{CDCl}_3$ )  $\delta$  174.1, 155.4, 143.0, 135.1, 125.8, 122.3, 121.7, 119.2, 118.1, 107.0, 100.4, 55.4, 52.1, 43.8, 38.6, 30.5.  $m/z$  HRMS ESI-MS calcd for  $\text{C}_{16}\text{H}_{21}\text{NO}_3$ : 275.1521; found  $[\text{M}+\text{H}]$ : 276.1599

**(3*R*,4*aR*,10*aR*)-6-methoxy-3-(methoxycarbonyl)-1,2,3,4,4*a*,5,10,10*a*-octahydrobenzo[*g*]quinolin-1-ium 4-methylbenzenesulfonate [(3*R*,4*aR*,10*aR*)-4].**

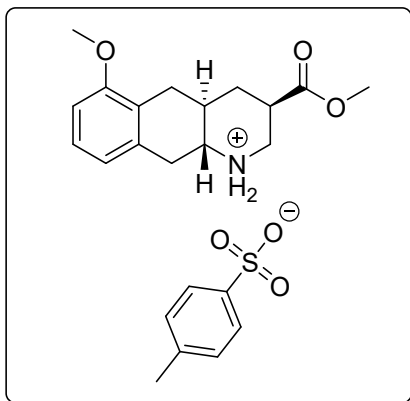

**(3R,4aR,10aR)-(3a)** (550 mg, 2.0 mmol) was solubilized in AcOEt (3.0 mL) at 70°C, and a solution of p-toluene sulphonic acid (378 mg, 2.19 mmol) in AcOEt (3.30 mL) was dropwise added. The obtained suspension was cooled to 0°C for 3.0h and filtered under vacuum. The afforded purple solid was washed using cold AcOEt (3 mL) affording a light pink powder that was dried under vacuum (695 mg, 1.55 mmol, yield 78%, dr >10). <sup>1</sup>H NMR (400 MHz, MeOD) δ 7.70 – 7.65 (m, 2H), 7.22 – 7.17 (m, 2H), 7.12 (t, J = 8.0 Hz, 1H), 6.77 (d, J = 8.2 Hz, 1H), 6.69 (d, J = 7.7 Hz, 1H), 3.80 (s, 3H), 3.74 (s, 3H), 3.65 (ddd, J = 12.7, 4.0, 1.9 Hz, 1H), 3.22 – 3.06 (m, 4H), 2.97 (tt, J = 12.5, 3.8 Hz, 1H), 2.84 (dd, J = 15.3, 11.1 Hz, 1H), 2.34 (s, 3H), 2.30 – 2.19 (m, 1H), 1.90 (ddd, J = 11.5,

5.5, 3.8 Hz, 1H), 1.51 (q, J = 12.7 Hz, 1H). <sup>13</sup>C NMR (101 MHz, MeOD) δ 171.5, 156.9, 140.4, 132.7, 128.5, 126.9, 125.5, 122.6, 120.4, 107.6, 55.9, 54.4, 51.4, 48.2, 48.0, 47.8, 47.6, 47.4, 47.2, 47.0, 44.4, 38.6, 34.1, 32.5, 32.1, 29.0, 19.9. (Banziger, M.; Cercus, J.; Stampfer, W.; Sunay U.; *Organic Process Research & Development* **2000**, *4*, 460-466)

**Methyl (3R,4aR,10aR)-6-methoxy-1-propyl-1,2,3,4,4a,5,10,10a-octahydrobenzo[g]quinoline-3-carboxylate [(3R,4aR,10aR)-10].**

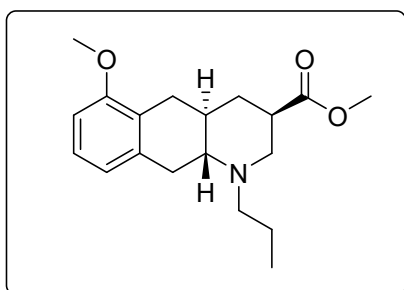

**(3R,4aR,10aR)-(9)** (675 mg, 1.5 mmol) was suspended in DMF (6.5 mL), K<sub>2</sub>CO<sub>3</sub> (384 mg, 3.0 mmol) was added in argon atmosphere. 1-Iodopropane (364 mL, 637.5 mg, 3.75 mmol) was dropwise added at 50°C, and the reaction mixture was left to stir for 4.0h. Toluene (14.5 mL) was added, then water (12.9 mL) was added to the mixture at 0°C. The biphasic mixture was extracted with toluene (15 mL x 3), dried with Na<sub>2</sub>SO<sub>4</sub>, and the organic solvents were evaporated affording title compound as a brown sticky oil (457 mg, 1.44 mmol, yield 96%, dr >10).

<sup>1</sup>H NMR (400 MHz, CHCl<sub>3</sub>) δ 7.11 (t, J = 7.9 Hz, 1H), 6.73 (d, J = 7.7 Hz, 1H), 6.66 (d, J = 8.1 Hz, 1H), 3.81 (s, 3H), 3.70 (s, 3H), 3.27 (bd, J = 11.5 Hz, 1H), 3.17 (dd, J = 16.1, 5.0 Hz, 1H), 2.98 (dd, J = 17.6, 5.1 Hz, 1H), 2.87–2.56 (m, 4H), 2.44 (t, J = 11.7 Hz, 1H), 2.30–2.14 (m, 3H), 1.61–1.51 (m, 2H), 1.37–1.22 (m, 2H), 0.92 (t, J = 7.3 Hz, 3H). <sup>13</sup>C NMR (101 MHz, CDCl<sub>3</sub>) δ 174.5, 156.8, 136.3, 126.5, 124.2, 121.4, 107.1, 60.5, 55.3, 55.2, 54.2, 51.8, 41.6, 36.8, 34.7, 30.6, 30.4, 17.6, 12.1. m/z HRMS ESI-MS calcd for C<sub>19</sub>H<sub>27</sub>NO<sub>3</sub>: 317.1991; found [M+H]: 318.2069

**Methyl (3S,4aR,10aR)-6-methoxy-1-propyl-1,2,3,4,4a,5,10,10a-octahydrobenzo[g]quinoline-3-carboxylate [(3S,4aR,10aR)-11].**

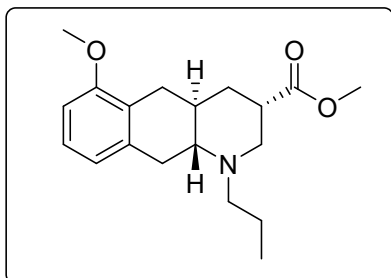

In a Schlenk at -50°C, LDA (0.85 mL, 1.7 mmol, 2M in THF) was added in argon atmosphere, a solution of **(3R,4aR,10aR)-10** (250 mg, 0.79 mmol) in THF (1.95 mL, 0.4M) was dropwise added, and the mixture was left to react for 40 minutes. Freshly distilled TMSCl (0.2 mL, 170 mg, 1.56 mmol) was dropwise added and the mixture was left to react for 1.0 h. The mixture was then slowly dropwise added to a solution of HCl 15% (2.44 mL) at -30°C and left to stir for 15 minutes. A saturated solution of Na<sub>2</sub>CO<sub>3</sub> was added at -10°C and then the mixture was left to stir at room

temperature for 1.0h. The biphasic mixture was extracted with toluene (10 mL x 3), the organic phase was dried with Na<sub>2</sub>SO<sub>4</sub>, and the solvents were evaporated affording crude **[(3S,4aR,10aR)-11]** as a brown sticky oil (210 mg). The solid was purified by flash chromatography (Hex/AcOEt: 8/2) affording a light yellow solid (105 mg, 0.32 mmol, yield 41%). A simple crystallization from MeOH afforded the title compound as single stereoisomer. [α]<sub>D</sub> = -137 (c = 0.5, CHCl<sub>3</sub>). The comparison of the sign of the optical rotatory power reported

in the literature (S. P. Chavan, A. L. Kadam, R. G. Gonnade, *Org. Lett.* 2019, 21, 9089-9094) established the absolute configuration of the final product. <sup>1</sup>H NMR (400 MHz, CDCl<sub>3</sub>) δ 7.08 (t, *J* = 7.9 Hz, 1H), 6.71 (d, *J* = 7.7 Hz, 1H), 6.64 (d, *J* = 8.1 Hz, 1H), 3.81 (s, 3H), 3.69 (s, 3H), 3.45 (dt, *J* = 11.4, 2.4 Hz, 1H), 3.11 (dd, *J* = 16.1, 5.0 Hz, 1H), 2.96 (dd, *J* = 17.3, 5.0 Hz, 1H), 2.78–2.57 (m, 3H), 2.41–2.29 (m, 3H), 2.20–2.06 (m, 2H), 1.92–1.80 (m, 1H), 1.48 (q, *J* = 7.4 Hz, 2H), 1.32–1.27 (m, 1H), 0.88 (t, *J* = 7.4 Hz, 3H). <sup>13</sup>C NMR (101 MHz, CDCl<sub>3</sub>) δ 174.2, 156.5, 136.6, 125.9, 125.4, 121.1, 106.6, 61.3, 55.0, 54.3, 53.4, 51.4, 39.8, 34.6, 34.0, 32.2, 30.5, 18.0, 11.7. *m/z* HRMS ESI-MS calcd for C<sub>19</sub>H<sub>27</sub>NO<sub>3</sub>: 317.1991; found [M+H]: 318.2068.

### Bibliography:

1. Kaptein B.; Broxterman Q. B.; Kierkels J. G. T.; Milcent T. Patent application, WO 2005/085462 A
2. Rangel, H.; Carrillo-Morales, M.; Galindo, J. M.; Castillo, E.; Obregón-Zúñiga, A.; Juaristi, E.; Escalante, J. *Tetrahedron Asymmetry* **2015**, 26, 325–332.
3. Zieniuk, B.; Fabiszewska, A.; Białecka-Florjańczyk, E. *Bioprocess Biosyst. Eng.* **2020**, 43, 605–613.
4. Degueil-Castaing, M.; De Jeso, B.; Drouillard, S.; Maillard, B. *Tetrahedron Lett.* 1987, 9, 953-954..
5. Sih, C. J. G. F. *Am. Chem. Soc.* **1987**, 109, 2845–2848.
6. Tofani, G.; Petri, A.; Piccolo, O. *Tetrahedron Asymmetry* **2015**, 26, 638–643.
7. Guleria, S.; Walia, A.; Chauhan, A.; Shirkot, C. K. *J. Basic Microbiol.* **2016**, 56, 138–152.

## CSP-HPLC traces:

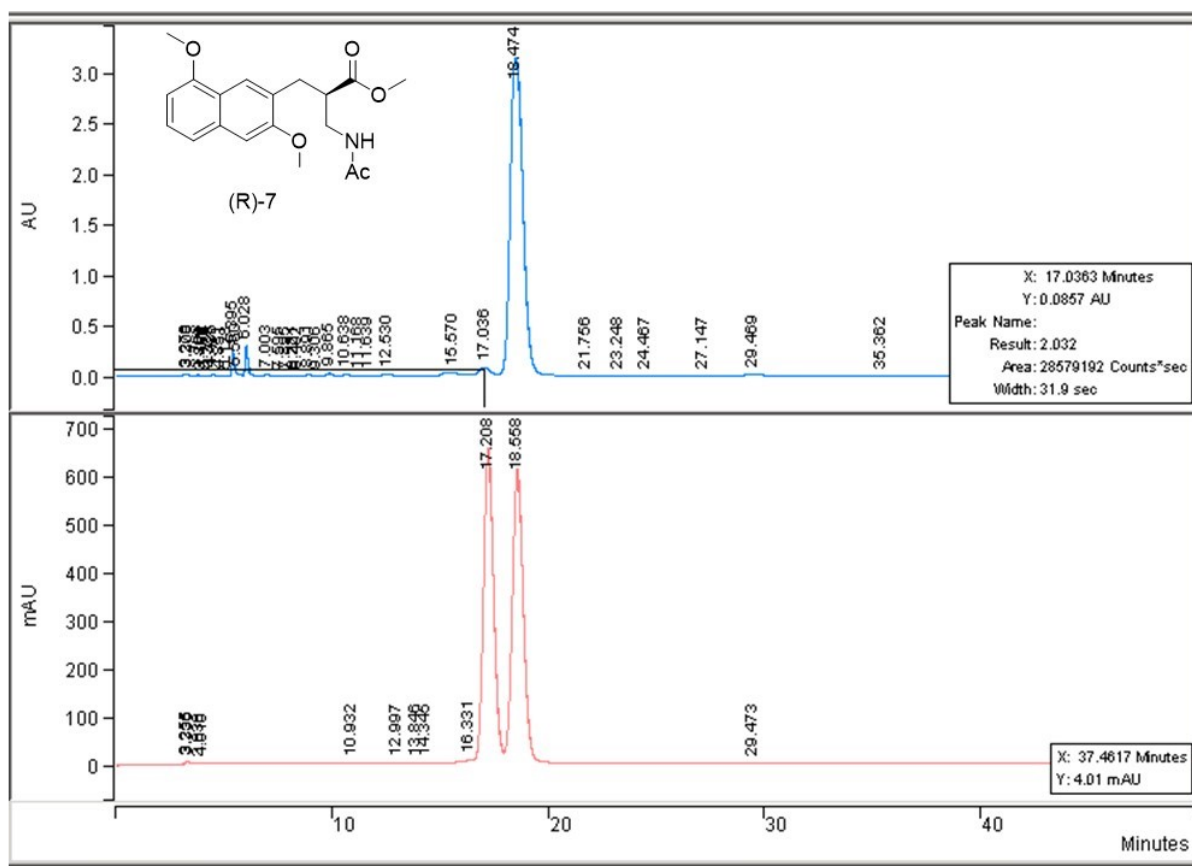

Calculation Type: Percent

| Peak No. | Peak Name | Result ( ) | Ret. Time (min) | Time Offset (min) | Area (counts) | Sp. Code | Width (sec) | Status Codes |
|----------|-----------|------------|-----------------|-------------------|---------------|----------|-------------|--------------|
| 1        |           | 0.1113     | 3.276           | 0.000             | 1564545       | EV       | 19.2        |              |
| 2        |           | 0.0740     | 3.308           | 0.000             | 1041277       | WV       | 12.8        |              |
| 3        |           | 0.0452     | 3.768           | 0.000             | 636030        | WV       | 10.5        |              |
| 4        |           | 0.0212     | 3.838           | 0.000             | 297471        | WV       | 0.0         |              |
| 5        |           | 0.0266     | 4.106           | 0.000             | 374441        | WV       | 8.4         |              |
| 6        |           | 0.0067     | 4.335           | 0.000             | 32770         | WV       | 0.0         |              |
| 7        |           | 0.0692     | 4.485           | 0.000             | 973759        | WV       | 8.0         |              |
| 8        |           | 0.0088     | 4.851           | 0.000             | 123556        | WV       | 0.0         |              |
| 9        |           | 0.0168     | 5.128           | 0.000             | 236255        | WV       | 17.2        |              |
| 10       |           | 1.2639     | 5.395           | 0.000             | 17773210      | WV       | 6.4         |              |
| 11       |           | 0.1685     | 5.560           | 0.000             | 2369319       | WV       | 9.9         |              |
| 12       |           | 1.8992     | 6.028           | 0.000             | 26706590      | WP       | 7.1         |              |
| 13       |           | 0.1188     | 7.003           | 0.000             | 1671200       | TF       | 0.0         |              |
| 14       |           | 0.0255     | 7.595           | 0.000             | 358938        | TF       | 0.0         |              |
| 15       |           | 0.0069     | 7.895           | 0.000             | 97115         | TF       | 0.0         |              |
| 16       |           | 0.0130     | 8.221           | 0.000             | 182432        | TF       | 0.0         |              |
| 17       |           | 0.0079     | 8.402           | 0.000             | 1111044       | TF       | 0.0         |              |
| 18       |           | 0.0642     | 8.891           | 0.000             | 902570        | TF       | 0.0         |              |
| 19       |           | 0.0217     | 9.306           | 0.000             | 304857        | TF       | 0.0         |              |
| 20       |           | 0.2346     | 9.865           | 0.000             | 3299401       | TF       | 0.0         |              |
| 21       |           | 0.1091     | 10.638          | 0.000             | 1524566       | TF       | 0.0         |              |
| 22       |           | 0.0060     | 11.168          | 0.000             | 84808         | TF       | 0.0         |              |
| 23       |           | 0.0101     | 11.639          | 0.000             | 142183        | TF       | 0.0         |              |
| 24       |           | 0.2369     | 12.530          | 0.000             | 3230881       | TF       | 0.0         |              |
| 25       |           | 1.1167     | 15.570          | 0.000             | 15703240      | EV       | 52.3        |              |
| 26       |           | 2.0324     | 17.036          | 0.000             | 28579192      | WV       | 31.9        |              |
| 27       |           | 91.2999    | 18.474          | 0.000             | 1283852544    | VE       | 38.0        |              |
| 28       |           | 0.0426     | 21.756          | 0.000             | 599205        | BE       | 29.2        |              |
| 29       |           | 0.0137     | 23.248          | 0.000             | 192252        | EV       | 25.9        |              |
| 30       |           | 0.1499     | 24.467          | 0.000             | 2107657       | VP       | 51.8        |              |
| 31       |           | 0.1604     | 27.147          | 0.000             | 2255091       | FV       | 42.4        |              |
| 32       |           | 0.5965     | 29.469          | 0.000             | 8288104       | VE       | 50.7        |              |
| 33       |           | 0.0217     | 35.362          | 0.000             | 305512        | BE       | 42.6        |              |
| Totals:  |           |            | 99.9999         | 0.000             | 1406193116    |          |             |              |

**(R)-3-amino-2-((3,8-dimethoxynaphthalen-2-yl)methyl)propanoic acid (R)-7**

**Figure S-1.** Values determined by HPLC on Daicel Chiralcel AD-H on the corresponding methyl ester and acetamides. Comparison of (*R*)-**7** with the racemic mixture.

Methyl (3*R*,4*aR*,10*aR*)-6-methoxy-1,2,3,4,4*a*,5,10,10*a*-octahydrobenzo[*g*]quinoline-3-carboxylate

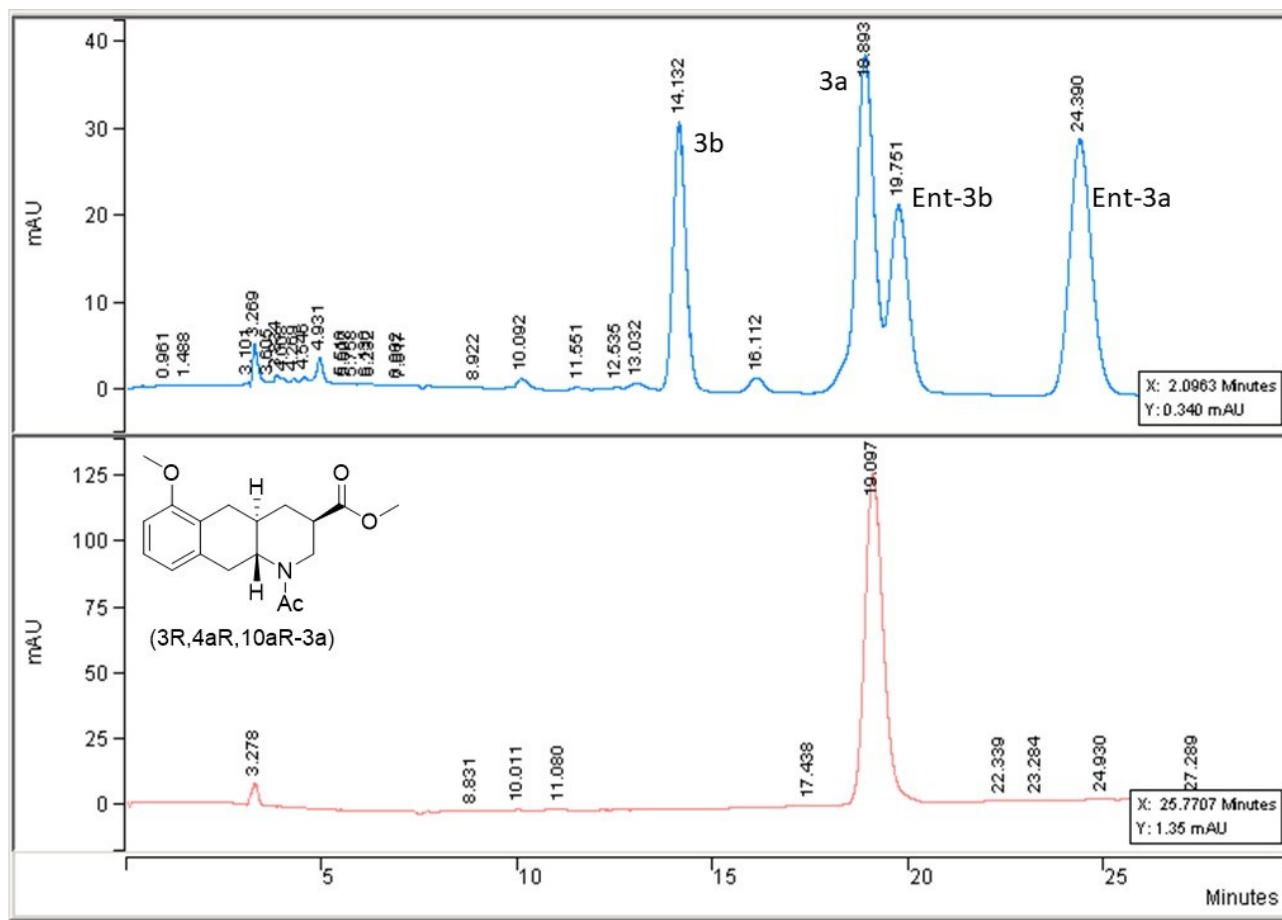

Instrument : Sample Rate : 5.00 Hz  
Channel : 2 = 220 nm Run Time : 29.713 min

\*\* LC Workstation Multi Instrument Version 6.20 \*\* 00469-2188-E28-20F5 \*\*

Run Mode : Analysis  
Peak Measurement: Peak Area  
Calculation Type: Percent

| Peak No. | Peak Name | Result ( ) | Ret. Time (min) | Time Offset (min) | Area (counts) | Sep. Code | Width 1/2 (sec) | Status Codes |
|----------|-----------|------------|-----------------|-------------------|---------------|-----------|-----------------|--------------|
| 1        |           | 2.2665     | 3.278           | 0.000             | 1016438       | PE        | 9.7             |              |
| 2        |           | 0.1320     | 8.831           | 0.000             | 59641         | EE        | 13.7            |              |
| 3        |           | 0.1674     | 10.011          | 0.000             | 75076         | EV        | 15.3            |              |
| 4        |           | 0.3385     | 11.080          | 0.000             | 151811        | VE        | 48.2            |              |
| 5        |           | 0.2013     | 17.438          | 0.000             | 90268         | PV        | 0.0             |              |
| 6        |           | 95.2776    | 19.097          | 0.000             | 42773080      | VE        | 30.1            |              |
| 7        |           | 0.7021     | 22.339          | 0.000             | 314858        | TF        | 0.0             |              |
| 8        |           | 0.1327     | 23.284          | 0.000             | 59489         | TF        | 0.0             |              |
| 9        |           | 0.4982     | 24.930          | 0.000             | 223413        | TF        | 0.0             |              |
| 10       |           | 0.1828     | 27.289          | 0.000             | 81971         | EE        | 12.3            |              |
| Totals:  |           | 100.0001   |                 | 0.000             | 44846045      |           |                 |              |

**[(3*R*,4*aR*,10*aR*-3a)].**

**Figure S-2.** Values determined by HPLC on Daicel Chiralcel AD-H on [(3*R*,4*aR*,10*aR*)-3*a*] acetamide, acetylation was performed on the tosyl salt [(3*R*,4*aR*,10*aR*)-4]] of the product of entry 16 of Table S-1. Comparison of [(3*R*,4*aR*,10*aR*)-3*a*] with the racemic mixture.

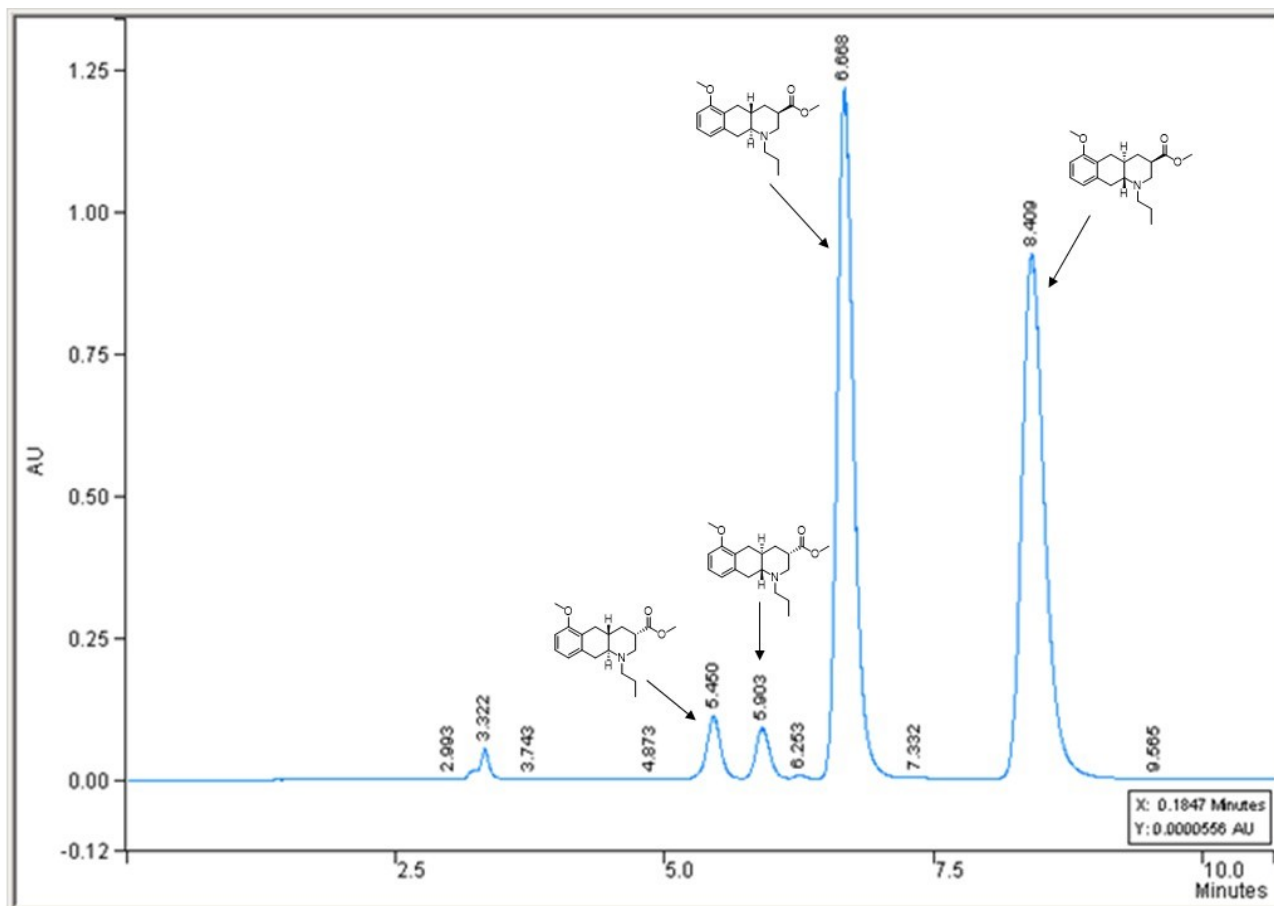

**Figure S-3.** Racemic mixture of compound 10 and 11.



Methyl (3*R*,4*aR*,10*aR*)-6-methoxy-1-propyl-1,2,3,4,4*a*,5,10,10*a*-octahydrobenzo[*g*]quinoline-3-carboxylate

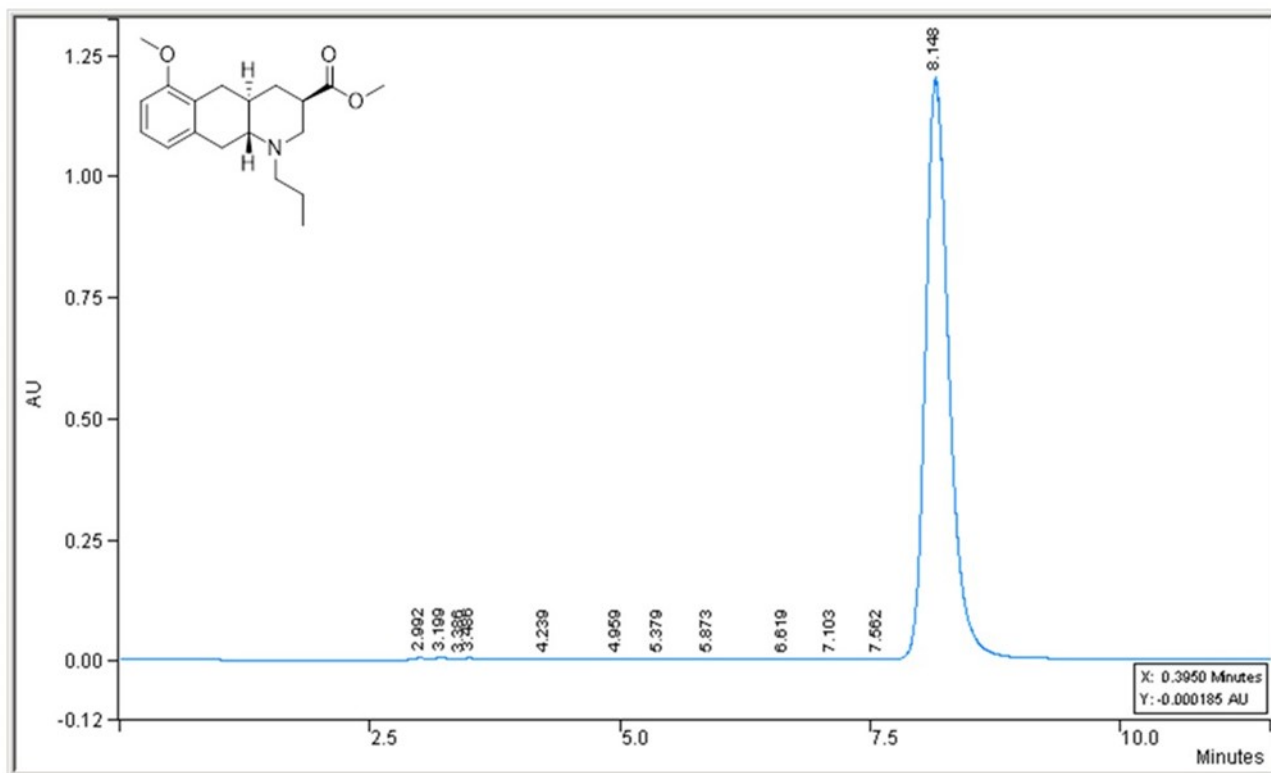

Run Mode : Analysis  
 Peak Measurement: Peak Area  
 Calculation Type: Percent

| Peak No. | Peak Name | Result (%) | Ret. Time (min) | Time Offset (min) | Area (counts) | Sep. Code | Width 1/2 (sec) | Status Codes |
|----------|-----------|------------|-----------------|-------------------|---------------|-----------|-----------------|--------------|
| 1        |           | 0.1768     | 2.992           | 0.000             | 352661        | PV        | 6.9             |              |
| 2        |           | 0.2724     | 3.199           | 0.000             | 543344        | WV        | 0.0             |              |
| 3        |           | 0.0338     | 3.386           | 0.000             | 67514         | WV        | 0.0             |              |
| 4        |           | 0.3240     | 3.486           | 0.000             | 646262        | WV        | 22.5            |              |
| 5        |           | 0.0638     | 4.239           | 0.000             | 127217        | WV        | 0.0             |              |
| 6        |           | 0.0338     | 4.959           | 0.000             | 67507         | WV        | 0.0             |              |
| 7        |           | 0.1239     | 5.379           | 0.000             | 247124        | WV        | 25.0            |              |
| 8        |           | 0.0517     | 5.873           | 0.000             | 103189        | WV        | 0.0             |              |
| 9        |           | 0.1779     | 6.619           | 0.000             | 354924        | WV        | 39.6            |              |
| 10       |           | 0.0358     | 7.103           | 0.000             | 71406         | WV        | 0.0             |              |
| 11       |           | 0.0346     | 7.562           | 0.000             | 69115         | WV        | 0.0             |              |
| 12       |           | 98.6715    | 8.148           | 0.000             | 196843424     | VB        | 14.5            |              |
| Totals:  |           | 100.0000   |                 | 0.000             | 199493687     |           |                 |              |

**[(3*R*,4*aR*,10*aR*)-10].**

Figure S-4. Values determined by HPLC on Daicel Chiralcel AD-H on [(3*R*,4*aR*,10*aR*)-10].

Methyl (3*S*,4*aR*,10*aR*)-6-methoxy-1-propyl-1,2,3,4,4*a*,5,10,10*a*-octahydrobenzo[*g*]quinoline-3-carboxylate  
**[(3*S*,4*aR*,10*aR*)-11]**.

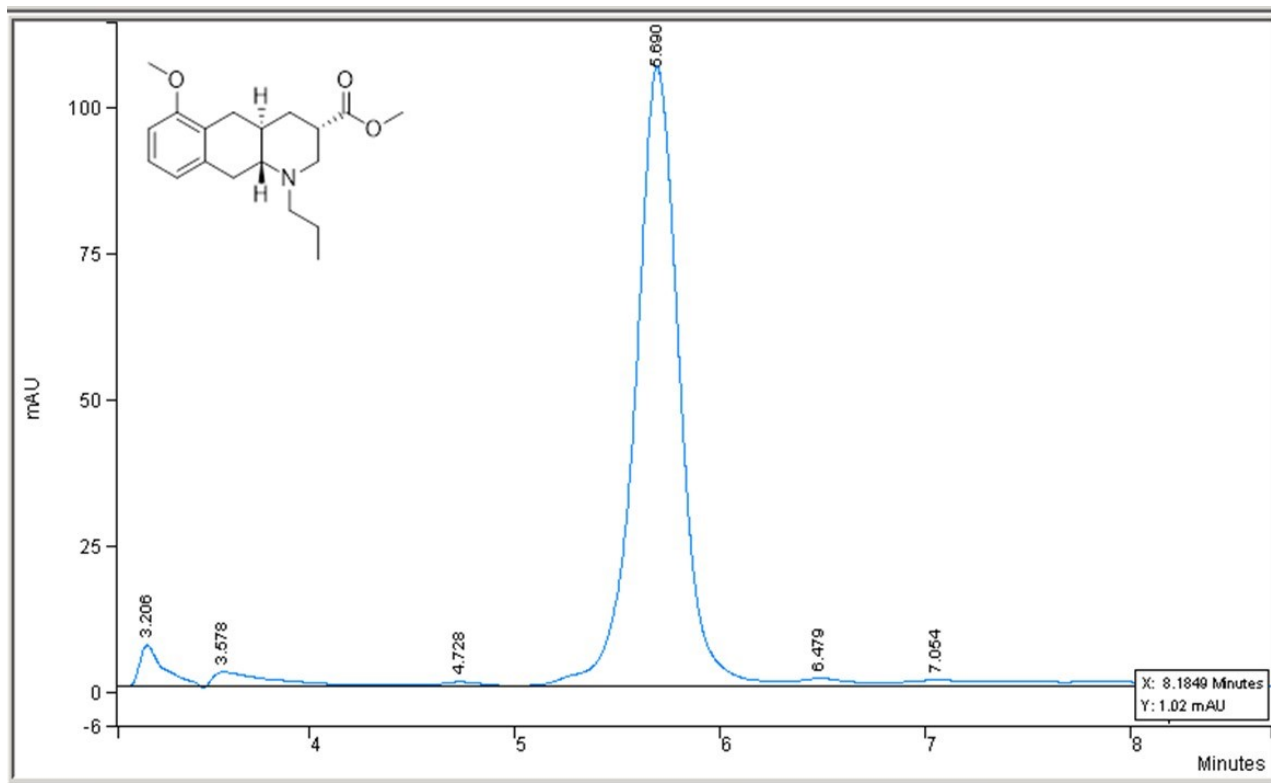

Run Mode : Analysis  
 Peak Measurement: Peak Area  
 Calculation Type: Percent

| Peak No. | Peak Name | Result (%) | Ret. Time (min) | Time Offset (min) | Area (counts) | Width Sep. Code (sec) | 1/2  | Status Codes |
|----------|-----------|------------|-----------------|-------------------|---------------|-----------------------|------|--------------|
| 1        |           | 3.5268     | 3.206           | 0.000             | 629902        | VP                    | 6.4  |              |
| 2        |           | 2.7402     | 3.578           | 0.000             | 489408        | PE                    | 19.2 |              |
| 3        |           | 0.4144     | 4.728           | 0.000             | 74013         | BP                    | 10.6 |              |
| 4        |           | 92.2550    | 5.690           | 0.000             | 16477101      | PE                    | 12.8 |              |
| 5        |           | 0.3579     | 6.479           | 0.000             | 63919         | TS                    | 0.0  |              |
| 6        |           | 0.7058     | 7.054           | 0.000             | 126052        | TF                    | 0.0  |              |
| Totals:  |           | 100.0001   |                 | 0.000             | 17860395      |                       |      |              |

**Figure S-4.** Values determined by HPLC on Daicel Ciracel AD-H on [(3*S*,4*aR*,10*aR*)-11] after chromatographic purification (Hex/AcOEt:7/3) and crystallization in MeOH.

Copies of  $^1\text{H}$  NMR and  $^{13}\text{C}$  NMR spectra:

Methyl 3-amino-2-((3,8-dimethoxynaphthalen-2-yl)methyl)propanoate (**8a**).

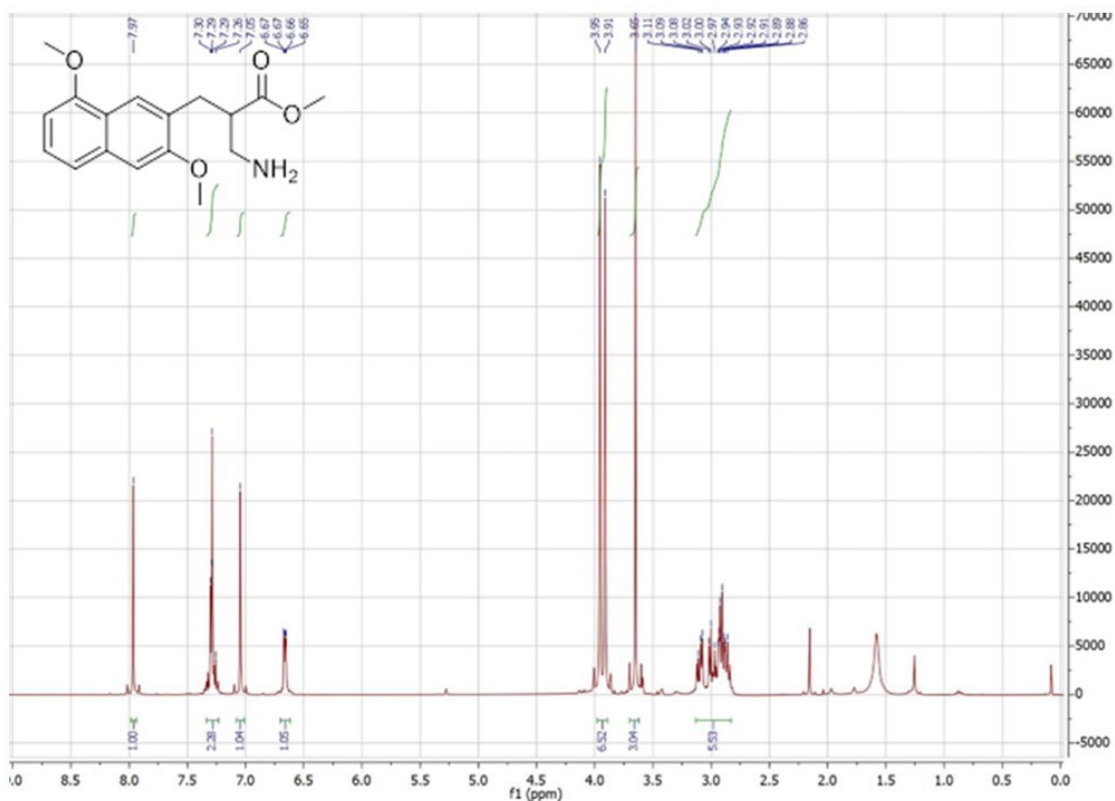

$^1\text{H}$  NMR of **8a** (400 MHz,  $\text{CDCl}_3$ )

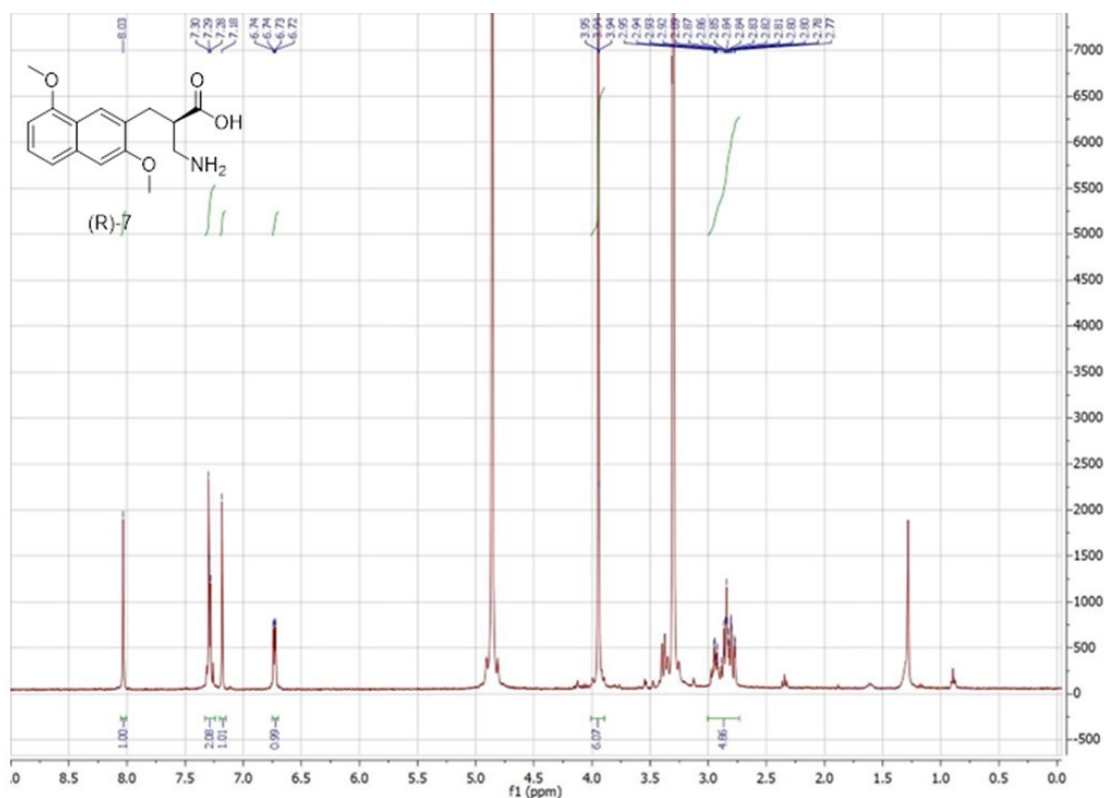

*(R)*-3-amino-2-((3,8-dimethoxynaphthalen-2-yl)methyl)propanoic acid *(R)*-7.

<sup>1</sup>H NMR of (*R*)-7 (400 MHz, MeOD)

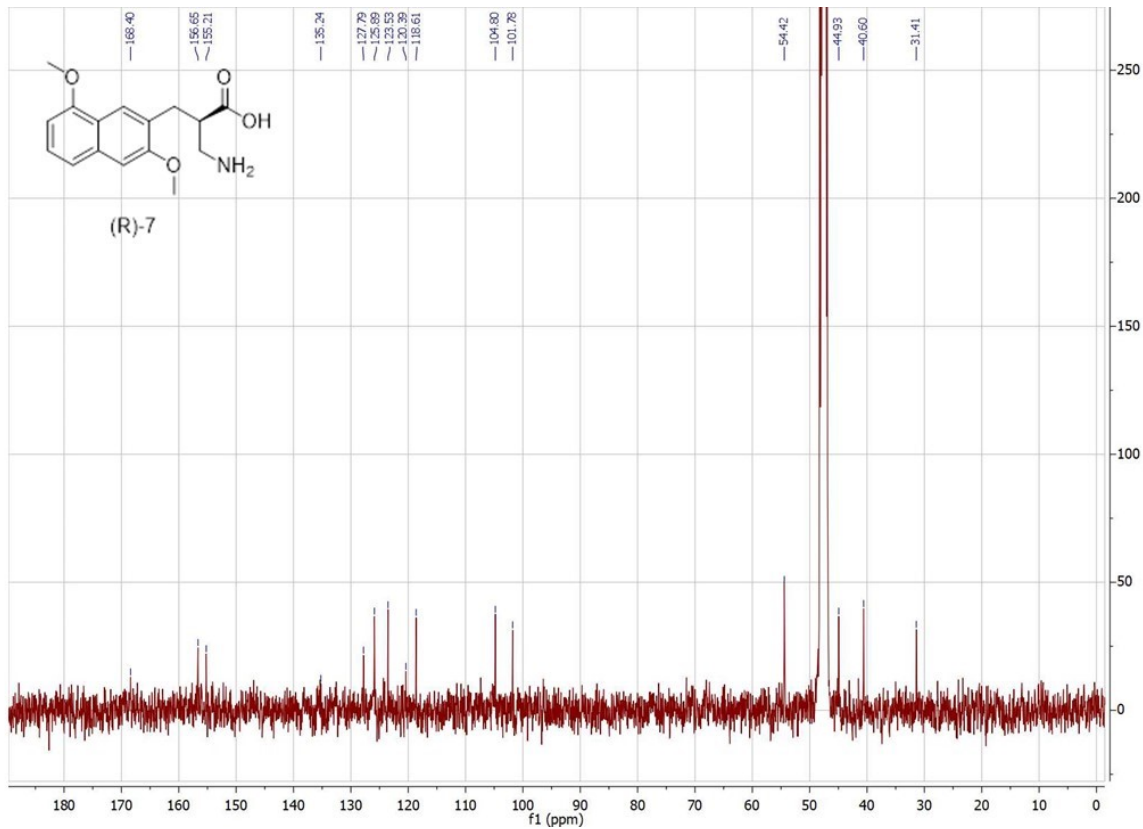

<sup>13</sup>C NMR of (*R*)-7 (101 MHz, MeOD)

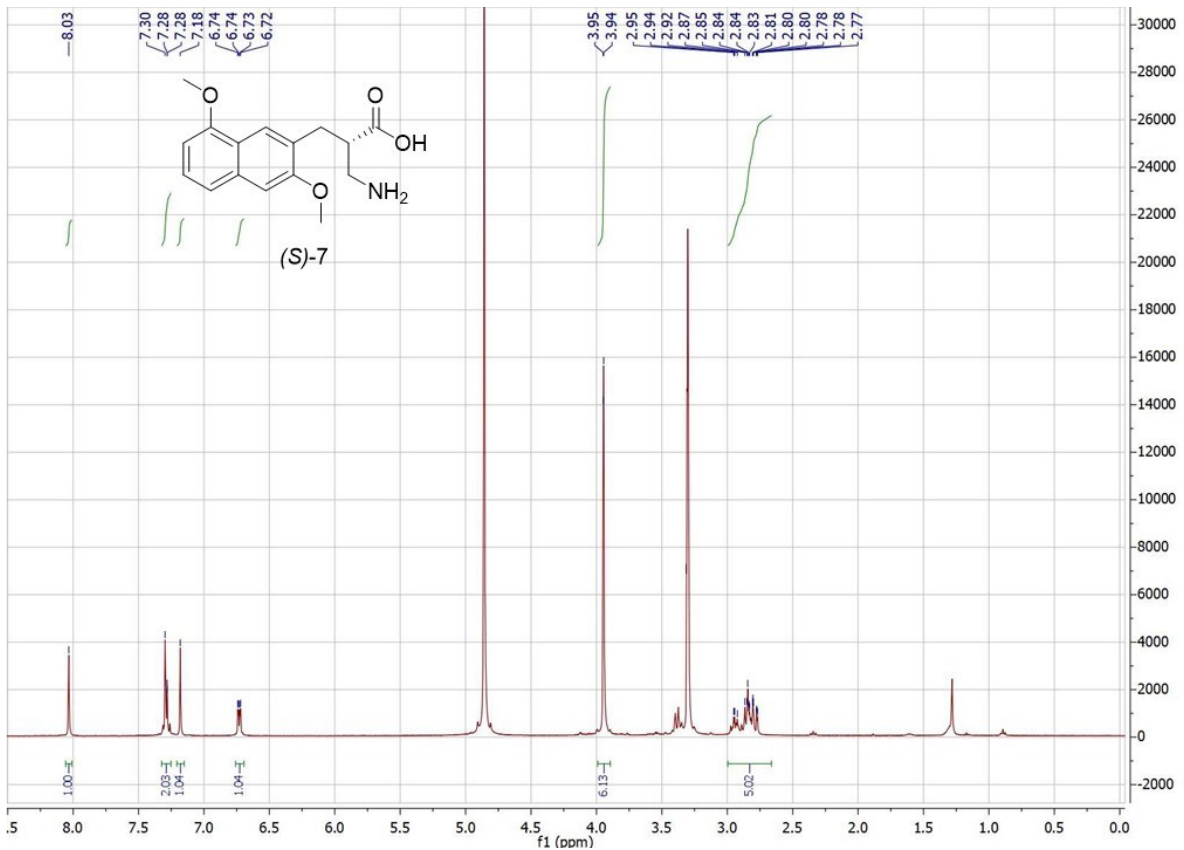

(*S*)-3-amino-2-((3,8-dimethoxynaphthalen-2-yl)methyl)propanoic acid (*S*)-7

$^1\text{H}$  NMR of (*S*)-7 (400 MHz, MeOD)

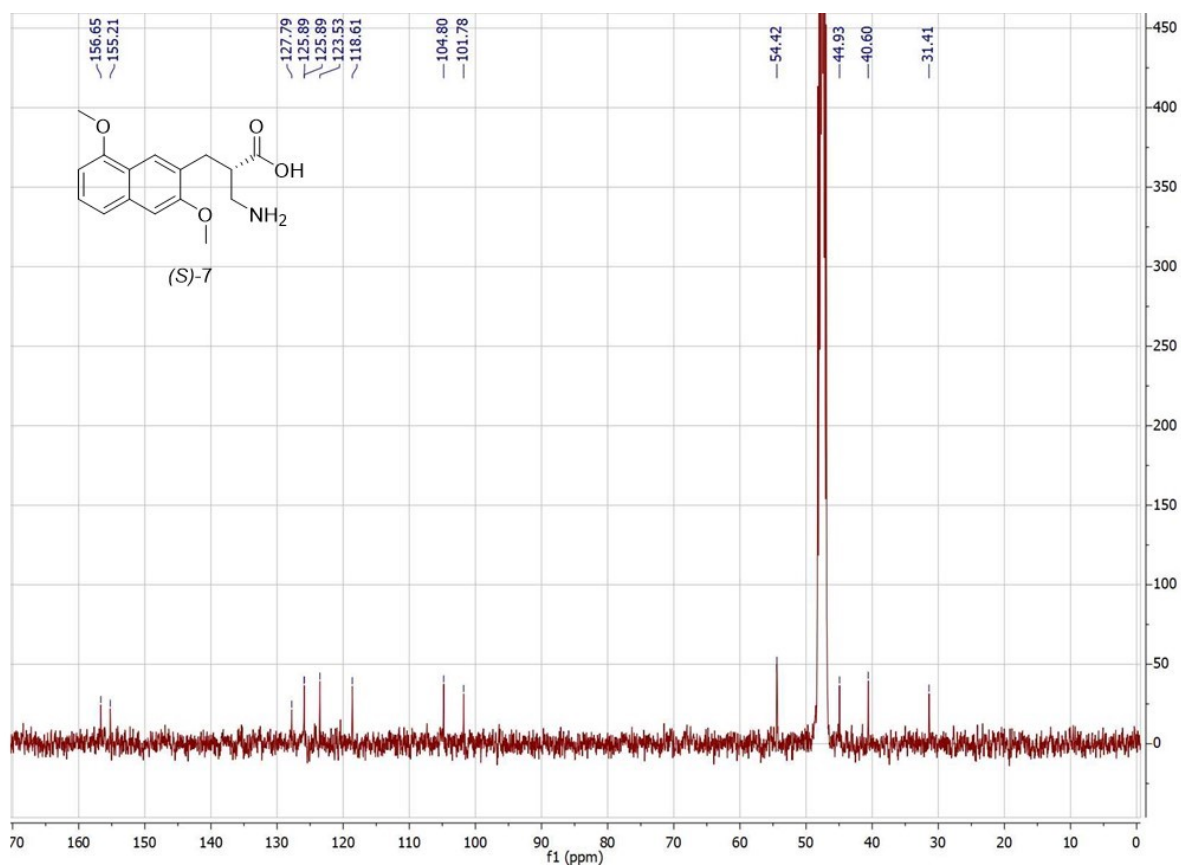

$^{13}\text{C}$  NMR of (*S*)-7 (101 MHz, MeOD)

(*3R, 4aS,R*)-3-carboxy-6-methoxy-2,3,4,4<sup>a</sup>,5,10-hexahydrobenzo[*g*]quinolin-1-ium chloride (**3*R*, 4*aS*,*R***)-(2).

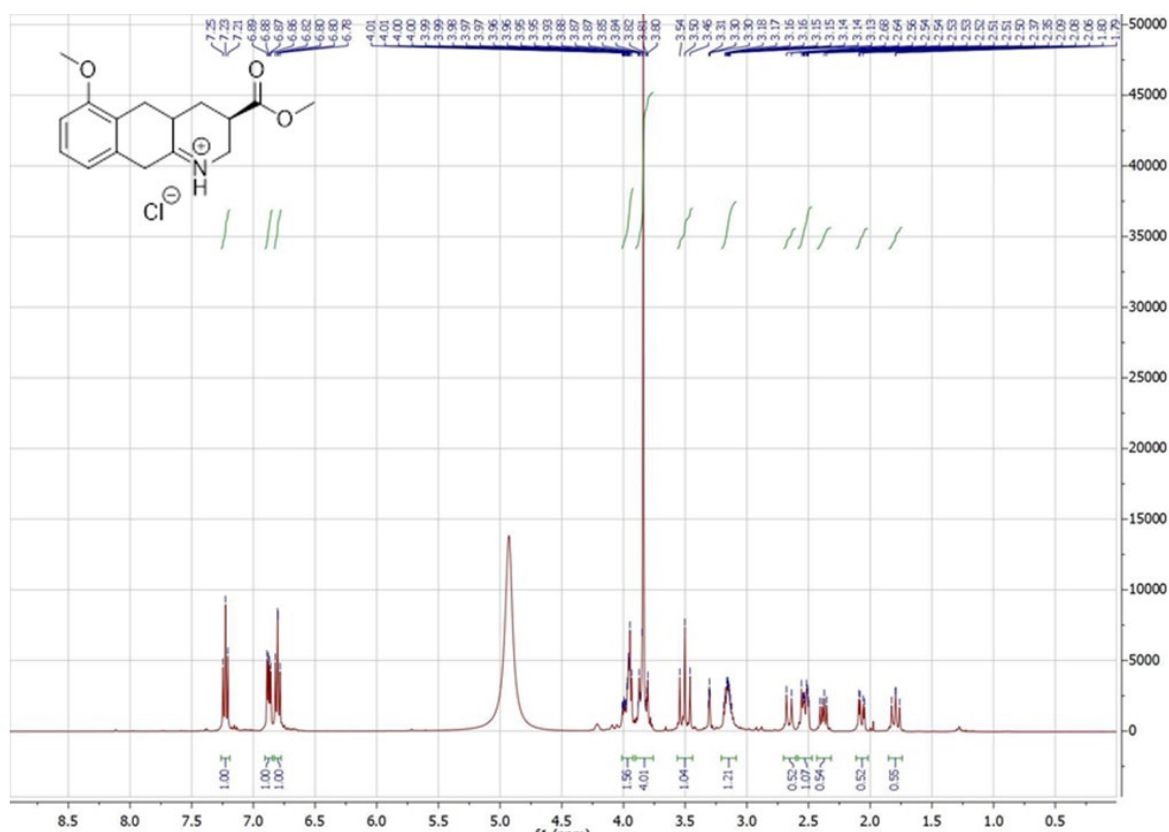

$^1\text{H}$  NMR of **(3*R*, 4*aS*,*R*)-(2)** (400 MHz, MeOD)

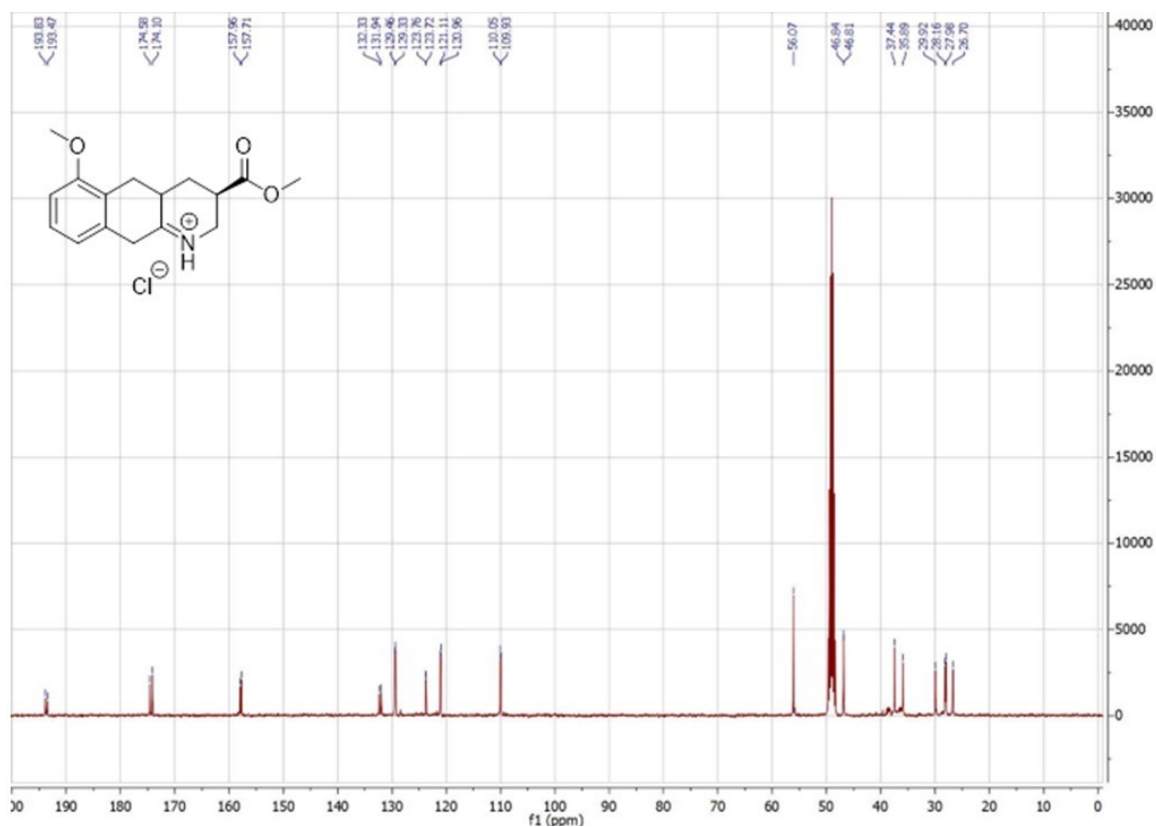

$^{13}\text{C}$  NMR of **(3*R*, 4*aS*,*R*)-(2)** (101 MHz, MeOD)

Methyl (3*R*,4*aR*,10*aR*)-6-methoxy-1,2,3,4,4<sup>a</sup>,5,10,10<sup>a</sup>-octahydrobenzo[*g*]quinoline-3-carboxylate

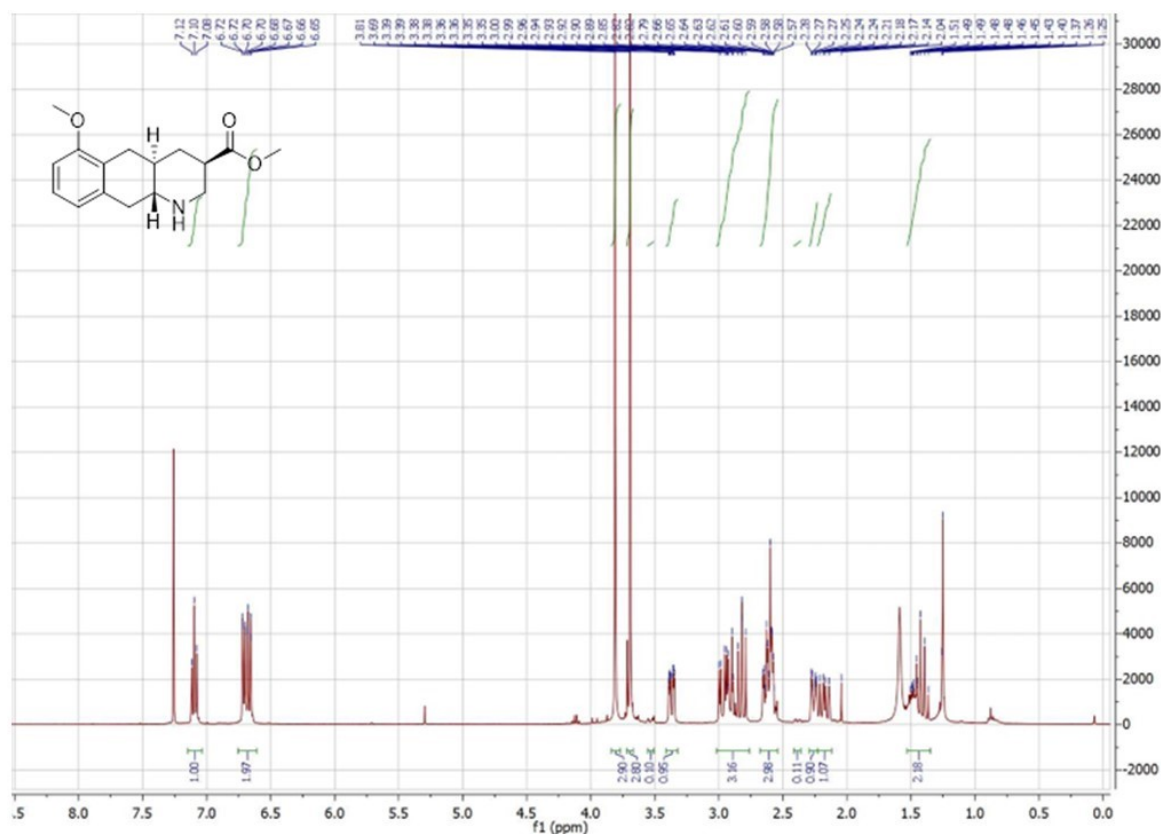

[(3*R*,4*aR*,10*aR*)-3a].

<sup>1</sup>H NMR of [(3*R*,4*aR*,10*aR*)-3a] (400 MHz, CDCl<sub>3</sub>)

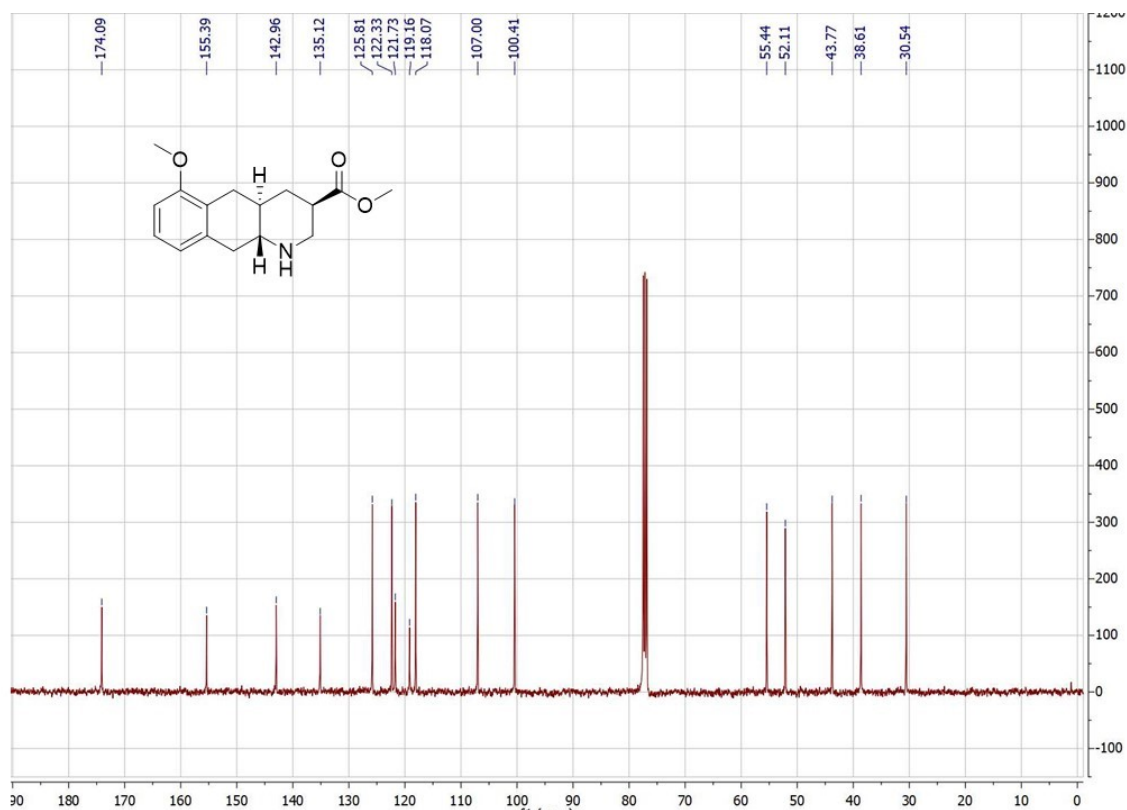

$^{13}\text{C}$  NMR of [(3*R*,4*aR*,10*aR*)-3*a*] (101 MHz,  $\text{CDCl}_3$ )

(3*R*,4*aR*,10*aR*)-6-methoxy-3-(methoxycarbonyl)-1,2,3,4,4*a*,5,10,10*a*-octahydrobenzo[*g*]quinolin-1-ium 4-methylbenzenesulfonate [(3*R*,4*aR*,10*aR*)-4].

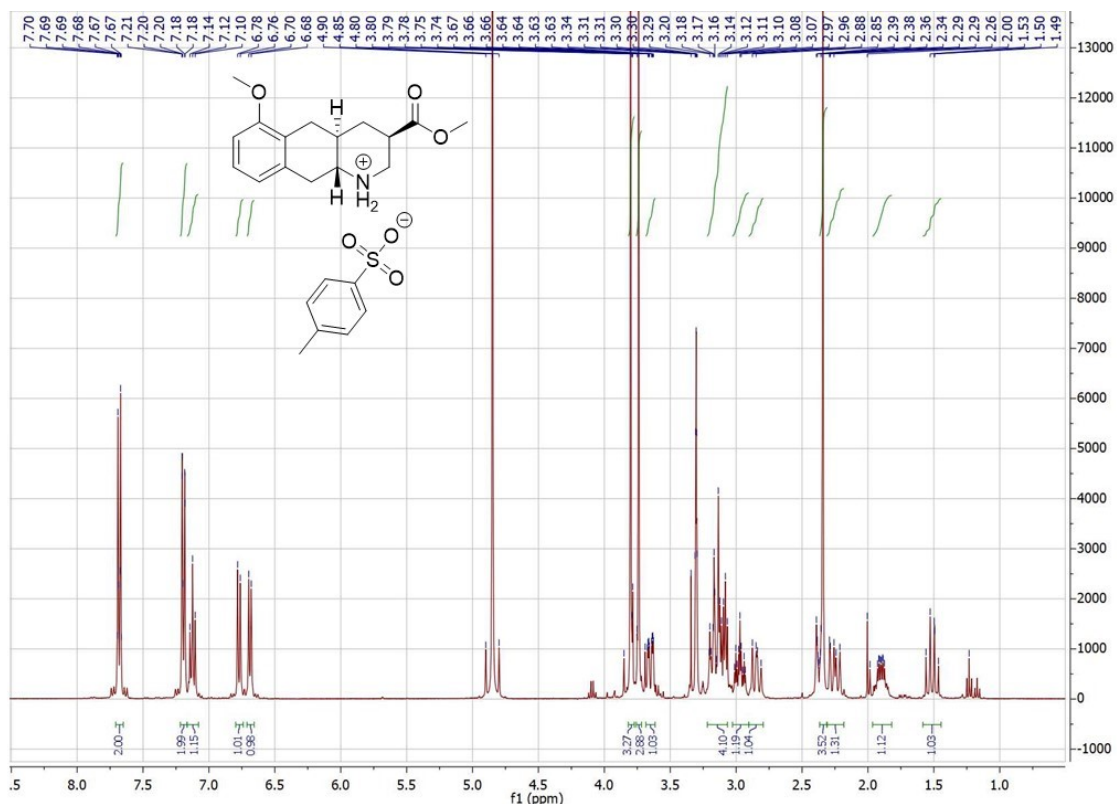

$^1\text{H}$  NMR of [(3*R*,4*aR*,10*aR*)-4] (400 MHz, MeOD)

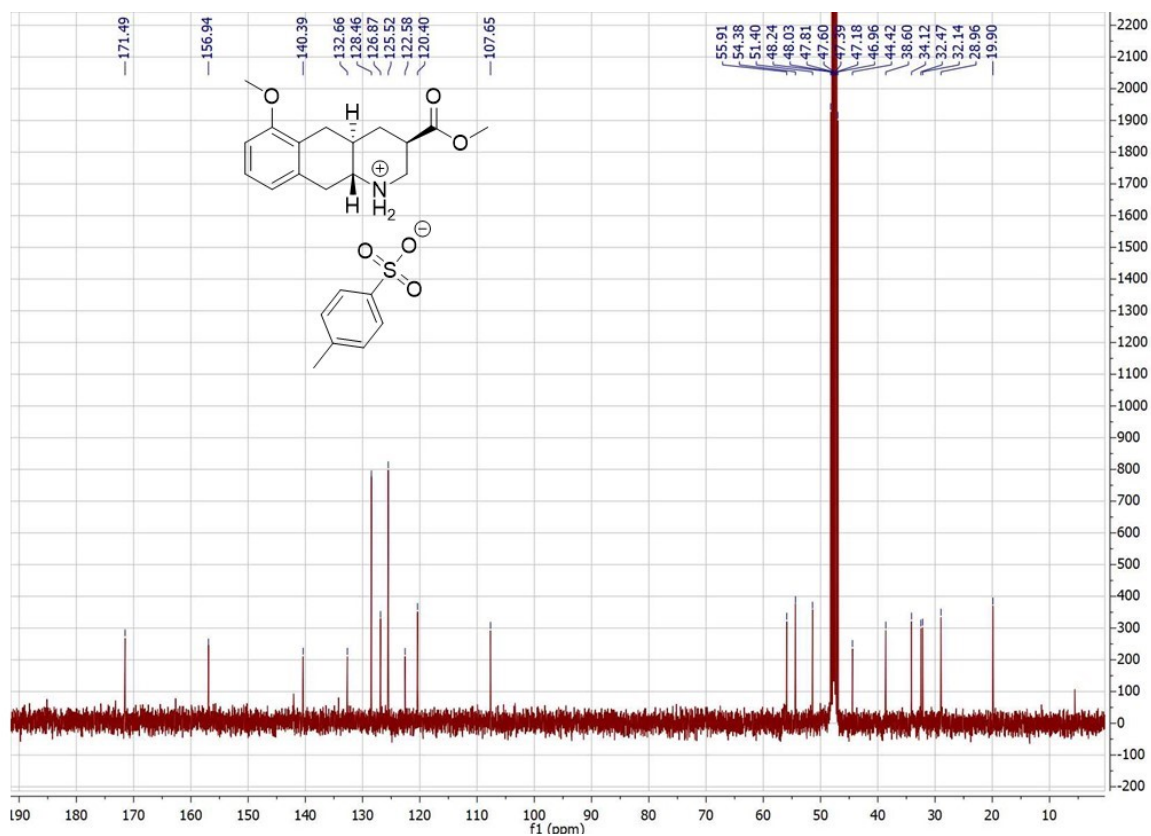



$^{13}\text{C}$  NMR of [(3*R*,4*aR*,10*aR*)-4] (101 MHz, MeOD)

Methyl (3*R*,4*aR*,10*aR*)-6-methoxy-1-propyl-1,2,3,4,4*a*,5,10,10*a*-octahydrobenzo[*g*]quinoline-3-carboxylate [(3*R*,4*aR*,10*aR*)-10].

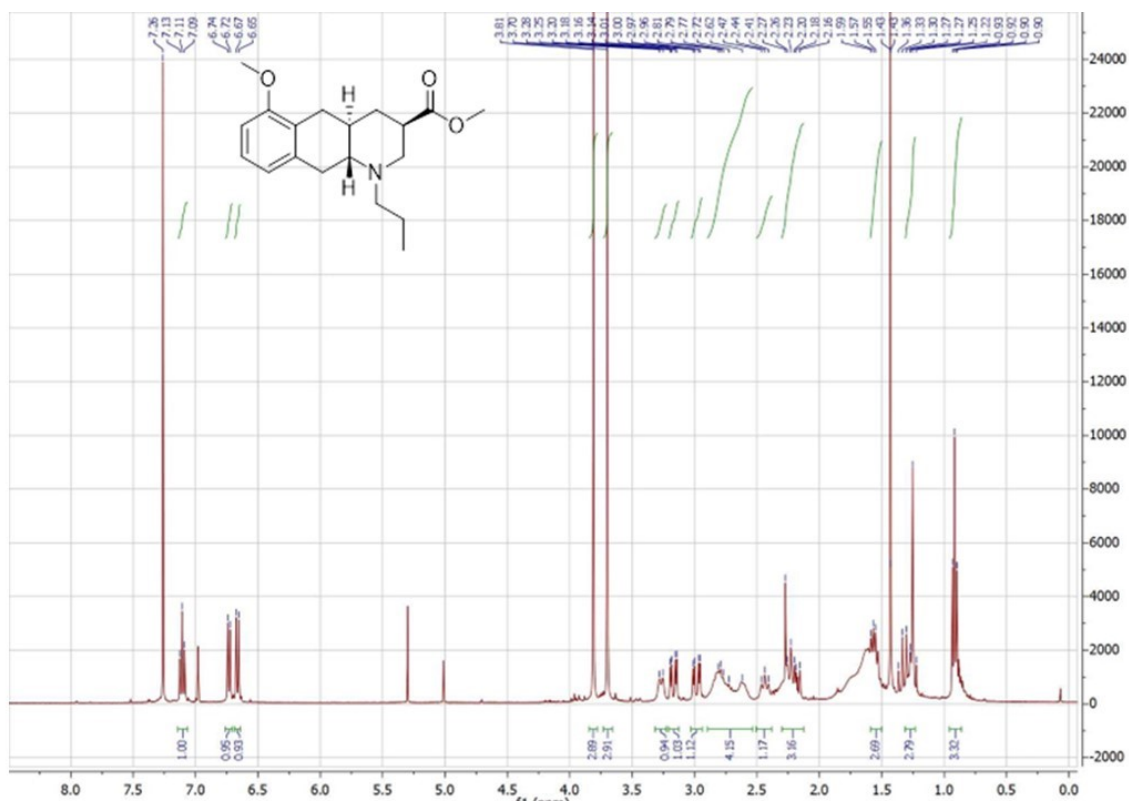

$^1\text{H}$  NMR of [(3*R*,4*aR*,10*aR*)-10] (400 MHz,  $\text{CDCl}_3$ )

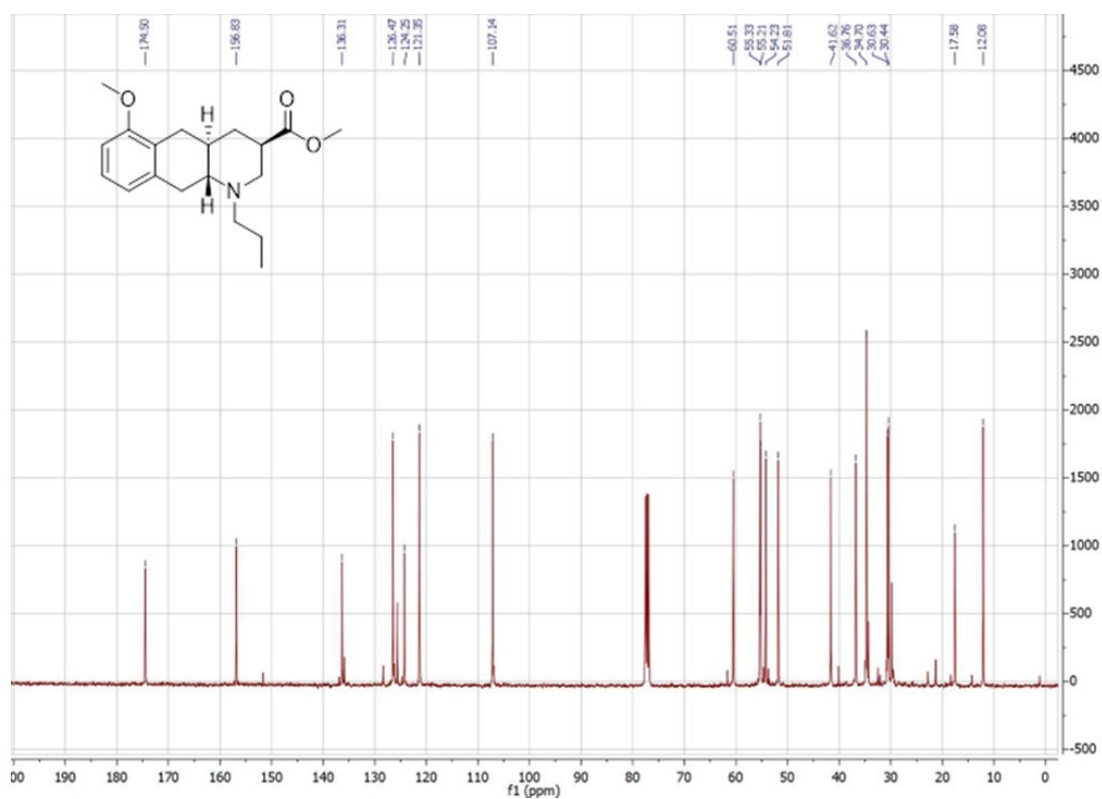

$^{13}\text{C}$  NMR of [(3*R*,4*aR*,10*aR*)-10] (101 MHz,  $\text{CDCl}_3$ )

Methyl (3*S*,4*aR*,10*aR*)-6-methoxy-1-propyl-1,2,3,4,4*a*,5,10,10*a*-octahydrobenzo[*g*]quinoline-3-carboxylate

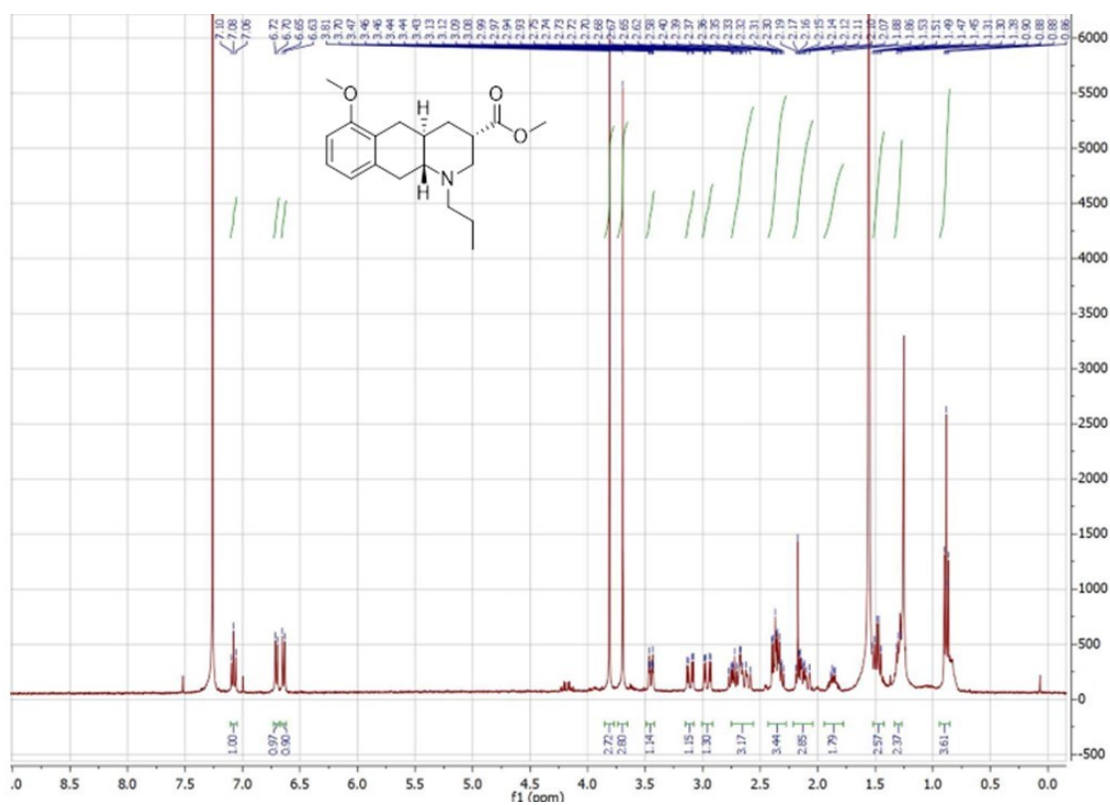

[(3*S*,4*aR*,10*aR*)-11].

$^1\text{H}$  NMR of [(3*S*,4*aR*,10*aR*)-11] (400 MHz,  $\text{CDCl}_3$ )

$^{13}\text{C}$  NMR of [(3*S*,4*aR*,10*aR*)-11] (101 MHz,  $\text{CDCl}_3$ )

### Computational section:

The Conformational space was investigated with the Conformer-Rotamer Ensemble Sampling Tool CREST<sup>8</sup>, which combines semiempirical tight-binding methods xTB<sup>9</sup> with a meta-dynamics driven search algorithm. Calculation was performed using Hamiltonian GFN2-xTB<sup>10</sup> and implicit solvation model GBSA<sup>11,12</sup> (solvent=methanol). The Conformer energy range was fixed at 6 kcal/mol.

All obtained structures were further optimized at the DFT-D3 level with the Gaussian 16 package<sup>13</sup>, employing the functional PW6B95D3<sup>14</sup> and def2-SVP basis set.<sup>15</sup> Solvent (methanol) was simulated by PCM model.<sup>16</sup> Bery analytical gradient optimization routines were applied for optimization of the minima on the PES.<sup>17</sup> After removing doubles, only the structures inside an energy range of 6.00 Kcal/mol were considered for analytical frequency calculations (T = 298.15 K and 1 atm pressure) to verify that minima had no imaginary frequencies. Free Energies, obtained by frequency calculation, were corrected with the single point energy obtained using the larger basis def2-QZVPP,<sup>15</sup> solvent (methanol) was also included (PCM model).

### Bibliography:

- 8) P. Pracht, F. Bohle, S. Grimme, *Phys. Chem. Chem. Phys.*, **2020**,22, 7169-7192.
- 9) C. Bannwarth, E. Caldeweyher, S. Ehlert, A. Hansen, P. Pracht, J. Seibert, S. Spicher, S. Grimme, *WIREs*

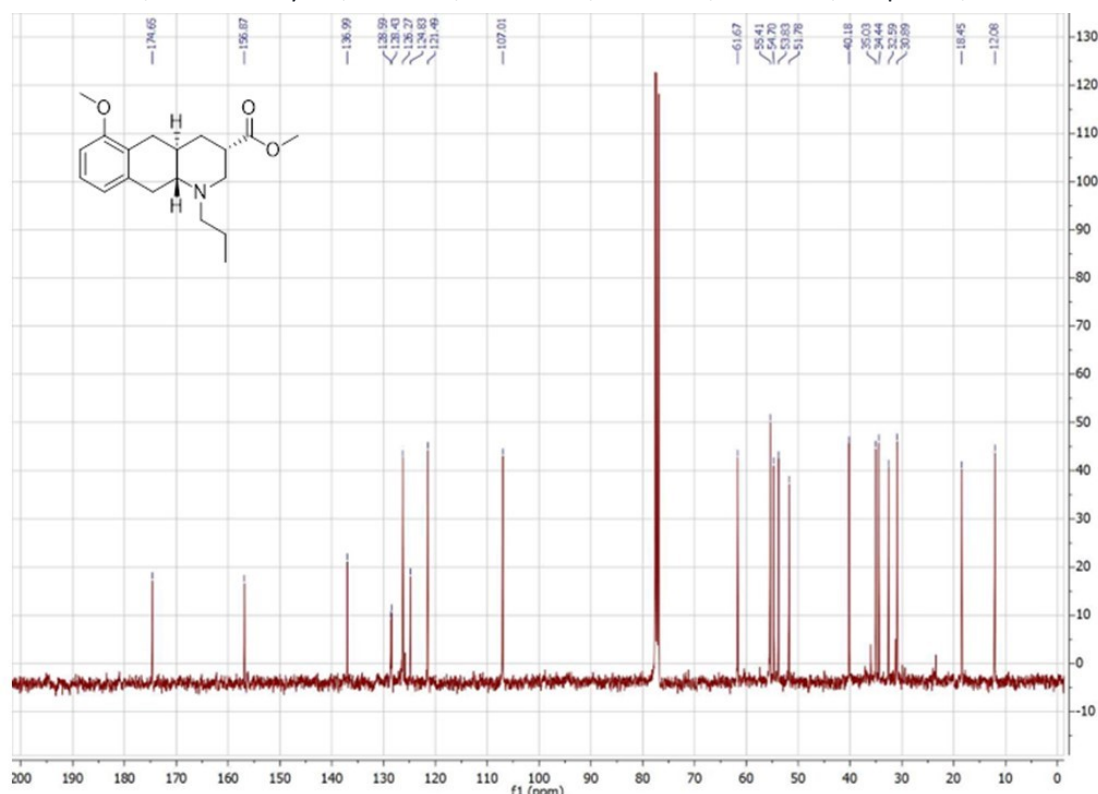

*Comput. Mol. Sci.*, **2020**, 11, e01493.

10) P. Pracht, E. Caldeweyher, S. Ehlert, S. Grimme, *ChemRxiv*, **2019**, preprint.

11) J. Mongan; C. Simmerling; J. A. McCammon; D. A. Case, A. Onufriev, *Chem. Theory Comput.* **2007**, 3, 1, 156–169

12) Lange, A. W.; Herbert, J. M., *J. Chem. Theory Comput.* **2012**, 8, 1999–2011. (GBSA)

- 13) Gaussian 16, Revision A.03, M. J Frisch, G. W. Trucks, H. B. Schlegel, G. E. Scuseria, M. A. Robb, J. R. Cheeseman, G. Scalmani, V. Barone, G. A. Petersson, H. Nakatsuji, X. Li, M. Caricato, A. V. Marenich, J. Bloino, B. G. Janesko, R. Gomperts, B. Mennucci, H. P. Hratchian, J. V. Ortiz, A. F. Izmaylov, J. L. Sonnenberg, D. Williams-Young, F. Ding, F. Lipparini, F. Egidi, J. Goings, B. Peng, A. Petrone, T. Henderson, D. Ranasinghe, V. G. Zakrzewski, J. Gao, N. Rega, G. Zheng, W. Liang, M. Hada, M. Ehara, K. Toyota, R. Fukuda, J. Hasegawa, M. Ishida, T. Nakajima, Y. Honda, O. Kitao, H. Nakai, T. Vreven, K. Throssell, J. A. Jr. Montgomery, J. E. Peralta, F. Ogliaro, M. J. Bearpark, J. J. Heyd, E. N. Brothers, K. N. Kudin, V. N. Staroverov, T. A. Keith, R. Kobayashi, J. Normand, K. Raghavachari, A. P. Rendell, J. C. Burant, S. S. Iyengar, J. Tomasi, M. Cossi, J. M. Millam, M. Klene, C. Adamo, R. Cammi, J. W. Ochterski, R. L. Martin, K. Morokuma, O. Farkas, J. B. Foresman, D. J. Fox, *Gaussian Inc., Wallingford CT*, **2016**.
- 14) Y. Zhao and D. G. Truhlar, *J. Phys. Chem. A*, **2005**, 109, 5656.
- 15) F. Weigend and R. Ahlrichs, *Phys. Chem. Chem. Phys.*, **2005**, 7, 3297-305.
- 16) Tomasi, J.; Mennucci, B.; Cammi, R. *Chem. Rev.* **2005**, 105, 2999-3093.
- 17) H. B. Schlegel, *J. Comp. Chem.*, **1982**, 3, 214-218.

**Table S-3.** Conformers of enamine D (def2-SVP Electronic Energy (EE), def2-SVP Gibbs Energy (GE); def2-QZVPP Electronic Energy (EE), Corrected G Energy (corr-GE).

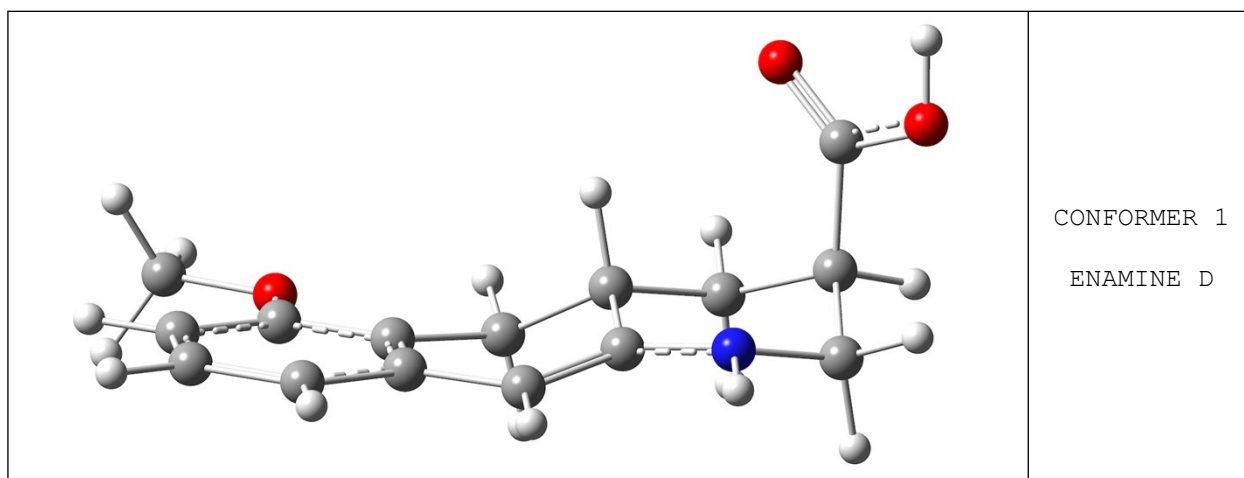

| CONFORMER | EE-DEF2SVP (Eh) | GE-DEF2SVP (Eh) | EE-DEFQZVPP (Eh) | corr-GE-DEF2QZVPP (Eh)       |
|-----------|-----------------|-----------------|------------------|------------------------------|
| conf1     | -862.7649041370 | -862.5061430000 | -863.7671553560  | -863.5083942190 <sup>a</sup> |
| conf2     | -862.7646417610 | -862.5059180000 | -863.7667481460  | -863.5080243850              |
| conf3     | -862.7594918160 | -862.5018590000 | -863.7627406490  | -863.5051078330              |
| conf4     | -862.7581920870 | -862.5010920000 | -863.7614687140  | -863.5043686270              |
| conf5     | -862.7596438490 | -862.5024390000 | -863.7631773330  | -863.5059724840              |
| conf6     | -862.7564511200 | -862.4992720000 | -863.7605802540  | -863.5034011340              |
| conf7     | -862.7579044090 | -862.4998250000 | -863.7621031700  | -863.5040237610              |
| conf8     | -862.7563414820 | -862.4988620000 | -863.7601721340  | -863.5026926520              |
| conf9     | -862.7543461800 | -862.4967950000 | -863.7592683210  | -863.5017171410              |
| conf10    | -862.7662609110 | -862.5056280000 | -863.7694909020  | -863.5088579910              |
| conf11    | -862.7590837990 | -862.5009520000 | -863.7625570770  | -863.5044252780              |
| conf12    | -862.7546532560 | -862.4969840000 | -863.7593460690  | -863.5016768130              |

<sup>a</sup>Most Stable Conformer. Conformer conf10 with intramolecular H-bond between nitrogen and carboxylic group was not considered as more stable conformer because reasonably not present in protic solvent (methanol) and basic environment.

**Table S-4.** Conformers of imine *cis*-2: def2-SVP Electronic Energy (EE), def2-SVP Gibbs Energy (GE); def2-QZVPP Electronic Energy (EE), Corrected G Energy (corr-GE).

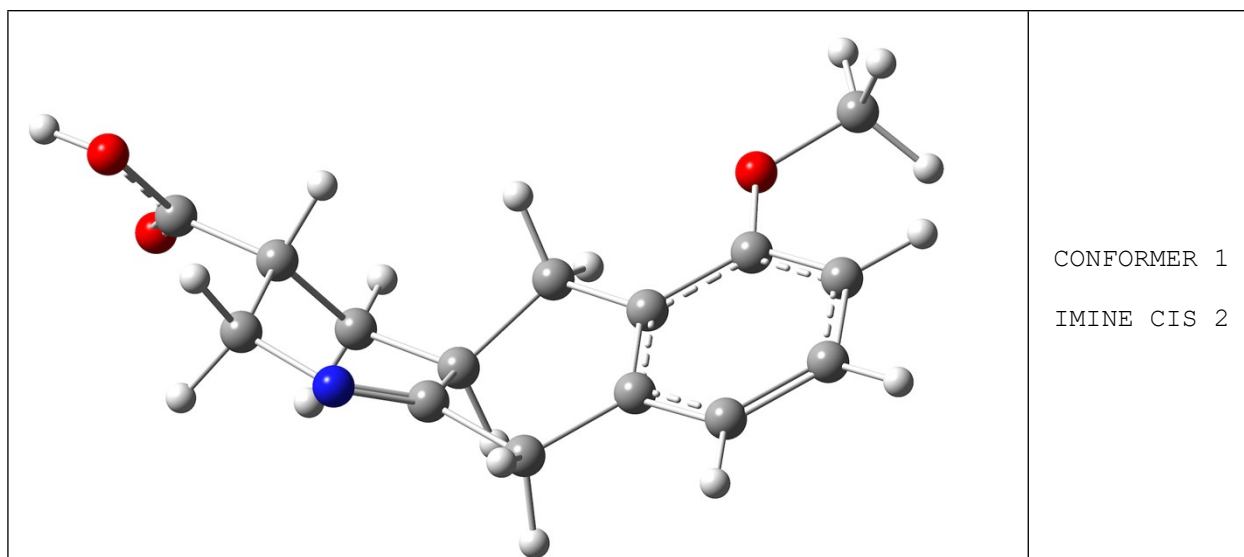

CONFORMER 1  
IMINE CIS 2

CONFORMER EE-DEF2SVP (Eh) GE-DEF2SVP (Eh) EE-DEFQZVPP (Eh) corr-GE-DEF2QZVPP (Eh)

|        |                |                |                |                             |
|--------|----------------|----------------|----------------|-----------------------------|
| conf1  | -862.756363358 | -862.499159000 | -863.762742110 | -863.505537752 <sup>a</sup> |
| conf2  | -862.755966034 | -862.498930000 | -863.761034397 | -863.503998363              |
| conf3  | -862.754929470 | -862.497990000 | -863.761893338 | -863.504953868              |
| conf4  | -862.756520786 | -862.499582000 | -863.761804729 | -863.504865943              |
| conf5  | -862.755926729 | -862.498989000 | -863.761046404 | -863.504108675              |
| conf6  | -862.754253800 | -862.496295000 | -863.759471002 | -863.501512202              |
| conf7  | -862.754323843 | -862.497135000 | -863.761121828 | -863.503932985              |
| conf8  | -862.754084319 | -862.497672000 | -863.759902244 | -863.503489925              |
| conf9  | -862.754005890 | -862.496802000 | -863.760957551 | -863.503753661              |
| conf10 | -862.754084314 | -862.497718000 | -863.759902822 | -863.503536508              |
| conf11 | -862.755929194 | -862.499474000 | -863.761016760 | -863.504561566              |
| conf12 | -862.752183864 | -862.495816000 | -863.759926921 | -863.503559057              |
| conf13 | -862.752767366 | -862.495243000 | -863.758550385 | -863.501026019              |
| conf14 | -862.751844743 | -862.494977000 | -863.759747901 | -863.502880158              |
| conf15 | -862.751409234 | -862.494093000 | -863.759112983 | -863.501796749              |
| conf16 | -862.750506564 | -862.494328000 | -863.757044762 | -863.500866198              |
| conf17 | -862.751449354 | -862.494544000 | -863.758125334 | -863.501219980              |
| conf18 | -862.750926408 | -862.493603000 | -863.757822996 | -863.500499588              |
| conf19 | -862.748698954 | -862.490697000 | -863.755412178 | -863.497410224              |
| conf20 | -862.750897929 | -862.493226000 | -863.757800862 | -863.500128933              |

<sup>a</sup>Most Stable Conformer.

**Table S-5.** Conformers of enamine E: def2-SVP Electronic Energy (EE), def2-SVP Gibbs Energy (GE); def2-QZVPP Electronic Energy (EE), Corrected G Energy (corr-GE).

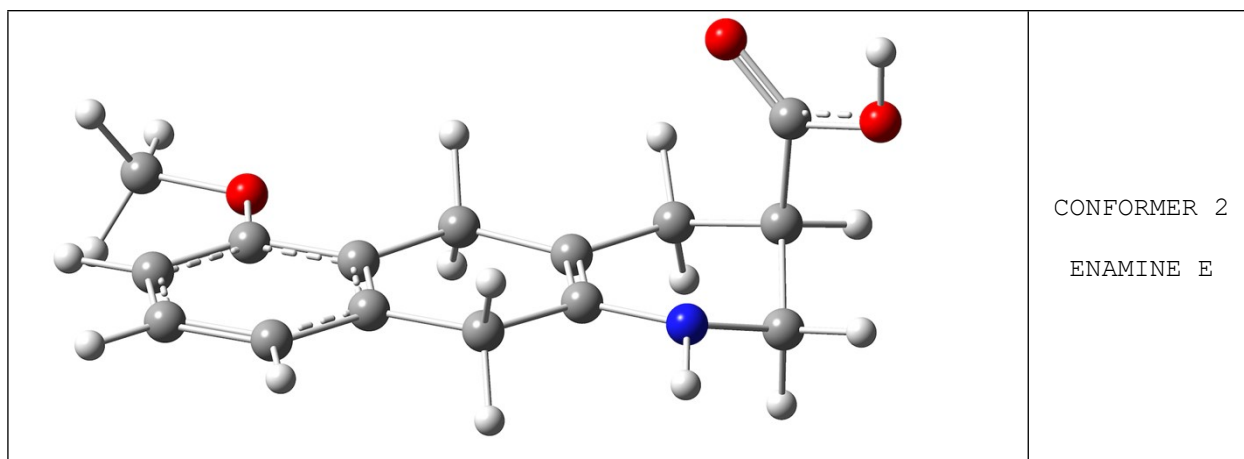

CONFORMER EE-DEF2SVP (Eh) GE-DEF2SVP (Eh) EE-DEFQZVPP (Eh) corr-GE-DEF2QZVPP (Eh)

|        |                |                |                |                             |
|--------|----------------|----------------|----------------|-----------------------------|
| conf1  | -862.763748460 | -862.505171000 | -863.768032389 | -863.509454929              |
| conf2  | -862.760024957 | -862.503326000 | -863.764093996 | -863.507395039 <sup>a</sup> |
| conf3  | -862.759647187 | -862.502218000 | -863.764640522 | -863.507211335              |
| conf4  | -862.759384025 | -862.503200000 | -863.763219899 | -863.507035874              |
| conf5  | -862.758727010 | -862.503181000 | -863.762527277 | -863.506981267              |
| conf6  | -862.758709376 | -862.502682000 | -863.762659871 | -863.506632495              |
| conf7  | -862.758334427 | -862.501925000 | -863.763439082 | -863.507029655              |
| conf8  | -862.757449729 | -862.501789000 | -863.762802668 | -863.507141939              |
| conf9  | -862.756679750 | -862.500671000 | -863.762499236 | -863.506490486              |
| conf10 | -862.756482340 | -862.500028000 | -863.762327183 | -863.505872843              |
| conf11 | -862.754663893 | -862.498169000 | -863.759752889 | -863.503257996              |

-----  
<sup>a</sup>Most Stable Conformer. Conformer conf1 with intramolecular H-bond between nitrogen and carboxylic group was not considered as more stable conformer because reasonably not present in protic solvent (methanol) and basic environment.

**Table S-6.** Conformers of imine *trans*-2: def2-SVP Electronic Energy (EE), def2-SVP Gibbs Energy (GE); def2-QZVPP Electronic Energy (EE), Corrected G Energy (corr-GE).

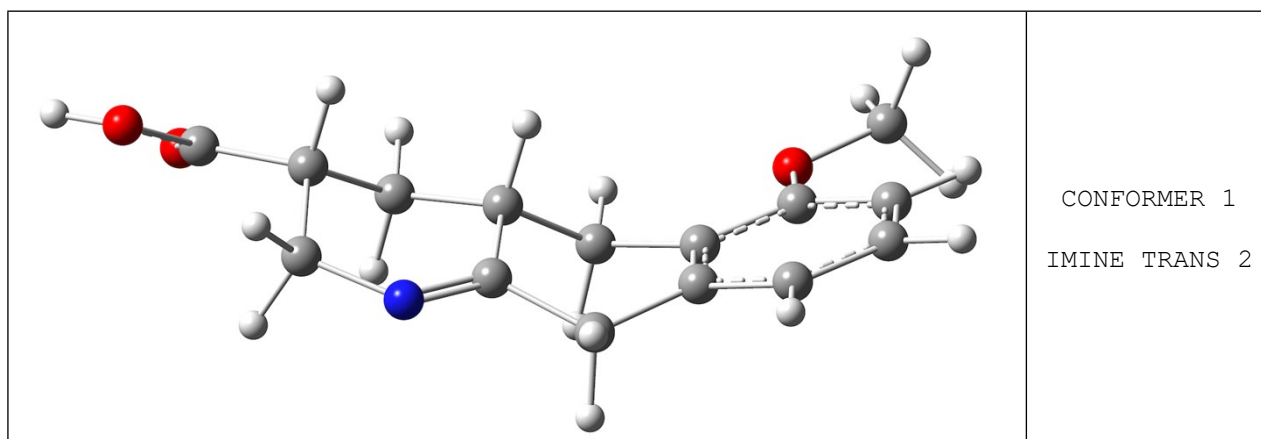

CONFORMER EE-DEF2SVP (Eh) GE-DEF2SVP (Eh) EE-DEFQZVPP (Eh) corr-GE-DEF2QZVPP (Eh)

|       |                |                |                |                             |
|-------|----------------|----------------|----------------|-----------------------------|
| conf1 | -862.755447425 | -862.499205000 | -863.761827821 | -863.505585396 <sup>a</sup> |
| conf2 | -862.753984482 | -862.497638000 | -863.760960586 | -863.504614104              |

|        |                |                |                |                |
|--------|----------------|----------------|----------------|----------------|
| conf3  | -862.753817507 | -862.496851000 | -863.760302357 | -863.503335850 |
| conf4  | -862.753753135 | -862.496547000 | -863.759893025 | -863.502686890 |
| conf5  | -862.752336192 | -862.495325000 | -863.759406635 | -863.502395443 |
| conf6  | -862.755900337 | -862.497379000 | -863.761541013 | -863.503019676 |
| conf7  | -862.755313528 | -862.497927000 | -863.761090124 | -863.503703596 |
| conf8  | -862.755843730 | -862.497931000 | -863.760945244 | -863.503032514 |
| conf9  | -862.754099765 | -862.495365000 | -863.759681801 | -863.500947036 |
| conf10 | -862.753607597 | -862.495509000 | -863.758864937 | -863.500766340 |
| conf11 | -862.754462843 | -862.497502000 | -863.758992334 | -863.502031491 |
| conf12 | -862.754369116 | -862.496719000 | -863.759683190 | -863.502033074 |
| conf13 | -862.753967755 | -862.495576000 | -863.760881555 | -863.502489800 |
| conf14 | -862.752988678 | -862.494620000 | -863.760014008 | -863.501645330 |
| conf15 | -862.750470178 | -862.494143000 | -863.758093771 | -863.501766593 |
| conf16 | -862.750477186 | -862.493467000 | -863.757988930 | -863.500978744 |
| conf17 | -862.750664761 | -862.493976000 | -863.758516807 | -863.501828046 |
| conf18 | -862.748808696 | -862.491171000 | -863.756463120 | -863.498825424 |
| conf19 | -862.748870289 | -862.492017000 | -863.756449266 | -863.499595977 |

-----  
<sup>a</sup>Most Stable Conformer.

**Table S-7.** Conformers of enamine F Summary: def2-SVP Electronic Energy (EE), def2-SVP Gibbs Energy (GE); def2-QZVPP Electronic Energy (EE), Corrected G Energy (corr-GE).

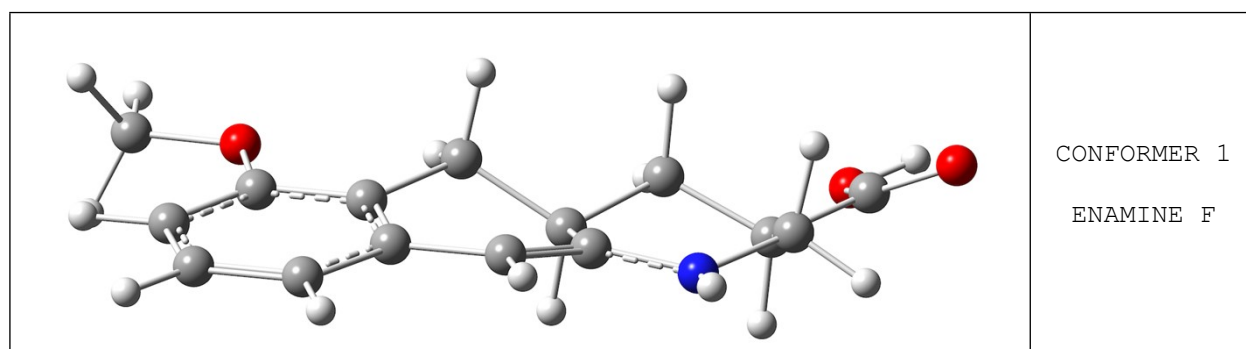

| CONFORMER | EE-DEF2SVP (Eh) | GE-DEF2SVP (Eh) | EE-DEFQZVPP (Eh) | corr-GE (Eh)                |
|-----------|-----------------|-----------------|------------------|-----------------------------|
| conf1     | -862.763828747  | -862.505903000  | -863.767081470   | -863.509155723 <sup>a</sup> |
| conf2     | -862.761768993  | -862.503956000  | -863.765917096   | -863.508104103              |
| conf3     | -862.763517129  | -862.505998000  | -863.766754242   | -863.509235113              |
| conf4     | -862.759723534  | -862.501688000  | -863.761355383   | -863.503319849              |
| conf5     | -862.760650701  | -862.502794000  | -863.761871832   | -863.504015131              |
| conf6     | -862.759698676  | -862.502190000  | -863.763111838   | -863.505603162              |
| conf7     | -862.757841158  | -862.499382000  | -863.760857950   | -863.502398792              |
| conf8     | -862.757730192  | -862.499917000  | -863.760449483   | -863.502636291              |
| conf9     | -862.755022032  | -862.496745000  | -863.758782048   | -863.500505016              |
| conf10    | -862.761008961  | -862.500751000  | -863.765363088   | -863.505105127              |
| conf11    | -862.758885210  | -862.500907000  | -863.763497846   | -863.505519636              |

-----  
<sup>a</sup>Most Stable Conformer.

CARTESIAN COORDINATES and THERMOCHEMICAL DATA

CONFORMERS of ENAMINE D

CONFORMER 1

CARTESIAN COORDINATES



|   |               |               |               |
|---|---------------|---------------|---------------|
| C | -0.6393240578 | -0.7851853985 | 0.7992706276  |
| C | 0.7394475607  | -0.3853967870 | 0.2946351358  |
| C | -0.1502304035 | 1.9279506936  | 0.2157007499  |
| H | -0.6525270373 | -0.6650105866 | 1.8971137317  |
| H | -0.8152700987 | -1.8475339666 | 0.6036323861  |
| H | -0.0051724505 | 3.0079286153  | 0.1775827965  |
| H | 0.8066612200  | -0.6359665519 | -0.7768571193 |
| C | 1.8364952328  | -1.1671408930 | 1.0102696833  |
| C | 3.2615688632  | 0.8600512196  | 1.1083493463  |
| C | 3.2191668039  | -0.6082984126 | 0.7182358816  |
| H | 1.7786538546  | -2.2209683708 | 0.7178458409  |
| H | 1.6703589500  | -1.1190446944 | 2.0949908654  |
| H | 4.2236087952  | 1.3021467472  | 0.8356386092  |
| H | 3.1613730069  | 0.9315288034  | 2.2045273400  |
| H | 3.9716227587  | -1.1394877717 | 1.3189574743  |
| C | 0.9237098403  | 1.1123367644  | 0.3680859342  |
| N | 2.2121704993  | 1.5789352847  | 0.4193844260  |
| C | -1.7364786931 | 0.0469225340  | 0.2091847617  |
| C | -1.4815627039 | 1.4066648117  | -0.0326889075 |
| C | -3.0140323147 | -0.4738333241 | -0.0284331683 |
| C | -2.5187387472 | 2.2283312855  | -0.5044545837 |
| H | -2.3238377099 | 3.2835382232  | -0.6888274531 |
| C | -3.7754022367 | 1.6950924762  | -0.7418506153 |
| H | -4.5747181190 | 2.3345771856  | -1.1132537132 |
| C | -4.0374471987 | 0.3452567230  | -0.5144228049 |
| H | -5.0285222760 | -0.0542640560 | -0.7061063222 |
| H | 2.2979821212  | 2.5857837628  | 0.4510986925  |
| C | 3.6229472530  | -0.8348905639 | -0.7226037046 |
| O | 3.0660332088  | -1.5815451673 | -1.4868672115 |
| O | 4.7080554700  | -0.1403837505 | -1.0632423588 |
| H | 4.9197804843  | -0.3540296139 | -1.9843996753 |
| O | -3.1826036055 | -1.7882351716 | 0.2521008401  |
| C | -4.4355610670 | -2.3748824369 | 0.0168509482  |
| H | -4.3482128737 | -3.4281251596 | 0.2954961816  |
| H | -5.2231640628 | -1.9077053826 | 0.6251676008  |
| H | -4.7230878646 | -2.3069199495 | -1.0420914156 |

Electronic Energy (RPW6B95D3/def2-SVP)= -862.764904137 (Hartree/Particle)

Dipole Moment= 3.6004 (Debye)

Number of imaginary frequencies 0

THERMOCHEMICAL DATA (Temperature 298.150 Kelvin. Pressure 1.00000 Atm)

Zero-point correction= 0.302773 (Hartree/Particle)

Sum of electronic and zero-point Energies= -862.462131

Sum of electronic and thermal Energies= -862.446041

Sum of electronic and thermal Enthalpies= -862.445096

Sum of electronic and thermal Free Energies= -862.506143

Electronic Energy SP (RPW6B95D3/def2-QZVPP)= -863.767155356 (Hartree/Particle)

Corrected Free Energy= -863.508394219 (Hartree/Particle)

-----  
CONFORMER 2

CARTESIAN COORDINATES

|   |               |               |               |
|---|---------------|---------------|---------------|
| C | -0.6012309631 | -0.7592644654 | 0.8246618332  |
| C | 0.7763079174  | -0.3467070090 | 0.3270943340  |
| C | -0.1476547708 | 1.9514784550  | 0.2041991433  |
| H | -0.6249633330 | -0.6214452962 | 1.9201483196  |
| H | -0.7587060295 | -1.8273066018 | 0.6451040316  |
| H | -0.0187905747 | 3.0328198119  | 0.1509915181  |
| H | 0.8562096558  | -0.6198969977 | -0.7399611073 |
| C | 1.8792562556  | -1.0861329033 | 1.0732382337  |

|   |               |               |               |
|---|---------------|---------------|---------------|
| C | 3.3093829759  | 0.9408557226  | 1.0690927428  |
| C | 3.2549017199  | -0.5344344306 | 0.7249286280  |
| H | 1.8199721308  | -2.1563323011 | 0.8518529784  |
| H | 1.7284839787  | -0.9696063233 | 2.1551409075  |
| H | 4.2494216313  | 1.3720109091  | 0.7130025538  |
| H | 3.2826698728  | 1.0476767087  | 2.1662530929  |
| H | 4.0155907396  | -1.0591031839 | 1.3214153345  |
| C | 0.9392375046  | 1.1547738283  | 0.3756635542  |
| N | 2.2161223066  | 1.6412182394  | 0.4315953143  |
| C | -1.7052893534 | 0.0465931310  | 0.2121683345  |
| C | -1.4680983781 | 1.4065643028  | -0.0471906116 |
| C | -2.9721965584 | -0.4977509892 | -0.0285236528 |
| C | -2.5146567152 | 2.2047017842  | -0.5392366321 |
| H | -2.3349720790 | 3.2601144187  | -0.7373600483 |
| C | -3.7607534480 | 1.6483384323  | -0.7791139136 |
| H | -4.5666422314 | 2.2700636624  | -1.1661986067 |
| C | -4.0042239112 | 0.2979146588  | -0.5348753566 |
| H | -4.9872888678 | -0.1196166104 | -0.7292266003 |
| H | 2.2931453211  | 2.6488196232  | 0.4362204324  |
| C | 3.6637443656  | -0.7602554022 | -0.7164398385 |
| O | 4.3870696737  | -0.0321861094 | -1.3458625697 |
| O | 3.1700815310  | -1.8919175780 | -1.2201345394 |
| H | 3.5039370238  | -1.9844711790 | -2.1253336701 |
| O | -3.1221244452 | -1.8105228668 | 0.2701534045  |
| C | -4.3635468086 | -2.4208514160 | 0.0342238860  |
| H | -4.6426728281 | -2.3761087501 | -1.0282006933 |
| H | -4.2622353708 | -3.4675877143 | 0.3320383631  |
| H | -5.1638383453 | -1.9557188713 | 0.6273353229  |

Electronic Energy (RPW6B95D3/def2-SVP)= -862.764641761 (Hartree/Particle)

Dipole Moment= 2.8048 (Debye)

Number of imaginary frequencies 0

THERMOCHEMICAL DATA (Temperature 298.150 Kelvin. Pressure 1.00000 Atm)

Zero-point correction= 0.302743 (Hartree/Particle)

Sum of electronic and zero-point Energies= -862.461899

Sum of electronic and thermal Energies= -862.445800

Sum of electronic and thermal Enthalpies= -862.444856

Sum of electronic and thermal Free Energies= -862.505918

Electronic Energy SP (RPW6B95D3/def2-QZVPP)= -863.766748146 (Hartree/Particle)

Corrected Free Energy= -863.508024385 (Hartree/Particle)

-----  
CONFORMER 3

CARTESIAN COORDINATES

|   |               |               |               |
|---|---------------|---------------|---------------|
| C | -0.5590269005 | -0.7066571406 | 0.7146546107  |
| C | 0.7898381272  | -0.1421859937 | 0.2935042768  |
| C | -0.2909998285 | 2.0977855875  | 0.4040452162  |
| H | -0.5953618653 | -0.7247001687 | 1.8181480082  |
| H | -0.6462612214 | -1.7477320437 | 0.3891120706  |
| H | -0.2338475214 | 3.1832322066  | 0.4821728597  |
| H | 0.9401703458  | -0.3382302056 | -0.7827677068 |
| C | 1.9349903931  | -0.7826877267 | 1.0653151490  |
| C | 3.2595516208  | 1.2108604082  | 0.2331439988  |
| C | 3.2972398575  | -0.2912002425 | 0.5506483660  |
| H | 1.8825852325  | -1.8758252013 | 1.0047512170  |
| H | 1.8383069598  | -0.5144843686 | 2.1244223338  |
| H | 3.3096869035  | 1.3365802286  | -0.8588202238 |
| H | 4.1378108638  | 1.7057222746  | 0.6576426593  |
| H | 4.0482361119  | -0.5113845510 | 1.3161501838  |
| C | 0.8379904447  | 1.3523875027  | 0.4919366631  |
| N | 2.0797540154  | 1.8507245317  | 0.7809716160  |

|   |               |               |               |
|---|---------------|---------------|---------------|
| C | -1.7185253556 | 0.0991730990  | 0.2089601612  |
| C | -1.5775358001 | 1.4935412064  | 0.1109649535  |
| C | -2.9505984219 | -0.4967601652 | -0.0846503575 |
| C | -2.6813933280 | 2.2699822350  | -0.2788377313 |
| H | -2.5747574259 | 3.3509911526  | -0.3529024627 |
| C | -3.8912312591 | 1.6628461756  | -0.5748992966 |
| H | -4.7418609964 | 2.2696709326  | -0.8814538246 |
| C | -4.0408129442 | 0.2801780232  | -0.4881108340 |
| H | -4.9965468500 | -0.1779584993 | -0.7230316798 |
| H | 2.1392655357  | 2.8582006062  | 0.8386187487  |
| C | 3.6659343551  | -1.1027694392 | -0.6682935856 |
| O | 3.5208717968  | -0.7614659808 | -1.8151865012 |
| O | 4.1373420202  | -2.3027848062 | -0.3305194847 |
| H | 4.2999941169  | -2.8005116274 | -1.1459367429 |
| O | -3.0095059221 | -1.8424266704 | 0.0603180858  |
| C | -4.2123984359 | -2.5027711157 | -0.2334486546 |
| H | -4.0385346045 | -3.5676772306 | -0.0592455708 |
| H | -5.0312547385 | -2.1624347568 | 0.4163382359  |
| H | -4.5112306631 | -2.3551532332 | -1.2810784157 |

Electronic Energy (RPW6B95D3/def2-SVP)= -862.759491816 (Hartree/Particle)

Dipole Moment= 3.1734 (Debye)

Number of imaginary frequencies 0

THERMOCHEMICAL DATA (Temperature 298.150 Kelvin. Pressure 1.00000 Atm)

Zero-point correction= 0.302788 (Hartree/Particle)

Sum of electronic and zero-point Energies= -862.456704

Sum of electronic and thermal Energies= -862.440455

Sum of electronic and thermal Enthalpies= -862.439511

Sum of electronic and thermal Free Energies= -862.501859

Electronic Energy SP (RPW6B95D3/def2-QZVPP)= -863.762740649 (Hartree/Particle)

Corrected Free Energy= -863.505107833 (Hartree/Particle)

-----  
CONFORMER 4

CARTESIAN COORDINATES

|   |               |               |               |
|---|---------------|---------------|---------------|
| C | -0.5631577209 | -0.7059816778 | 0.0532874161  |
| C | 0.5578012049  | -0.0194459802 | -0.7151015121 |
| C | -0.3464367828 | 2.0950780271  | 0.1993575360  |
| H | -0.2250185380 | -0.8867609127 | 1.0895114035  |
| H | -0.7656173819 | -1.6879210853 | -0.3849817557 |
| H | -0.2382872053 | 3.1381180232  | 0.4966833573  |
| H | 0.2107909726  | 0.1074452576  | -1.7530900977 |
| C | 1.8448779576  | -0.8546858567 | -0.7477487593 |
| C | 3.2152318409  | 1.1233433471  | -0.1508057205 |
| C | 2.8849241224  | -0.3070985279 | 0.2228529593  |
| H | 2.2796190002  | -0.8477149794 | -1.7555080986 |
| H | 1.6161848111  | -1.8982437860 | -0.5077880465 |
| H | 3.7558886456  | 1.1217862400  | -1.1105076267 |
| H | 3.8963375578  | 1.5603482366  | 0.5884775257  |
| H | 2.4568066923  | -0.3294606265 | 1.2377925324  |
| C | 0.7492798570  | 1.3847829934  | -0.1828634687 |
| N | 2.0053544833  | 1.9122076173  | -0.2171664634 |
| C | -1.8105895324 | 0.1252392532  | 0.0703396058  |
| C | -1.6767160581 | 1.5219146390  | 0.1612104201  |
| C | -3.0845410043 | -0.4540924210 | 0.0600557574  |
| C | -2.8329262655 | 2.3167699806  | 0.2455638838  |
| H | -2.7339069175 | 3.3983721630  | 0.3218111505  |
| C | -4.0865621798 | 1.7272245273  | 0.2257927100  |
| H | -4.9786158105 | 2.3489655346  | 0.2860340750  |
| C | -4.2303231125 | 0.3440904602  | 0.1280782367  |
| H | -5.2214573206 | -0.0985475704 | 0.1142398817  |

|   |               |               |               |
|---|---------------|---------------|---------------|
| H | 2.0889383874  | 2.8722090051  | 0.0835860984  |
| C | 4.1307523734  | -1.1501149196 | 0.2701581838  |
| O | 5.2486774554  | -0.7409785238 | 0.0848428785  |
| O | 3.8639737449  | -2.4250122926 | 0.5499600455  |
| H | 4.7031454304  | -2.9092051259 | 0.5688748700  |
| O | -3.1227221266 | -1.8068946768 | -0.0053903762 |
| C | -4.3707892945 | -2.4476597916 | -0.0332337227 |
| H | -4.9529374736 | -2.2420848893 | 0.8764076807  |
| H | -4.9648500732 | -2.1421263304 | -0.9064171907 |
| H | -4.1733964568 | -3.5209195349 | -0.0946033283 |

Electronic Energy (RPW6B95D3/def2-SVP)= -862.758192087 (Hartree/Particle)

Dipole Moment= 2.1275 (Debye)  
 Number of imaginary frequencies 0

THERMOCHEMICAL DATA (Temperature 298.150 Kelvin. Pressure 1.00000 Atm)

Zero-point correction= 0.302091 (Hartree/Particle)  
 Sum of electronic and zero-point Energies= -862.456101  
 Sum of electronic and thermal Energies= -862.439634  
 Sum of electronic and thermal Enthalpies= -862.438690  
 Sum of electronic and thermal Free Energies= -862.501092

Electronic Energy SP (RPW6B95D3/def2-QZVPP)= -863.761468714 (Hartree/Particle)  
 Corrected Free Energy= -863.504368627 (Hartree/Particle)

-----  
 CONFORMER 5

CARTESIAN COORDINATES

|   |               |               |               |
|---|---------------|---------------|---------------|
| C | -0.6385297493 | -0.7501094023 | 0.5792429151  |
| C | 0.7098479198  | -0.1689095970 | 0.1759245260  |
| C | -0.3453005705 | 2.0699606031  | 0.4792194502  |
| H | -0.6426385385 | -0.8678724176 | 1.6772672464  |
| H | -0.7488058883 | -1.7575629411 | 0.1667029433  |
| H | -0.2686408065 | 3.1484068923  | 0.6161073397  |
| H | 0.8480374662  | -0.3007289403 | -0.9119477038 |
| C | 1.8480874648  | -0.8857527243 | 0.8965584339  |
| C | 3.1442075521  | 1.1068501927  | 0.0201590411  |
| C | 3.2244084449  | -0.3498182166 | 0.5122652004  |
| H | 1.8044702639  | -1.9593000807 | 0.6866421754  |
| H | 1.6956494550  | -0.7570465052 | 1.9747078405  |
| H | 3.0356950262  | 1.1193126079  | -1.0777279196 |
| H | 4.0722097597  | 1.6370978981  | 0.2469555477  |
| H | 3.8781307532  | -0.3767275496 | 1.3946537878  |
| C | 0.7770456953  | 1.3113179130  | 0.4561297680  |
| N | 2.0451481039  | 1.7902266422  | 0.6620616218  |
| C | -1.8060712842 | 0.1066763780  | 0.1902398992  |
| C | -1.6527651932 | 1.5025646997  | 0.2052021561  |
| C | -3.0572934428 | -0.4510023861 | -0.0982699377 |
| C | -2.7625279312 | 2.3195877479  | -0.0666279971 |
| H | -2.6451888935 | 3.4019502230  | -0.0536601703 |
| C | -3.9918176791 | 1.7509134276  | -0.3588893405 |
| H | -4.8474858292 | 2.3891915933  | -0.5738183696 |
| C | -4.1544891394 | 0.3672539877  | -0.3840925288 |
| H | -5.1254727335 | -0.0604757026 | -0.6136810141 |
| H | 2.1323437875  | 2.7959086199  | 0.7129396195  |
| C | 3.9143994643  | -1.2125072977 | -0.5173357850 |
| O | 3.5447720234  | -2.2936803589 | -0.8963512662 |
| O | 5.0255226148  | -0.6313941476 | -0.9731530827 |
| H | 5.4293135634  | -1.2239106131 | -1.6249384884 |
| O | -3.1261541876 | -1.8035271681 | -0.0669017663 |
| C | -4.3471201381 | -2.4268773479 | -0.3669409890 |
| H | -4.6877073986 | -2.1843320341 | -1.3836914453 |
| H | -4.1771416471 | -3.5042107034 | -0.2957427361 |

H -5.1345959882 -2.1408941920 0.3448410340

Electronic Energy (RPW6B95D3/def2-SVP)= -862.759643849 (Hartree/Particle)

Dipole Moment= 3.3368 (Debye)

Number of imaginary frequencies 0

THERMOCHEMICAL DATA (Temperature 298.150 Kelvin. Pressure 1.00000 Atm)

Zero-point correction= 0.302341 (Hartree/Particle)

Sum of electronic and zero-point Energies= -862.457303

Sum of electronic and thermal Energies= -862.440980

Sum of electronic and thermal Enthalpies= -862.440036

Sum of electronic and thermal Free Energies= -862.502439

Electronic Energy SP (RPW6B95D3/def2-QZVPP)= -863.763177333 (Hartree/Particle)

Corrected Free Energy= -863.505972484 (Hartree/Particle)

-----  
CONFORMER 6

CARTESIAN COORDINATES

|   |               |               |               |
|---|---------------|---------------|---------------|
| C | -0.5868082516 | -0.7229219335 | -0.0286396774 |
| C | 0.5586880852  | 0.0242700158  | -0.6980027931 |
| C | -0.3468598354 | 2.0444090578  | 0.4105886452  |
| H | -0.2735521262 | -1.0124478610 | 0.9904828000  |
| H | -0.7888774524 | -1.6524452892 | -0.5694203926 |
| H | -0.2349380828 | 3.0501697478  | 0.8153812014  |
| H | 0.2411570205  | 0.2563694842  | -1.7272781403 |
| C | 1.8396981307  | -0.8169677000 | -0.7813723516 |
| C | 3.2095899089  | 1.0748001746  | 0.0119594824  |
| C | 2.8567178342  | -0.3843537837 | 0.2711343928  |
| H | 2.3094344119  | -0.7116840420 | -1.7665739285 |
| H | 1.5887492533  | -1.8776378449 | -0.6618906033 |
| H | 3.7408859211  | 1.1413271427  | -0.9499772949 |
| H | 3.8940255209  | 1.4478074576  | 0.7836616548  |
| H | 2.4206072915  | -0.4815803677 | 1.2726589776  |
| C | 0.7491873400  | 1.3659851772  | -0.0238613555 |
| N | 2.0102984302  | 1.8815217055  | 0.0197774193  |
| C | -1.8264183332 | 0.1163430476  | 0.0472890903  |
| C | -1.6815407942 | 1.4939043524  | 0.2873808395  |
| C | -3.1052332085 | -0.4439470811 | -0.0503307908 |
| C | -2.8315232386 | 2.2891168095  | 0.4313444225  |
| H | -2.7239055103 | 3.3554723803  | 0.6230502766  |
| C | -4.0899146540 | 1.7194985046  | 0.3239144222  |
| H | -4.9771886424 | 2.3417185169  | 0.4311771269  |
| C | -4.2445058713 | 0.3560923467  | 0.0778848468  |
| H | -5.2392483678 | -0.0710707131 | -0.0027035513 |
| H | 2.0984092654  | 2.7968176786  | 0.4364580769  |
| C | 4.0744256112  | -1.2675247189 | 0.2591928173  |
| O | 4.4108092061  | -1.9951724807 | 1.1571178370  |
| O | 4.7544796466  | -1.1711503881 | -0.8857987610 |
| H | 5.5155138197  | -1.7689494925 | -0.8336403857 |
| O | -3.1546830533 | -1.7817315545 | -0.2586957148 |
| C | -4.4077857257 | -2.4015498633 | -0.3798062658 |
| H | -4.9797563846 | -1.9988941055 | -1.2279864432 |
| H | -4.2190625901 | -3.4645694007 | -0.5500070022 |
| H | -5.0076427342 | -2.2862329476 | 0.5342269708  |

Electronic Energy (RPW6B95D3/def2-SVP)= -862.756451120 (Hartree/Particle)

Dipole Moment= 2.9350 (Debye)

Number of imaginary frequencies 0

THERMOCHEMICAL DATA (Temperature 298.150 Kelvin. Pressure 1.00000 Atm)

Zero-point correction= 0.302272 (Hartree/Particle)  
Sum of electronic and zero-point Energies= -862.454179  
Sum of electronic and thermal Energies= -862.437680  
Sum of electronic and thermal Enthalpies= -862.436736  
Sum of electronic and thermal Free Energies= -862.499272

Electronic Energy SP (RPW6B95D3/def2-QZVPP)= -863.760580254 (Hartree/Particle)  
Corrected Free Energy= -863.503401134 (Hartree/Particle)

-----  
CONFORMER 7

CARTESIAN COORDINATES

|   |               |               |               |
|---|---------------|---------------|---------------|
| C | -0.5967522263 | -0.7461894383 | 0.5618057776  |
| C | 0.7594250401  | -0.1525420714 | 0.2054628881  |
| C | -0.2985750706 | 2.0760733888  | 0.5716576717  |
| H | -0.6232962080 | -0.9063546557 | 1.6541765516  |
| H | -0.7011626750 | -1.7365607142 | 0.1082241497  |
| H | -0.2223458172 | 3.1484401326  | 0.7500556835  |
| H | 0.9279061502  | -0.2510395583 | -0.8800555803 |
| C | 1.8809560229  | -0.8909940589 | 0.9300152968  |
| C | 3.1923677761  | 1.1152302137  | 0.1350795201  |
| C | 3.2819473468  | -0.3534737026 | 0.5908698562  |
| H | 1.8153931142  | -1.9645985982 | 0.7178134324  |
| H | 1.7179320547  | -0.7753961302 | 2.0084812761  |
| H | 3.0840463316  | 1.1469554031  | -0.9615299766 |
| H | 4.1169363358  | 1.6432835364  | 0.3833533197  |
| H | 3.9198309321  | -0.4225469642 | 1.4757082145  |
| C | 0.8223498872  | 1.3159798965  | 0.5400349089  |
| N | 2.0882027654  | 1.7807598191  | 0.7873114912  |
| C | -1.7555618980 | 0.1272518586  | 0.1833577530  |
| C | -1.6016610741 | 1.5214297410  | 0.2535650951  |
| C | -3.0016746768 | -0.4174765873 | -0.1485876238 |
| C | -2.7059131852 | 2.3494406723  | -0.0070638130 |
| H | -2.5881991393 | 3.4303932550  | 0.0487635910  |
| C | -3.9301919119 | 1.7937165408  | -0.3423845213 |
| H | -4.7815043854 | 2.4407748932  | -0.5481475479 |
| C | -4.0931306497 | 0.4122736602  | -0.4228452268 |
| H | -5.0600571368 | -0.0054867478 | -0.6856125914 |
| H | 2.1804239290  | 2.7827418295  | 0.8816679953  |
| C | 3.9604466965  | -1.1829363358 | -0.4675839172 |
| O | 5.0407991814  | -1.7029053473 | -0.3606498706 |
| O | 3.2187313311  | -1.2870726979 | -1.5751409458 |
| H | 3.7051224634  | -1.8303382151 | -2.2133862867 |
| O | -3.0719486794 | -1.7701267087 | -0.1697833199 |
| C | -4.2878981069 | -2.3798478365 | -0.5148790367 |
| H | -4.6105466795 | -2.0978613367 | -1.5272898692 |
| H | -4.1199607448 | -3.4593581303 | -0.4823038104 |
| H | -5.0874988734 | -2.1204481392 | 0.1935487431  |

Electronic Energy (RPW6B95D3/def2-SVP)= -862.757904409 (Hartree/Particle)  
Dipole Moment= 1.3539 (Debye)  
Number of imaginary frequencies 0

THERMOCHEMICAL DATA (Temperature 298.150 Kelvin. Pressure 1.00000 Atm)

Zero-point correction= 0.302717 (Hartree/Particle)  
Sum of electronic and zero-point Energies= -862.455187  
Sum of electronic and thermal Energies= -862.438908  
Sum of electronic and thermal Enthalpies= -862.437964  
Sum of electronic and thermal Free Energies= -862.499825

Electronic Energy SP (RPW6B95D3/def2-QZVPP)= -863.762103170 (Hartree/Particle)

Corrected Free Energy=

-863.504023761 (Hartree/Particle)

-----  
CONFORMER 8

CARTESIAN COORDINATES

|   |               |               |               |
|---|---------------|---------------|---------------|
| C | -0.7761036003 | -0.5382105767 | -1.1568604022 |
| C | 0.6587058327  | -0.0734873449 | -0.9268451034 |
| C | -0.2896433442 | 2.1008122923  | -0.1443624277 |
| H | -0.8414484130 | -1.6227696237 | -1.0178775106 |
| H | -1.0335254151 | -0.3595376163 | -2.2127075997 |
| H | -0.1527567527 | 3.1361287881  | 0.1672789715  |
| H | 1.2012787666  | -0.2281159777 | -1.8685467833 |
| C | 1.4224795603  | -0.8528449438 | 0.1533573447  |
| C | 3.1213647522  | 0.8756288672  | -0.5968065517 |
| C | 2.7806494923  | -0.2024997650 | 0.4527022369  |
| H | 1.5760288748  | -1.8841342258 | -0.1826795225 |
| H | 0.8157106120  | -0.8960080478 | 1.0660102303  |
| H | 3.2891164059  | 0.3954581579  | -1.5711665811 |
| H | 4.0492284198  | 1.3867236373  | -0.3301900038 |
| H | 2.7487496422  | 0.3176081193  | 1.4198182762  |
| C | 0.7690829822  | 1.3861982960  | -0.5933788058 |
| N | 2.0567235028  | 1.8519765195  | -0.6837512126 |
| C | -1.8035507641 | 0.1554205515  | -0.3100689205 |
| C | -1.5762370445 | 1.4771562771  | 0.1066223836  |
| C | -3.0233410770 | -0.4642171177 | -0.0131581837 |
| C | -2.5841382792 | 2.1580795157  | 0.8098350761  |
| H | -2.4082516904 | 3.1823259204  | 1.1346264180  |
| C | -3.7835445214 | 1.5277484197  | 1.0990616604  |
| H | -4.5582678502 | 2.0610071092  | 1.6478729783  |
| C | -4.0172678020 | 0.2137541104  | 0.6992285815  |
| H | -4.9634867793 | -0.2644485279 | 0.9322664782  |
| H | 2.2383379386  | 2.7336328255  | -0.2246815878 |
| C | 3.8987237201  | -1.2086263679 | 0.5697422263  |
| O | 3.8019228785  | -2.3981066299 | 0.4107307301  |
| O | 5.0562531452  | -0.6167134962 | 0.8721643802  |
| H | 5.7383546027  | -1.3028554634 | 0.9237612589  |
| O | -3.1684905292 | -1.7313550261 | -0.4701172357 |
| C | -4.3566963420 | -2.4224027707 | -0.1874511965 |
| H | -4.5182176981 | -2.5259291801 | 0.8950390107  |
| H | -5.2314610160 | -1.9219287394 | -0.6266171752 |
| H | -4.2561629753 | -3.4168630004 | -0.6296908748 |

Electronic Energy (RPW6B95D3/def2-SVP)=

-862.756341482 (Hartree/Particle)

Dipole Moment= 3.1084 (Debye)

Number of imaginary frequencies 0

THERMOCHEMICAL DATA (Temperature 298.150 Kelvin. Pressure 1.00000 Atm)

Zero-point correction= 0.302479 (Hartree/Particle)

Sum of electronic and zero-point Energies= -862.453862

Sum of electronic and thermal Energies= -862.437531

Sum of electronic and thermal Enthalpies= -862.436587

Sum of electronic and thermal Free Energies= -862.498862

Electronic Energy SP (RPW6B95D3/def2-QZVPP)= -863.760172134 (Hartree/Particle)

Corrected Free Energy= -863.502692652 (Hartree/Particle)

-----  
CONFORMER 9

CARTESIAN COORDINATES

|   |               |               |               |
|---|---------------|---------------|---------------|
| C | -0.7431812108 | -0.4294275558 | -1.2182307853 |
| C | 0.6863314027  | 0.0216685737  | -0.9345450112 |

|   |               |               |               |
|---|---------------|---------------|---------------|
| C | -0.2805049256 | 2.1139103426  | 0.0261473247  |
| H | -0.8038485496 | -1.5223051884 | -1.1747660960 |
| H | -0.9916172293 | -0.1611154890 | -2.2570689873 |
| H | -0.1532218572 | 3.1200271700  | 0.4250828289  |
| H | 1.2399596771  | -0.0463382254 | -1.8797429424 |
| C | 1.4441312573  | -0.8498139899 | 0.0787246883  |
| C | 3.1353746048  | 0.9454160909  | -0.4818888072 |
| C | 2.7771751808  | -0.1871712853 | 0.5000829517  |
| H | 1.6292756392  | -1.8295628336 | -0.3764343928 |
| H | 0.8188974436  | -1.0135236748 | 0.9644541555  |
| H | 3.3179067426  | 0.5152754997  | -1.4754711755 |
| H | 4.0585645676  | 1.4467827941  | -0.1770572396 |
| H | 2.6746783776  | 0.2594639670  | 1.4937991540  |
| C | 0.7851925545  | 1.4471993623  | -0.4755094038 |
| N | 2.0711616576  | 1.9264881760  | -0.5238528288 |
| C | -1.7818398078 | 0.1828920761  | -0.3234066923 |
| C | -1.5656173687 | 1.4635774183  | 0.2104667917  |
| C | -3.0010186560 | -0.4659728369 | -0.0940940139 |
| C | -2.5828511502 | 2.0750086049  | 0.9620599659  |
| H | -2.4151675962 | 3.0672701668  | 1.3776971801  |
| C | -3.7813555569 | 1.4160294159  | 1.1835616174  |
| H | -4.5635283728 | 1.8949758898  | 1.7705248082  |
| C | -4.0045736793 | 0.1418062370  | 0.6665442063  |
| H | -4.9502066257 | -0.3595579516 | 0.8475316065  |
| H | 2.2421588915  | 2.7697683795  | 0.0062875873  |
| C | 3.9032030986  | -1.1779056330 | 0.6075720577  |
| O | 4.5381172282  | -1.4095187333 | 1.6041444205  |
| O | 4.1492530195  | -1.7812853637 | -0.5593409236 |
| H | 4.8870636763  | -2.3957120226 | -0.4291050030 |
| O | -3.1356632611 | -1.6879433468 | -0.6631591537 |
| C | -4.3240402768 | -2.4052696326 | -0.4564497500 |
| H | -4.2142524283 | -3.3562152516 | -0.9839516474 |
| H | -4.4971176340 | -2.6050080175 | 0.6106291972  |
| H | -5.1959131406 | -1.8707810885 | -0.8597625427 |

Electronic Energy (RPW6B95D3/def2-SVP)= -862.754346180 (Hartree/Particle)

Dipole Moment= 2.1996 (Debye)

Number of imaginary frequencies 0

THERMOCHEMICAL DATA (Temperature 298.150 Kelvin. Pressure 1.00000 Atm)

Zero-point correction= 0.302639 (Hartree/Particle)

Sum of electronic and zero-point Energies= -862.451708

Sum of electronic and thermal Energies= -862.435356

Sum of electronic and thermal Enthalpies= -862.434412

Sum of electronic and thermal Free Energies= -862.496795

Electronic Energy SP (RPW6B95D3/def2-QZVPP)= -863.759268321 (Hartree/Particle)

Corrected Free Energy= -863.501717141 (Hartree/Particle)

-----  
CONFORMER 10

CARTESIAN COORDINATES

|   |               |               |               |
|---|---------------|---------------|---------------|
| C | -0.6283037259 | -0.8206611728 | 0.7133028133  |
| C | 0.7606865237  | -0.4054960313 | 0.2452584515  |
| C | -0.1193765388 | 1.9196926653  | 0.2478664005  |
| H | -0.6444120859 | -0.7720657266 | 1.8158961340  |
| H | -0.8138662046 | -1.8665639215 | 0.4509617277  |
| H | 0.0386588359  | 2.9983146644  | 0.2422708158  |
| H | 0.8608224632  | -0.6462510137 | -0.8283578598 |
| C | 1.8354232550  | -1.1805850731 | 1.0050825828  |
| C | 3.2499788478  | 0.8477515732  | 1.1423558846  |
| C | 3.2446037342  | -0.6284654398 | 0.7750252818  |
| H | 1.7901099245  | -2.2411429242 | 0.7322675462  |



|   |               |               |               |
|---|---------------|---------------|---------------|
| H | 1.6254746311  | -1.1169134586 | 2.0816657702  |
| H | 4.2269997881  | 1.3029079740  | 0.9480945555  |
| H | 3.0449823575  | 0.9477854397  | 2.2192061782  |
| H | 3.9429591627  | -1.1667304933 | 1.4232089966  |
| C | 0.9387529085  | 1.0899974604  | 0.3434144703  |
| N | 2.2564477572  | 1.5479713000  | 0.3330644260  |
| C | -1.7228717812 | 0.0552103449  | 0.1848699414  |
| C | -1.4671742790 | 1.4231408284  | 0.0138232922  |
| C | -3.0096157080 | -0.4425253842 | -0.0566104424 |
| C | -2.5006689072 | 2.2800691383  | -0.3915581656 |
| H | -2.2981836533 | 3.3417272268  | -0.5208522697 |
| C | -3.7662665754 | 1.7701957471  | -0.6350692182 |
| H | -4.5674413158 | 2.4340341195  | -0.9552450394 |
| C | -4.0327343830 | 0.4120786428  | -0.4766021695 |
| H | -5.0307670283 | 0.0310958825  | -0.6703394700 |
| H | 2.3307594733  | 2.5570084891  | 0.3904672232  |
| C | 3.7065506864  | -0.9135018144 | -0.6460003348 |
| O | 4.2500553767  | -1.9430625448 | -0.9541921536 |
| O | 3.4470012972  | 0.0209460126  | -1.5552928864 |
| H | 2.9877549576  | 0.7801020998  | -1.1191378113 |
| O | -3.1833728491 | -1.7672579647 | 0.1532116712  |
| C | -4.4443369045 | -2.3336324762 | -0.0939065911 |
| H | -4.3584810953 | -3.4007658770 | 0.1253140651  |
| H | -5.2184235629 | -1.8959963890 | 0.5521644618  |
| H | -4.7469127163 | -2.2059423919 | -1.1428923944 |

Electronic Energy (RPW6B95D3/def2-SVP)= -862.766260911 (Hartree/Particle)

Dipole Moment= 6.0110 (Debye)

Number of imaginary frequencies 0

THERMOCHEMICAL DATA (Temperature 298.150 Kelvin. Pressure 1.00000 Atm)

Zero-point correction= 0.303709 (Hartree/Particle)

Sum of electronic and zero-point Energies= -862.462552

Sum of electronic and thermal Energies= -862.446901

Sum of electronic and thermal Enthalpies= -862.445957

Sum of electronic and thermal Free Energies= -862.505628

Electronic Energy SP (RPW6B95D3/def2-QZVPP)= -863.769490902 (Hartree/Particle)

Corrected Free Energy= -863.508857991 (Hartree/Particle)

-----  
CONFORMER 11

CARTESIAN COORDINATES

|   |               |               |               |
|---|---------------|---------------|---------------|
| C | -0.5813993109 | -0.7591329520 | 0.8259794169  |
| C | 0.7971304018  | -0.3440750641 | 0.3336105199  |
| C | -0.1325227923 | 1.9489577780  | 0.1881161732  |
| H | -0.6112417751 | -0.6143587132 | 1.9202248012  |
| H | -0.7344900836 | -1.8287246281 | 0.6517304594  |
| H | -0.0072166442 | 3.0303256375  | 0.1300068133  |
| C | 0.8856306403  | -0.6271197769 | -0.7310075771 |
| C | 1.8985450863  | -1.0638448687 | 1.1002658239  |
| C | 3.3257987327  | 0.9541571384  | 1.0771697225  |
| C | 3.2789060457  | -0.5235838333 | 0.7414000279  |
| H | 1.8137321439  | -2.1488511238 | 0.9460523037  |
| H | 1.7495429923  | -0.9174393448 | 2.1784022380  |
| H | 4.2641912189  | 1.3853520781  | 0.7179231166  |
| H | 3.2994043098  | 1.0656674186  | 2.1737803957  |
| H | 4.0376900318  | -1.0423434392 | 1.3453494555  |
| C | 0.9563625761  | 1.1583522940  | 0.3724893626  |
| N | 2.2309257581  | 1.6478716251  | 0.4368101307  |
| C | -1.6841466060 | 0.0393094315  | 0.2017161944  |
| C | -1.4499020101 | 1.3979438241  | -0.0660116473 |
| C | -2.9480085972 | -0.5111266852 | -0.0407985330 |

|   |               |               |               |
|---|---------------|---------------|---------------|
| C | -2.4965821677 | 2.1895667253  | -0.5677558995 |
| H | -2.3193014840 | 3.2441376016  | -0.7721135103 |
| C | -3.7399638050 | 1.6276250774  | -0.8086808368 |
| H | -4.5462588341 | 2.2442622155  | -1.2028867936 |
| C | -3.9802308763 | 0.2781348618  | -0.5564970780 |
| H | -4.9612188590 | -0.1437179110 | -0.7519298735 |
| H | 2.3076746566  | 2.6553342391  | 0.4299745118  |
| C | 3.6883596299  | -0.7540261905 | -0.7066187794 |
| O | 4.3334678041  | 0.0257577328  | -1.3523151643 |
| O | 3.3273855782  | -1.9220603551 | -1.2475799831 |
| H | 2.8347581058  | -2.4607971929 | -0.6166049181 |
| O | -3.0944743026 | -1.8222508988 | 0.2655546916  |
| C | -4.3324880320 | -2.4388541873 | 0.0268311418  |
| H | -5.1370183761 | -1.9747426862 | 0.6148996057  |
| H | -4.6071021629 | -2.3991455618 | -1.0369154436 |
| H | -4.2279197590 | -3.4839467083 | 0.3291248983  |

Electronic Energy (RPW6B95D3/def2-SVP)= -862.759083799 (Hartree/Particle)

Dipole Moment= 5.3720 (Debye)

Number of imaginary frequencies 0

THERMOCHEMICAL DATA (Temperature 298.150 Kelvin. Pressure 1.00000 Atm)

Zero-point correction= 0.302490 (Hartree/Particle)

Sum of electronic and zero-point Energies= -862.456594

Sum of electronic and thermal Energies= -862.440417

Sum of electronic and thermal Enthalpies= -862.439473

Sum of electronic and thermal Free Energies= -862.500952

Electronic Energy SP (RPW6B95D3/def2-QZVPP)= -863.762557077 (Hartree/Particle)

Corrected Free Energy= -863.504425278 (Hartree/Particle)

-----  
CONFORMER 12

CARTESIAN COORDINATES

|   |               |               |               |
|---|---------------|---------------|---------------|
| C | -0.5619678041 | -0.7029931652 | 0.6964989874  |
| C | 0.7829073535  | -0.1296014078 | 0.2743413072  |
| C | -0.3094996437 | 2.1044829612  | 0.3919846681  |
| H | -0.5953000796 | -0.7262206751 | 1.7999567021  |
| H | -0.6448315785 | -1.7430053267 | 0.3664355381  |
| H | -0.2574572798 | 3.1900660761  | 0.4711656073  |
| H | 0.9360542063  | -0.3255808712 | -0.8014127098 |
| C | 1.9307756940  | -0.7635104837 | 1.0482666979  |
| C | 3.2371058432  | 1.2282368623  | 0.1898645622  |
| C | 3.2922424200  | -0.2675980715 | 0.5315412241  |
| H | 1.8731017860  | -1.8574748918 | 0.9921320617  |
| H | 1.8333110811  | -0.4931576027 | 2.1065004510  |
| H | 3.2600526918  | 1.3309024634  | -0.9052592255 |
| H | 4.1223300217  | 1.7354645094  | 0.5837098766  |
| H | 4.0419802977  | -0.4490832740 | 1.3117729078  |
| C | 0.8232022863  | 1.3650557818  | 0.4737290174  |
| N | 2.0658413480  | 1.8677121137  | 0.7549690156  |
| C | -1.7273672895 | 0.0988081439  | 0.1980777592  |
| C | -1.5944336455 | 1.4940198636  | 0.1034907504  |
| C | -2.9575928411 | -0.5029710030 | -0.0914700079 |
| C | -2.7038239579 | 2.2657836642  | -0.2793019239 |
| H | -2.6031075110 | 3.3474970649  | -0.3509866997 |
| C | -3.9117559260 | 1.6530220431  | -0.5717052282 |
| H | -4.7669178305 | 2.2560892301  | -0.8729477233 |
| C | -4.0535952447 | 0.2694101582  | -0.4878154444 |
| H | -5.0079537129 | -0.1931735989 | -0.7195852721 |
| H | 2.1240839847  | 2.8755005249  | 0.8084211842  |
| C | 3.6757246379  | -1.0960043891 | -0.6801013370 |
| O | 3.5195031900  | -0.7578403392 | -1.8230291401 |

|   |               |               |               |
|---|---------------|---------------|---------------|
| O | 4.1621562422  | -2.3115176771 | -0.4118002640 |
| H | 4.2632990693  | -2.4443733341 | 0.5389372415  |
| O | -3.0085254760 | -1.8491389156 | 0.0502649515  |
| C | -4.2087132772 | -2.5156757878 | -0.2409224291 |
| H | -4.5126440848 | -2.3661594071 | -1.2867859747 |
| H | -4.0276650650 | -3.5801037039 | -0.0712374940 |
| H | -5.0268436785 | -2.1826615667 | 0.4135290722  |

Electronic Energy (RPW6B95D3/def2-SVP)= -862.754653256 (Hartree/Particle)

Dipole Moment= 5.0728 (Debye)

Number of imaginary frequencies 0

THERMOCHEMICAL DATA (Temperature 298.150 Kelvin. Pressure 1.00000 Atm)

Zero-point correction= 0.302640 (Hartree/Particle)

Sum of electronic and zero-point Energies= -862.452013

Sum of electronic and thermal Energies= -862.435734

Sum of electronic and thermal Enthalpies= -862.434789

Sum of electronic and thermal Free Energies= -862.496984

Electronic Energy SP (RPW6B95D3/def2-QZVPP)= -863.759346069 (Hartree/Particle)

Corrected Free Energy= -863.501676813 (Hartree/Particle)

-----

CONFORMERS of IMINE CIS-2

CONFORMER 1

CARTESIAN COORDINATES

|   |               |               |               |
|---|---------------|---------------|---------------|
| C | -0.4466039886 | 0.6929335868  | 0.4338342835  |
| C | 0.6160410448  | -0.2498594752 | 1.0020642593  |
| C | -0.6645914991 | -2.2681117428 | 0.2280143673  |
| H | -0.0715846501 | 1.1642262074  | -0.4883843842 |
| H | -0.6141189172 | 1.5205550442  | 1.1338021333  |
| H | -0.6495352334 | -3.0537022525 | -0.5349173899 |
| H | -0.7326006769 | -2.7765385503 | 1.2033907251  |
| H | 0.2778173134  | -0.5447405749 | 2.0062590852  |
| C | 1.9929290140  | 0.3893982450  | 1.1036402056  |
| C | 2.8276596139  | -1.2181701951 | -0.6070490353 |
| C | 2.7185134398  | 0.2595391638  | -0.2206042961 |
| H | 2.5872593633  | -0.1105401841 | 1.8787749841  |
| H | 1.9101967631  | 1.4407055110  | 1.4025201038  |
| H | 3.5647574158  | -1.7211144431 | 0.0392551098  |
| H | 3.2181520674  | -1.3061202346 | -1.6280200149 |
| H | 2.1442394918  | 0.7611446944  | -1.0149570285 |
| C | 0.6285990264  | -1.5128945709 | 0.1788578143  |
| N | 1.5871072869  | -1.9520112237 | -0.5289582150 |
| C | -1.7545795331 | 0.0108380426  | 0.1480702929  |
| C | -1.8709142704 | -1.3767528768 | 0.0542130943  |
| C | -2.9018313306 | 0.8062183022  | -0.0436864886 |
| C | -3.1172189917 | -1.9574345633 | -0.2112822697 |
| H | -3.1961495239 | -3.0407437656 | -0.2850818942 |
| C | -4.2368377450 | -1.1623890375 | -0.3845404919 |
| H | -5.2034250447 | -1.6181168001 | -0.5914142542 |
| C | -4.1403055663 | 0.2259693081  | -0.3037039776 |
| H | -5.0242399579 | 0.8397459438  | -0.4477392035 |
| C | 4.0688032676  | 0.9199319745  | -0.1981845856 |
| O | 4.5561375078  | 1.4768440615  | 0.7524294323  |
| O | 4.6955766875  | 0.8153075792  | -1.3719579321 |
| H | 5.5594797953  | 1.2460174127  | -1.2884366808 |
| O | -2.7007121942 | 2.1393982092  | 0.0415646006  |
| C | -3.7971823356 | 3.0029490680  | -0.1190658863 |
| H | -3.4158219547 | 4.0203563720  | -0.0033504687 |

H -4.2495484452 2.8994379659 -1.1152770744  
H -4.5698165483 2.8195209250 0.6407264861

Electronic Energy (RPW6B95D3/def2-SVP)= -862.756363358 (Hartree/Particle)

Dipole Moment= 2.9024 (Debye)

Number of imaginary frequencies 0

THERMOCHEMICAL DATA (Temperature 298.150 Kelvin. Pressure 1.00000 Atm)

Zero-point correction= 0.301807 (Hartree/Particle)

Sum of electronic and zero-point Energies= -862.454557

Sum of electronic and thermal Energies= -862.438337

Sum of electronic and thermal Enthalpies= -862.437393

Sum of electronic and thermal Free Energies= -862.499159

Electronic Energy SP (RPW6B95D3/def2-QZVPP)= -863.762742110 (Hartree/Particle)

Corrected Free Energy= -863.505537752 (Hartree/Particle)

-----  
CONFORMER 2

CARTESIAN COORDINATES

C -0.5685640241 0.6825609182 -1.1002232776  
C 0.7643711845 0.2039769416 -0.5268705331  
C -0.4485194358 -2.0601879653 -0.4267588485  
H -0.6328492375 0.4013298034 -2.1635053582  
H -0.6204953547 1.77452226166 -1.0619766952  
H -0.6926205876 -2.4428286727 -1.4315596123  
H -0.2823720147 -2.9477795984 0.1928328802  
H 0.7625453400 0.4804101592 0.5392094295  
C 1.9787454956 0.8438856058 -1.1776144156  
C 3.1828514776 -1.3335055236 -0.9764285188  
C 3.2456673949 0.1682296292 -0.6813576557  
H 1.9997996001 1.9169580575 -0.9598292428  
H 1.9188072299 0.7277083242 -2.2679634428  
H 3.9474301229 -1.8617640547 -0.3945249691  
H 3.4511908677 -1.4974753354 -2.0301552515  
H 4.1243842941 0.5685185984 -1.2077438877  
C 0.8536646600 -1.3027047288 -0.5713719301  
N 1.9121560671 -1.9791676818 -0.7548688699  
C -1.7027287480 0.0848307829 -0.3233516474  
C -1.6139020986 -1.2525988450 0.0655903191  
C -2.8174315326 0.8453185686 0.0672005805  
C -2.6211939022 -1.8266844612 0.8452296685  
H -2.5417740781 -2.8693309656 1.1479362307  
C -3.7169898730 -1.0660885849 1.2249791274  
H -4.5042595340 -1.5093702342 1.8321222304  
C -3.8258289862 0.2681358589 0.8400674933  
H -4.6906314678 0.8482504222 1.1475878564  
C 3.5046647077 0.4861015193 0.7738803194  
O 2.9162416932 1.3171463764 1.4196691578  
O 4.5049232365 -0.2343624640 1.2823635686  
H 4.6310554355 0.0420221317 2.2025203561  
O -2.8372496843 2.1312255147 -0.3477393041  
C -3.9098042752 2.9521237292 0.0372913194  
H -3.7181089277 3.9403045398 -0.3879014879  
H -4.8669479829 2.5746379547 -0.3492640369  
H -3.9803768330 3.0384662479 1.1308049229

Electronic Energy (RPW6B95D3/def2-SVP)= -862.755966034 (Hartree/Particle)

Dipole Moment= 1.8282 (Debye)

Number of imaginary frequencies 0

THERMOCHEMICAL DATA (Temperature 298.150 Kelvin. Pressure 1.00000 Atm)

Zero-point correction= 0.301791 (Hartree/Particle)  
Sum of electronic and zero-point Energies= -862.454175  
Sum of electronic and thermal Energies= -862.438012  
Sum of electronic and thermal Enthalpies= -862.437068  
Sum of electronic and thermal Free Energies= -862.498930  
  
Electronic Energy SP (RPW6B95D3/def2-QZVPP)= -863.761034397 (Hartree/Particle)  
Corrected Free Energy= -863.503998363 (Hartree/Particle)

-----  
CONFORMER 3

CARTESIAN COORDINATES

|   |               |               |               |
|---|---------------|---------------|---------------|
| C | -0.4391886127 | 0.6858063113  | 0.4093600121  |
| C | 0.6200127889  | -0.2629783256 | 0.9735287435  |
| C | -0.6786289183 | -2.2749480244 | 0.2136801013  |
| H | -0.0669818084 | 1.1503211681  | -0.5172466641 |
| H | -0.5955395073 | 1.5170754359  | 1.1075381318  |
| H | -0.6734190082 | -3.0614298649 | -0.5484860087 |
| H | -0.7439585241 | -2.7820247804 | 1.1899164762  |
| H | 0.2881750804  | -0.5523998619 | 1.9814792772  |
| C | 2.0031071773  | 0.3633754623  | 1.0680907689  |
| C | 2.8164162872  | -1.2488435605 | -0.6377168019 |
| C | 2.7180173160  | 0.2353363856  | -0.2734510515 |
| H | 2.5991362221  | -0.1507558170 | 1.8317176644  |
| H | 1.9231385630  | 1.4136340802  | 1.3744463873  |
| H | 3.5521013429  | -1.7382179107 | 0.0184234114  |
| H | 3.2051253254  | -1.3572993799 | -1.6587683582 |
| H | 2.1455749061  | 0.7535399006  | -1.0518241418 |
| C | 0.6190068585  | -1.5286805072 | 0.1554725186  |
| N | 1.5721190582  | -1.9756972041 | -0.5542940279 |
| C | -1.7538597580 | 0.0113969836  | 0.1357029930  |
| C | -1.8799767925 | -1.3756718263 | 0.0464845969  |
| C | -2.8973251589 | 0.8137324831  | -0.0500296892 |
| C | -3.1318750452 | -1.9490321059 | -0.2081956827 |
| H | -3.2182745918 | -3.0319946775 | -0.2783705456 |
| C | -4.2475039287 | -1.1472473629 | -0.3755306430 |
| H | -5.2185097699 | -1.5972198843 | -0.5740748396 |
| C | -4.1413665131 | 0.2406289749  | -0.2993230432 |
| H | -5.0224347975 | 0.8595524425  | -0.4386146082 |
| C | 4.0748043247  | 0.8802868086  | -0.2690555378 |
| O | 4.4466830925  | 1.7267071352  | -1.0413615616 |
| O | 4.8583826200  | 0.3984608127  | 0.7003053387  |
| H | 5.7155743407  | 0.8462065486  | 0.6408646136  |
| O | -2.6870920536 | 2.1457585704  | 0.0298813130  |
| C | -3.7785030685 | 3.0162900206  | -0.1273971477 |
| H | -3.3891029794 | 4.0314700497  | -0.0191964708 |
| H | -4.2383233956 | 2.9113161895  | -1.1200301811 |
| H | -4.5472197654 | 2.8421651551  | 0.6385287641  |

Electronic Energy (RPW6B95D3/def2-SVP)= -862.754929470 (Hartree/Particle)

Dipole Moment= 3.7474 (Debye)  
Number of imaginary frequencies 0

THERMOCHEMICAL DATA (Temperature 298.150 Kelvin. Pressure 1.00000 Atm)

Zero-point correction= 0.301859 (Hartree/Particle)  
Sum of electronic and zero-point Energies= -862.453070  
Sum of electronic and thermal Energies= -862.436793  
Sum of electronic and thermal Enthalpies= -862.435849  
Sum of electronic and thermal Free Energies= -862.497990

Electronic Energy SP (RPW6B95D3/def2-QZVPP)= -863.761893338 (Hartree/Particle)  
Corrected Free Energy= -863.504953868 (Hartree/Particle)

-----  
CONFORMER 4

CARTESIAN COORDINATES

|   |               |               |               |
|---|---------------|---------------|---------------|
| C | -0.5334845860 | 1.0344717852  | -0.4427693888 |
| C | 0.8226661985  | 0.4656732032  | -0.0254603952 |
| C | -0.2024328675 | -1.8433516077 | 0.1289871017  |
| H | -0.5452941338 | 1.1700088211  | -1.5361269048 |
| H | -0.6507649228 | 2.0407913274  | -0.0240308866 |
| H | -0.2605993925 | -2.7619165175 | -0.4661573200 |
| H | 0.1085215896  | -2.1601950175 | 1.1380260948  |
| H | 0.8660290742  | 0.4770263541  | 1.0741641953  |
| C | 1.9747660780  | 1.2979484558  | -0.5793589469 |
| C | 2.9419080388  | -0.7633694669 | -1.5681922464 |
| C | 3.2375835007  | 0.4675468048  | -0.7099518629 |
| H | 2.1432716894  | 2.1734824910  | 0.0569411473  |
| H | 1.7102646629  | 1.6693864659  | -1.5777658154 |
| H | 3.8187589095  | -1.4208552671 | -1.5954399148 |
| H | 2.7699526686  | -0.4429849971 | -2.6061169540 |
| H | 4.0320767221  | 1.0432613239  | -1.2046839285 |
| C | 0.9014161213  | -0.9867593102 | -0.4211939823 |
| N | 1.8066163762  | -1.5385317515 | -1.1227105293 |
| C | -1.6980648873 | 0.1814689622  | -0.0340422252 |
| C | -1.5499451305 | -1.1789367598 | 0.2310827758  |
| C | -2.9789022744 | 0.7613751129  | 0.0584429179  |
| C | -2.6622673520 | -1.9454028058 | 0.6005283777  |
| H | -2.5352784499 | -3.0069553532 | 0.8063907819  |
| C | -3.9119540466 | -1.3595453924 | 0.6991182108  |
| H | -4.7748360596 | -1.9577830568 | 0.9860849235  |
| C | -4.0827565334 | -0.0022343417 | 0.4290290286  |
| H | -5.0695753085 | 0.4440364563  | 0.5053513018  |
| C | 3.7928186669  | 0.0823924167  | 0.6412341765  |
| O | 3.3545915644  | 0.4447766830  | 1.7043451298  |
| O | 4.8616398754  | -0.7091119114 | 0.5410788744  |
| H | 5.1679286450  | -0.9095525593 | 1.4382272526  |
| O | -3.0433907635 | 2.0782217822  | -0.2375480644 |
| C | -4.2817144365 | 2.7349537968  | -0.1467181087 |
| H | -5.0177553134 | 2.3063723164  | -0.8413363990 |
| H | -4.6896302889 | 2.6885116063  | 0.8728155610  |
| H | -4.1041642589 | 3.7795323990  | -0.4138646812 |

Electronic Energy (RPW6B95D3/def2-SVP)= -862.756520786 (Hartree/Particle)

Dipole Moment= 2.2983 (Debye)  
Number of imaginary frequencies 0

THERMOCHEMICAL DATA (Temperature 298.150 Kelvin. Pressure 1.00000 Atm)

Zero-point correction= 0.301730 (Hartree/Particle)  
Sum of electronic and zero-point Energies= -862.454791  
Sum of electronic and thermal Energies= -862.438594  
Sum of electronic and thermal Enthalpies= -862.437650  
Sum of electronic and thermal Free Energies= -862.499582

Electronic Energy SP (RPW6B95D3/def2-QZVPP)= -863.761804729 (Hartree/Particle)  
Corrected Free Energy= -863.504865943 (Hartree/Particle)

-----  
CONFORMER 5

CARTESIAN COORDINATES

|   |               |              |               |
|---|---------------|--------------|---------------|
| C | -0.5033424837 | 0.5110660895 | -1.2000156737 |
|---|---------------|--------------|---------------|

|   |               |               |               |
|---|---------------|---------------|---------------|
| C | 0.8143034888  | 0.0789153285  | -0.5584100530 |
| H | -0.4616088988 | -2.1263843146 | -0.2073849835 |
| H | -0.5685718353 | 0.0910223145  | -2.2162633984 |
| H | -0.5277988106 | 1.5992099094  | -1.3077832011 |
| H | -0.7058493204 | -2.5949864050 | -1.1752102454 |
| H | -0.3315626317 | -2.9542874420 | 0.4971851829  |
| H | 0.8112584055  | 0.5000226760  | 0.4616281502  |
| C | 2.0520555409  | 0.5801771832  | -1.2794885864 |
| C | 3.2060770496  | -1.5567433642 | -0.7252099868 |
| C | 3.2844499569  | -0.0386175246 | -0.6307140180 |
| H | 2.0964713434  | 1.6732687203  | -1.2534227538 |
| H | 2.0167326511  | 0.2757525901  | -2.3341125489 |
| H | 3.9228911919  | -2.0040378318 | -0.0262250210 |
| H | 3.5217979148  | -1.8762876933 | -1.7286065991 |
| H | 4.1895248416  | 0.3051567923  | -1.1527410324 |
| C | 0.8652513813  | -1.4254681489 | -0.4036238159 |
| N | 1.9094355946  | -2.1432147228 | -0.4744844530 |
| C | -1.6544520743 | 0.0472674784  | -0.3592021439 |
| C | -1.6045009290 | -1.2367910849 | 0.1855711504  |
| C | -2.7437991105 | 0.8825930022  | -0.0622186231 |
| C | -2.6260374097 | -1.6844394797 | 1.0266209062  |
| H | -2.5771006579 | -2.6857897906 | 1.4507094037  |
| C | -3.6973845007 | -0.8511214300 | 1.3124460176  |
| H | -4.4961996711 | -1.1953499071 | 1.9668890635  |
| C | -3.7669538188 | 0.4310119519  | 0.7726380813  |
| H | -4.6131516991 | 1.0689997135  | 1.0090105669  |
| C | 3.4692949563  | 0.4088230434  | 0.8044097066  |
| O | 3.8642603598  | -0.2885974268 | 1.7035214301  |
| O | 3.1696413848  | 1.6973166559  | 0.9795305248  |
| H | 3.3358839193  | 1.9163409416  | 1.9088328133  |
| O | -2.7253157771 | 2.1105826155  | -0.6257612764 |
| C | -3.7718787127 | 3.0035555264  | -0.3428160122 |
| H | -4.7409018003 | 2.6113277515  | -0.6820981373 |
| H | -3.8366664270 | 3.2227751113  | 0.7323278374  |
| H | -3.5518855741 | 3.9273399344  | -0.8834217725 |

Electronic Energy (RPW6B95D3/def2-SVP)= -862.755926729 (Hartree/Particle)

Dipole Moment= 5.2292 (Debye)

Number of imaginary frequencies 0

THERMOCHEMICAL DATA (Temperature 298.150 Kelvin. Pressure 1.00000 Atm)

Zero-point correction= 0.301807 (Hartree/Particle)

Sum of electronic and zero-point Energies= -862.454119

Sum of electronic and thermal Energies= -862.437976

Sum of electronic and thermal Enthalpies= -862.437032

Sum of electronic and thermal Free Energies= -862.498989

Electronic Energy SP (RPW6B95D3/def2-QZVPP)= -863.761046404 (Hartree/Particle)

Corrected Free Energy= -863.504108675 (Hartree/Particle)

-----  
CONFORMER 6

CARTESIAN COORDINATES

|   |               |               |               |
|---|---------------|---------------|---------------|
| C | -0.4858867869 | 0.6862838596  | 1.1910867998  |
| C | 0.8662582388  | 0.1752304319  | 0.6599439133  |
| C | -0.3719431644 | -2.0377583227 | 0.7520465036  |
| H | -0.5345264551 | 1.7751119647  | 1.0994502090  |
| H | -0.5479403681 | 0.4663501058  | 2.2668139566  |
| H | -0.3391169133 | -3.0699454962 | 0.3947003589  |
| H | -0.2918182950 | -2.0397418371 | 1.8505126750  |
| H | 1.5674619551  | 0.1649584430  | 1.5063453856  |
| C | 1.4724402934  | 1.0561165790  | -0.4224024807 |
| C | 2.4692535879  | -0.9994860224 | -1.4574565812 |

|   |               |               |               |
|---|---------------|---------------|---------------|
| C | 2.7511598460  | 0.4178067634  | -0.9394878781 |
| H | 1.6771005399  | 2.0551908451  | -0.0235885037 |
| H | 0.7611163761  | 1.1661346511  | -1.2521237831 |
| H | 3.4000272746  | -1.5781084385 | -1.4927960419 |
| H | 2.1296768237  | -0.9319663152 | -2.5008256009 |
| H | 3.1494536510  | 0.9967453121  | -1.7854834792 |
| C | 0.7663607751  | -1.2494941936 | 0.1623207788  |
| N | 1.4748062834  | -1.7706544361 | -0.7524608221 |
| C | -1.6627584011 | 0.0470235198  | 0.5159929594  |
| C | -1.6354310817 | -1.3366868813 | 0.3285946531  |
| C | -2.7886856224 | 0.7755959924  | 0.1029603899  |
| C | -2.7076082784 | -1.9947857762 | -0.2741157761 |
| H | -2.6686943707 | -3.0718218042 | -0.4255368722 |
| C | -3.8159208347 | -1.2627744441 | -0.6773539853 |
| H | -4.6595960454 | -1.7659352733 | -1.1463987308 |
| C | -3.8653615787 | 0.1173320400  | -0.4955671933 |
| H | -4.7415463721 | 0.6701316931  | -0.8207413786 |
| C | 3.8510145771  | 0.4798742513  | 0.0966345886  |
| O | 3.8090894140  | 1.1174596168  | 1.1192737512  |
| O | 4.9249553407  | -0.2267194499 | -0.2579312760 |
| H | 5.5942245676  | -0.1158221929 | 0.4340288744  |
| O | -2.7549936849 | 2.1080008992  | 0.3239180830  |
| C | -3.8434581888 | 2.8926788009  | -0.0913793684 |
| H | -3.6045310811 | 3.9260991777  | 0.1712232152  |
| H | -3.9998887790 | 2.8244826326  | -1.1771950700 |
| H | -4.7717180492 | 2.5982273702  | 0.4181830029  |

Electronic Energy (RPW6B95D3/def2-SVP)= -862.754253800 (Hartree/Particle)

Dipole Moment= 2.3219 (Debye)

Number of imaginary frequencies 0

THERMOCHEMICAL DATA (Temperature 298.150 Kelvin. Pressure 1.00000 Atm)

Zero-point correction= 0.302268 (Hartree/Particle)

Sum of electronic and zero-point Energies= -862.451986

Sum of electronic and thermal Energies= -862.436025

Sum of electronic and thermal Enthalpies= -862.435081

Sum of electronic and thermal Free Energies= -862.496295

Electronic Energy SP (RPW6B95D3/def2-QZVPP)= -863.759471002 (Hartree/Particle)

Corrected Free Energy= -863.501512202 (Hartree/Particle)

-----  
CONFORMER 7

CARTESIAN COORDINATES

|   |               |               |               |
|---|---------------|---------------|---------------|
| C | -0.6752533719 | 0.2315844895  | 1.5698908739  |
| C | 0.6963985376  | -0.2514101634 | 1.0960673561  |
| C | -0.6874896042 | -2.3354224336 | 0.5418940351  |
| H | -0.6531919242 | 1.3065298296  | 1.7692495682  |
| H | -0.9174702257 | -0.2616953077 | 2.5228645494  |
| H | -0.6381040018 | -3.2576821514 | -0.0429763043 |
| H | -0.9031701147 | -2.6089520848 | 1.5881450916  |
| H | 1.3742557471  | -0.3112913348 | 1.9620797457  |
| C | 1.3335058242  | 0.7026086352  | 0.0758984855  |
| C | 2.8339633834  | -1.3364276098 | -0.0696070537 |
| C | 2.5190208016  | 0.0622497734  | -0.6452595309 |
| H | 1.6616762410  | 1.6122140244  | 0.5890544419  |
| H | 0.5662702102  | 0.9966028841  | -0.6503121520 |
| H | 3.2298472210  | -1.2216637650 | 0.9534855620  |
| H | 3.6181037214  | -1.8119656876 | -0.6665041510 |
| H | 2.2833101438  | -0.0974500741 | -1.7052733409 |
| C | 0.6386526634  | -1.6338866081 | 0.5023096650  |
| N | 1.6501319366  | -2.1650318670 | -0.0576650160 |
| C | -1.7363974199 | -0.1015641672 | 0.5625611006  |



|   |               |               |               |
|---|---------------|---------------|---------------|
| C | -1.7542639455 | -1.3979702058 | 0.0437156559  |
| C | -2.6905880042 | 0.8293905936  | 0.1239720037  |
| C | -2.7059222523 | -1.7711491024 | -0.9052958175 |
| H | -2.7046313445 | -2.7822310354 | -1.3079293415 |
| C | -3.6473047890 | -0.8425944815 | -1.3276082119 |
| H | -4.3956788965 | -1.1233818918 | -2.0664882270 |
| C | -3.6473425013 | 0.4552181466  | -0.8221974485 |
| H | -4.3903882356 | 1.1667563427  | -1.1694866495 |
| C | 3.7584454362  | 0.9208443765  | -0.6169612982 |
| O | 3.8976662938  | 1.9466760394  | -0.0012455380 |
| O | 4.7324745473  | 0.3956741268  | -1.3630948715 |
| H | 5.5073214744  | 0.9727633088  | -1.2903954842 |
| O | -2.6158503493 | 2.0644556606  | 0.6655494343  |
| C | -3.5289775177 | 3.0461412197  | 0.2463525058  |
| H | -3.2851480774 | 3.9578790189  | 0.7970144955  |
| H | -3.4437247217 | 3.2433975799  | -0.8315751114 |
| H | -4.5650538569 | 2.7567280891  | 0.4716266059  |

Electronic Energy (RPW6B95D3/def2-SVP)= -862.754323843 (Hartree/Particle)

Dipole Moment= 2.2796 (Debye)  
 Number of imaginary frequencies 0

THERMOCHEMICAL DATA (Temperature 298.150 Kelvin. Pressure 1.00000 Atm)

|                                              |                             |
|----------------------------------------------|-----------------------------|
| Zero-point correction=                       | 0.302165 (Hartree/Particle) |
| Sum of electronic and zero-point Energies=   | -862.452159                 |
| Sum of electronic and thermal Energies=      | -862.436046                 |
| Sum of electronic and thermal Enthalpies=    | -862.435101                 |
| Sum of electronic and thermal Free Energies= | -862.497135                 |

|                                              |                                   |
|----------------------------------------------|-----------------------------------|
| Electronic Energy SP (RPW6B95D3/def2-QZVPP)= | -863.761121828 (Hartree/Particle) |
| Corrected Free Energy=                       | -863.503932985 (Hartree/Particle) |

-----  
 CONFORMER 8

CARTESIAN COORDINATES

|   |               |               |               |
|---|---------------|---------------|---------------|
| C | -0.4486109763 | 0.7880798770  | 1.0897845000  |
| C | 0.8932113938  | 0.1950286195  | 0.6226447486  |
| C | -0.3856972550 | -1.9687895994 | 0.9822555261  |
| H | -0.4774627290 | 1.8601581187  | 0.8752302010  |
| H | -0.5137125971 | 0.6915579832  | 2.1832007758  |
| H | -0.3717409778 | -3.0372823813 | 0.7538461555  |
| H | -0.3107673741 | -1.8386978236 | 2.0733576993  |
| H | 1.5955580643  | 0.2776399020  | 1.4672876479  |
| C | 1.4958385415  | 0.9122132466  | -0.5748888553 |
| C | 2.4977861491  | -1.2664411725 | -1.3073467826 |
| C | 2.7844355881  | 0.1980705615  | -0.9903174200 |
| H | 1.6978995536  | 1.9623844626  | -0.3375801743 |
| H | 0.7870339391  | 0.8932637884  | -1.4139153225 |
| H | 3.4210609352  | -1.8518488403 | -1.2117868798 |
| H | 2.1982440597  | -1.3527334934 | -2.3616030403 |
| H | 3.2015021902  | 0.6943016893  | -1.8757369005 |
| C | 0.7723245051  | -1.2821371037 | 0.3092843640  |
| N | 1.4732604575  | -1.9235411759 | -0.5305644717 |
| C | -1.6347632177 | 0.0956851954  | 0.4874331754  |
| C | -1.6330320175 | -1.3007063158 | 0.4679618941  |
| C | -2.7429203477 | 0.7908171189  | -0.0202134164 |
| C | -2.7142348305 | -2.0061407199 | -0.0601826442 |
| H | -2.6956437639 | -3.0940707909 | -0.0809492870 |
| C | -3.8053289237 | -1.3070634139 | -0.5578431802 |
| H | -4.6559012498 | -1.8469588667 | -0.9701141346 |
| C | -3.8286929859 | 0.0855336552  | -0.5440906519 |
| H | -4.6916598784 | 0.6116117175  | -0.9409588161 |
| C | 3.8108767477  | 0.3350315884  | 0.1074613102  |

|   |               |               |               |
|---|---------------|---------------|---------------|
| O | 4.2082544510  | -0.5621812042 | 0.8072927221  |
| O | 4.2263437573  | 1.5948144367  | 0.2475395955  |
| H | 4.8561469409  | 1.6211464092  | 0.9835708386  |
| O | -2.6836103161 | 2.1391243836  | 0.0383860063  |
| C | -3.7533019612 | 2.8888048574  | -0.4782667395 |
| H | -3.4943208007 | 3.9415466057  | -0.3417541786 |
| H | -3.9050861586 | 2.6915057258  | -1.5488490623 |
| H | -4.6902352098 | 2.6774177533  | 0.0560291361  |

Electronic Energy (RPW6B95D3/def2-SVP)= -862.754084319 (Hartree/Particle)

Dipole Moment= 5.1855 (Debye)

Number of imaginary frequencies 0

THERMOCHEMICAL DATA (Temperature 298.150 Kelvin. Pressure 1.00000 Atm)

Zero-point correction= 0.301927 (Hartree/Particle)

Sum of electronic and zero-point Energies= -862.452157

Sum of electronic and thermal Energies= -862.436004

Sum of electronic and thermal Enthalpies= -862.435060

Sum of electronic and thermal Free Energies= -862.497672

Electronic Energy SP (RPW6B95D3/def2-QZVPP)= -863.759902244 (Hartree/Particle)

Corrected Free Energy= -863.503489925 (Hartree/Particle)

-----  
CONFORMER 9

CARTESIAN COORDINATES

|   |               |               |               |
|---|---------------|---------------|---------------|
| C | -0.6268272062 | 0.8189286913  | -0.8006026600 |
| C | 0.6223045857  | 0.1843001410  | -0.1959010829 |
| C | -0.6216893560 | -1.9581471572 | -0.8723981768 |
| H | -0.5556954255 | 0.7543879268  | -1.8983573067 |
| H | -0.6745880426 | 1.8827231593  | -0.5527679995 |
| H | -0.5869328409 | -1.8392857389 | -1.9690945244 |
| H | -0.6071162176 | -3.0314569323 | -0.6635922924 |
| H | 0.6107682298  | 0.3834871576  | 0.8888792841  |
| C | 1.9290289259  | 0.7585288976  | -0.7553227141 |
| C | 2.7406290108  | -1.2641829481 | 0.5406011472  |
| C | 3.1303565922  | -0.1276429871 | -0.4274187149 |
| H | 2.0896590261  | 1.7622313387  | -0.3484748699 |
| H | 1.8302114572  | 0.8636514905  | -1.8419941758 |
| H | 2.4911130316  | -0.8280120386 | 1.5227829438  |
| H | 3.5975615971  | -1.9274905211 | 0.6929148416  |
| H | 3.4993379360  | -0.6232610629 | -1.3347067773 |
| C | 0.6182071054  | -1.3159592326 | -0.3193892930 |
| N | 1.6148779526  | -2.0199122801 | 0.0402286935  |
| C | -1.8634359281 | 0.1091257347  | -0.3361246307 |
| C | -1.8633717360 | -1.2869017792 | -0.3552644567 |
| C | -2.9991609001 | 0.7919095582  | 0.1266828592  |
| C | -2.9766458065 | -2.0031602810 | 0.0856712705  |
| H | -2.9623812488 | -3.0913368412 | 0.0717678899  |
| C | -4.0944670232 | -1.3167695798 | 0.5388215111  |
| H | -4.9683174400 | -1.8663765473 | 0.8840406744  |
| C | -4.1156844357 | 0.0755972882  | 0.5631461899  |
| H | -4.9997168932 | 0.5931081790  | 0.9233054151  |
| C | 4.2977981269  | 0.6482356962  | 0.1287433427  |
| O | 4.2949202095  | 1.8138592090  | 0.4321907333  |
| O | 5.3748859380  | -0.1266973052 | 0.2713557238  |
| H | 6.0829445852  | 0.4141173059  | 0.6519930334  |
| O | -2.9333351575 | 2.1410470008  | 0.1157151185  |
| C | -4.0310198874 | 2.8786609501  | 0.5889972991  |
| H | -3.7609882983 | 3.9339932400  | 0.5033810047  |
| H | -4.9334093093 | 2.6895786779  | -0.0092914343 |
| H | -4.2498855345 | 2.6477471498  | 1.6410921380  |

Electronic Energy (RPW6B95D3/def2-SVP)= -862.754005890 (Hartree/Particle)  
Dipole Moment= 2.1147 (Debye)  
Number of imaginary frequencies 0

THERMOCHEMICAL DATA (Temperature 298.150 Kelvin. Pressure 1.00000 Atm)

Zero-point correction= 0.301898 (Hartree/Particle)  
Sum of electronic and zero-point Energies= -862.452108  
Sum of electronic and thermal Energies= -862.435913  
Sum of electronic and thermal Enthalpies= -862.434969  
Sum of electronic and thermal Free Energies= -862.496802

Electronic Energy SP (RPW6B95D3/def2-QZVPP)= -863.760957551 (Hartree/Particle)  
Corrected Free Energy= -863.503753661 (Hartree/Particle)

-----  
CONFORMER 10

CARTESIAN COORDINATES

|   |               |               |               |
|---|---------------|---------------|---------------|
| C | -0.4217337881 | 0.7643952989  | 1.1019565678  |
| C | 0.9097703355  | 0.1737466473  | 0.6033199340  |
| C | -0.3752468191 | -1.9900973922 | 0.9403052432  |
| H | -0.4480099538 | 1.8405908584  | 0.9087600557  |
| H | -0.4710729700 | 0.6468282563  | 2.1941348712  |
| H | -0.3704242615 | -3.0540322736 | 0.6911856611  |
| H | -0.2834076690 | -1.8814803306 | 2.0324607665  |
| H | 1.6250835764  | 0.2364542560  | 1.4387509737  |
| C | 1.4982870175  | 0.9109171646  | -0.5890742334 |
| C | 2.4773738760  | -1.2581744582 | -1.3785131800 |
| C | 2.7766772460  | 0.1983603973  | -1.0374356773 |
| H | 1.7095088572  | 1.9552468517  | -0.3346121998 |
| H | 0.7769570026  | 0.9117993815  | -1.4175726169 |
| H | 3.3988031832  | -1.8500444993 | -1.3083703198 |
| H | 2.1614907301  | -1.3223116460 | -2.4295747931 |
| H | 3.1833006447  | 0.7095641846  | -1.9192000907 |
| C | 0.7762687207  | -1.2964402208 | 0.2633525984  |
| N | 1.4611058906  | -1.9250078132 | -0.5991795471 |
| C | -1.6203971490 | 0.0898943948  | 0.5040766233  |
| C | -1.6264681352 | -1.3058583372 | 0.4576584896  |
| C | -2.7321515084 | 0.8003638059  | 0.0264390814  |
| C | -2.7191328528 | -1.9954098798 | -0.0678481221 |
| H | -2.7067188868 | -3.0828147302 | -0.1098707313 |
| C | -3.8136804372 | -1.2812697535 | -0.5356593745 |
| H | -4.6731447957 | -1.8087455829 | -0.9455587026 |
| C | -3.8293331298 | 0.1108970332  | -0.4947285571 |
| H | -4.6952162874 | 0.6489567587  | -0.8685093374 |
| C | 3.8201173235  | 0.3085739914  | 0.0472702634  |
| O | 4.2241650237  | -0.6044437853 | 0.7224063084  |
| O | 4.2431360807  | 1.5635156624  | 0.2067978644  |
| H | 4.8841807545  | 1.5721331464  | 0.9334815489  |
| O | -2.6647117132 | 2.1469723216  | 0.1100996460  |
| C | -3.7378786503 | 2.9119515305  | -0.3760161669 |
| H | -4.6679302995 | 2.6950363789  | 0.1679991813  |
| H | -3.4712511211 | 3.9605234032  | -0.2231091681 |
| H | -3.9065420414 | 2.7361888030  | -1.4478241219 |

Electronic Energy (RPW6B95D3/def2-SVP)= -862.754084314 (Hartree/Particle)  
Dipole Moment= 5.1864 (Debye)  
Number of imaginary frequencies 0

THERMOCHEMICAL DATA (Temperature 298.150 Kelvin. Pressure 1.00000 Atm)

Zero-point correction= 0.301926 (Hartree/Particle)  
 Sum of electronic and zero-point Energies= -862.452159  
 Sum of electronic and thermal Energies= -862.436004  
 Sum of electronic and thermal Enthalpies= -862.435060  
 Sum of electronic and thermal Free Energies= -862.497718

Electronic Energy SP (RPW6B95D3/def2-QZVPP)= -863.759902822 (Hartree/Particle)  
 Corrected Free Energy= -863.503536508 (Hartree/Particle)

CONFORMER 11

CARTESIAN COORDINATES

|   |               |               |               |
|---|---------------|---------------|---------------|
| C | -0.5034891264 | 0.9173851554  | -0.6417103284 |
| C | 0.8372680665  | 0.3748668379  | -0.1494328913 |
| C | -0.2585444153 | -1.8948525347 | 0.2057661986  |
| H | -0.5083005534 | 0.9061635001  | -1.7433841999 |
| H | -0.5945790458 | 1.9724458749  | -0.3601462811 |
| H | -0.3490395235 | -2.8353463484 | -0.3507020474 |
| H | 0.0267793807  | -2.1873237430 | 1.2292708138  |
| H | 0.8788522789  | 0.5346761287  | 0.9411618345  |
| C | 2.0034014563  | 1.0967970405  | -0.8088776262 |
| C | 3.0380903612  | -1.0867205460 | -1.3543929887 |
| C | 3.2701333503  | 0.2630298561  | -0.6928674325 |
| H | 2.1343186188  | 2.0905295235  | -0.3694530318 |
| H | 1.7875845380  | 1.2397615023  | -1.8757403427 |
| H | 3.8868837845  | -1.7498928256 | -1.1501707510 |
| H | 3.0018021186  | -0.9595476449 | -2.4457808192 |
| H | 4.0997471195  | 0.7780109009  | -1.1991093387 |
| C | 0.8978003388  | -1.1191051081 | -0.3624142639 |
| N | 1.8349551471  | -1.7662644515 | -0.9258021802 |
| C | -1.6887012117 | 0.1553616321  | -0.1292998340 |
| C | -1.5792078863 | -1.1756809206 | 0.2673826653  |
| C | -2.9466105953 | 0.7876841990  | -0.0695454333 |
| C | -2.7078276544 | -1.8617898416 | 0.7334613139  |
| H | -2.6115123327 | -2.9011246278 | 1.0432662956  |
| C | -3.9348918866 | -1.2253705918 | 0.7966059349  |
| H | -4.8103500664 | -1.7613931120 | 1.1586442016  |
| C | -4.0664697156 | 0.1038181993  | 0.3962589970  |
| H | -5.0355748786 | 0.5906865060  | 0.4471367141  |
| C | 3.7299733883  | 0.0838774245  | 0.7390352738  |
| O | 4.2456265671  | -0.9104250163 | 1.1818750228  |
| O | 3.5282388481  | 1.1749630384  | 1.4805918548  |
| H | 3.8719035732  | 0.9964253546  | 2.3690140225  |
| O | -2.9750572254 | 2.0707972755  | -0.4923360408 |
| C | -4.1890820208 | 2.7754371599  | -0.4403042669 |
| H | -4.5736347602 | 2.8419509590  | 0.5871845879  |
| H | -3.9845328341 | 3.7825074606  | -0.8117451534 |
| H | -4.9549781287 | 2.3070833787  | -1.0743342699 |

Electronic Energy (RPW6B95D3/def2-SVP)= -862.755929194 (Hartree/Particle)

Dipole Moment= 5.3555 (Debye)  
 Number of imaginary frequencies 0

THERMOCHEMICAL DATA (Temperature 298.150 Kelvin. Pressure 1.00000 Atm)

Zero-point correction= 0.301598 (Hartree/Particle)  
 Sum of electronic and zero-point Energies= -862.454331  
 Sum of electronic and thermal Energies= -862.438115  
 Sum of electronic and thermal Enthalpies= -862.437171  
 Sum of electronic and thermal Free Energies= -862.499474

Electronic Energy SP (RPW6B95D3/def2-QZVPP)= -863.761016760 (Hartree/Particle)  
 Corrected Free Energy= -863.504561566 (Hartree/Particle)

-----  
CONFORMER 12

CARTESIAN COORDINATES

|   |               |               |               |
|---|---------------|---------------|---------------|
| C | -0.6664936685 | 0.3576614332  | 1.4955125561  |
| C | 0.7004828936  | -0.1758005535 | 1.0650204076  |
| C | -0.6983089527 | -2.2912897995 | 0.6979642214  |
| H | -0.6374269418 | 1.4460223559  | 1.5976732886  |
| H | -0.9074775246 | -0.0463089610 | 2.4899578081  |
| H | -0.6546328176 | -3.2603528254 | 0.1938735397  |
| H | -0.9152103512 | -2.4740610358 | 1.7636454011  |
| H | 1.3849078273  | -0.1515671335 | 1.9273777227  |
| C | 1.3355793245  | 0.6694233196  | -0.0483547946 |
| C | 2.8320059534  | -1.3760186223 | 0.0240187187  |
| C | 2.5441636468  | -0.0364474524 | -0.6895432222 |
| H | 1.6250925427  | 1.6385616822  | 0.3709750707  |
| H | 0.5758319409  | 0.8627400308  | -0.8147559737 |
| H | 3.2125366285  | -1.1585632691 | 1.0348946076  |
| H | 3.6217988504  | -1.9168415136 | -0.5090470271 |
| H | 2.3384538740  | -0.2638710708 | -1.7392606399 |
| C | 0.6332064608  | -1.6060551821 | 0.6013373229  |
| N | 1.6425729043  | -2.1927974022 | 0.0950426186  |
| C | -1.7340666156 | -0.0577174586 | 0.5261833057  |
| C | -1.7610096112 | -1.3944057261 | 0.1228543448  |
| C | -2.6862488481 | 0.8365549066  | 0.0133984647  |
| C | -2.7204645780 | -1.8439400895 | -0.7844593989 |
| H | -2.7266498428 | -2.8863828522 | -1.0970042855 |
| C | -3.6601727044 | -0.9509043480 | -1.2804740744 |
| H | -4.4146819905 | -1.2913780291 | -1.9873327558 |
| C | -3.6510626775 | 0.3860894085  | -0.8904239577 |
| H | -4.3934960408 | 1.0678553114  | -1.2941132010 |
| C | 3.7919321031  | 0.8038325656  | -0.6880839987 |
| O | 4.4883401174  | 1.0186482577  | -1.6467608380 |
| O | 4.0790237193  | 1.2749567918  | 0.5294394993  |
| H | 4.8992654322  | 1.7867110291  | 0.4664986418  |
| O | -2.6016876867 | 2.1137604096  | 0.4444256898  |
| C | -3.5126916613 | 3.0605473458  | -0.0526660022 |
| H | -3.2577330098 | 4.0160498292  | 0.4120560877  |
| H | -3.4365981687 | 3.1601043731  | -1.1446114544 |
| H | -4.5483299789 | 2.8001490251  | 0.2072665567  |

Electronic Energy (RPW6B95D3/def2-SVP)= -862.752183864 (Hartree/Particle)

Dipole Moment= 4.8682 (Debye)

Number of imaginary frequencies 0

THERMOCHEMICAL DATA (Temperature 298.150 Kelvin. Pressure 1.00000 Atm)

Zero-point correction= 0.302145 (Hartree/Particle)

Sum of electronic and zero-point Energies= -862.450039

Sum of electronic and thermal Energies= -862.433849

Sum of electronic and thermal Enthalpies= -862.432905

Sum of electronic and thermal Free Energies= -862.495816

Electronic Energy SP (RPW6B95D3/def2-QZVPP)= -863.759926921 (Hartree/Particle)

Corrected Free Energy= -863.503559057 (Hartree/Particle)

-----  
CONFORMER 13

CARTESIAN COORDINATES

|   |               |               |              |
|---|---------------|---------------|--------------|
| C | -0.4614820590 | 0.6966811683  | 1.1642459707 |
| C | 0.8882429842  | 0.1601158113  | 0.6522941102 |
| C | -0.3812593686 | -2.0347395859 | 0.7623214641 |
| H | -0.4941637655 | 1.7848268944  | 1.0587736223 |

|   |               |               |               |
|---|---------------|---------------|---------------|
| H | -0.5356016332 | 0.4906218307  | 2.2417899865  |
| H | -0.3602343608 | -3.0720402497 | 0.4192744447  |
| H | -0.3114292493 | -2.0234287026 | 1.8614336996  |
| H | 1.5772590231  | 0.1441887289  | 1.5109632011  |
| C | 1.5068292135  | 1.0108123253  | -0.4455518914 |
| C | 2.4987136672  | -1.0660244491 | -1.4309398433 |
| C | 2.7972571726  | 0.3486446877  | -0.9365914354 |
| H | 1.7144892598  | 2.0239981199  | -0.0830339245 |
| H | 0.8055860504  | 1.0981164875  | -1.2867495638 |
| H | 3.4167662587  | -1.6670496150 | -1.4386943809 |
| H | 2.1795119238  | -1.0086855342 | -2.4818088927 |
| H | 3.2134294066  | 0.9431700714  | -1.7580129088 |
| C | 0.7747733544  | -1.2722028869 | 0.1730314389  |
| N | 1.4799974516  | -1.8130591955 | -0.7316399137 |
| C | -1.6399497359 | 0.0646683052  | 0.4852206370  |
| C | -1.6304305771 | -1.3217086960 | 0.3173255049  |
| C | -2.7503042894 | 0.8040281508  | 0.0498851946  |
| C | -2.7059296868 | -1.9724606538 | -0.2872574614 |
| H | -2.6812621601 | -3.0519147519 | -0.4234160491 |
| C | -3.7991089017 | -1.2300900995 | -0.7122743561 |
| H | -4.6452017137 | -1.7274733213 | -1.1830743833 |
| C | -3.8301803233 | 0.1530112639  | -0.5507184489 |
| H | -4.6946037686 | 0.7138769123  | -0.8930151052 |
| C | 3.8242233307  | 0.4267208043  | 0.1680908077  |
| O | 4.4127281060  | 1.4337643330  | 0.4699639877  |
| O | 3.9943060296  | -0.7264017025 | 0.8188922163  |
| H | 4.6423363631  | -0.5777380901 | 1.5243398751  |
| O | -2.6989392537 | 2.1386471975  | 0.2523395562  |
| C | -3.7707177304 | 2.9337200762  | -0.1862692927 |
| H | -4.7088675530 | 2.6606332518  | 0.3170102513  |
| H | -3.5188160429 | 3.9670116019  | 0.0643514950  |
| H | -3.9161731174 | 2.8522501575  | -1.2726950358 |

Electronic Energy (RPW6B95D3/def2-SVP)= -862.752767366 (Hartree/Particle)

Dipole Moment= 2.5892 (Debye)

Number of imaginary frequencies 0

THERMOCHEMICAL DATA (Temperature 298.150 Kelvin. Pressure 1.00000 Atm)

Zero-point correction= 0.302064 (Hartree/Particle)

Sum of electronic and zero-point Energies= -862.450703

Sum of electronic and thermal Energies= -862.434634

Sum of electronic and thermal Enthalpies= -862.433689

Sum of electronic and thermal Free Energies= -862.495243

Electronic Energy SP (RPW6B95D3/def2-QZVPP)= -863.758550385 (Hartree/Particle)

Corrected Free Energy= -863.501026019 (Hartree/Particle)

-----  
CONFORMER 14

CARTESIAN COORDINATES

|   |               |               |               |
|---|---------------|---------------|---------------|
| C | -0.5863556203 | 0.7068149015  | -0.9072434361 |
| C | 0.6405531641  | 0.1327392488  | -0.2043024420 |
| C | -0.6122455536 | -2.0606894750 | -0.6637393192 |
| H | -0.4908345504 | 0.5181730327  | -1.9886453205 |
| H | -0.6276687307 | 1.7921259680  | -0.7816042510 |
| H | -0.5502897214 | -2.0680476563 | -1.7656353586 |
| H | -0.6150113416 | -3.1032110594 | -0.3337275970 |
| H | 0.6084891457  | 0.4544471321  | 0.8499396306  |
| C | 1.9667421026  | 0.6314525417  | -0.7924835198 |
| C | 2.7220587562  | -1.2350317293 | 0.7411715049  |
| C | 3.1551946889  | -0.2442964531 | -0.3574875546 |
| H | 2.1165528469  | 1.6715421238  | -0.4848205337 |
| H | 1.8942929332  | 0.6276624558  | -1.8860251271 |

|   |               |               |               |
|---|---------------|---------------|---------------|
| H | 2.4578127868  | -0.6637314877 | 1.6459640013  |
| H | 3.5613677734  | -1.8878483430 | 1.0061292457  |
| H | 3.5149634760  | -0.8386094929 | -1.2024716985 |
| C | 0.6215810990  | -1.3710499789 | -0.1563779078 |
| N | 1.6008524878  | -2.0375754930 | 0.3077168027  |
| C | -1.8415721308 | 0.0653653767  | -0.3954351822 |
| C | -1.8577029048 | -1.3238315445 | -0.2567181349 |
| C | -2.9791777362 | 0.8067804026  | -0.0400411095 |
| C | -2.9892629065 | -1.9751684032 | 0.2353576039  |
| H | -2.9876526879 | -3.0580016767 | 0.3448510026  |
| C | -4.1087777097 | -1.2314419775 | 0.5811923878  |
| H | -4.9967631100 | -1.7302885211 | 0.9652319931  |
| C | -4.1137984884 | 0.1548499552  | 0.4476804546  |
| H | -4.9994077568 | 0.7181557729  | 0.7259121625  |
| C | 4.3397063906  | 0.5533974253  | 0.1152423984  |
| O | 5.4668999864  | 0.4330575199  | -0.2913970520 |
| O | 4.0131930605  | 1.4124359961  | 1.0855842225  |
| H | 4.8188468456  | 1.8769518726  | 1.3572372003  |
| O | -2.8969598244 | 2.1453457467  | -0.2014060977 |
| C | -3.9962761923 | 2.9417835808  | 0.1596501640  |
| H | -4.2415472220 | 2.8329954621  | 1.2255419697  |
| H | -3.7118669313 | 3.9781963875  | -0.0376695025 |
| H | -4.8870676382 | 2.6947995070  | -0.4348744583 |

Electronic Energy (RPW6B95D3/def2-SVP)= -862.751844743 (Hartree/Particle)

Dipole Moment= 5.3757 (Debye)

Number of imaginary frequencies 0

THERMOCHEMICAL DATA (Temperature 298.150 Kelvin. Pressure 1.00000 Atm)

Zero-point correction= 0.301975 (Hartree/Particle)

Sum of electronic and zero-point Energies= -862.449870

Sum of electronic and thermal Energies= -862.433614

Sum of electronic and thermal Enthalpies= -862.432670

Sum of electronic and thermal Free Energies= -862.494977

Electronic Energy SP (RPW6B95D3/def2-QZVPP)= -863.759747901 (Hartree/Particle)

Corrected Free Energy= -863.502880158 (Hartree/Particle)

-----  
CONFORMER 15

CARTESIAN COORDINATES

|   |               |               |               |
|---|---------------|---------------|---------------|
| C | -0.4488676157 | 0.7009738190  | 0.4370023957  |
| C | 0.6197450378  | -0.2403493840 | 0.9970038028  |
| C | -0.6591730812 | -2.2606764988 | 0.2255906505  |
| H | -0.0802343288 | 1.1771221352  | -0.4853116492 |
| H | -0.6156907942 | 1.5253910066  | 1.1408418777  |
| H | -0.6454396688 | -3.0450772618 | -0.5385078595 |
| H | -0.7197393839 | -2.7703866397 | 1.2007203345  |
| H | 0.2887312196  | -0.5385309290 | 2.0024911027  |
| C | 1.9958378396  | 0.4007106199  | 1.0928758632  |
| C | 2.8232109597  | -1.1974369353 | -0.6257474557 |
| C | 2.7160547108  | 0.2825265975  | -0.2358004514 |
| H | 2.5983339306  | -0.1015599568 | 1.8595690233  |
| H | 1.9129971291  | 1.4502290867  | 1.3977871351  |
| H | 3.5651922988  | -1.6969852567 | 0.0170001312  |
| H | 3.2055695123  | -1.3014531461 | -1.6507382006 |
| H | 2.1327398247  | 0.7913422005  | -1.0196497923 |
| C | 0.6303756584  | -1.5007179682 | 0.1710186088  |
| N | 1.5858037810  | -1.9339837082 | -0.5447118728 |
| C | -1.7558789076 | 0.0152945110  | 0.1551201707  |
| C | -1.8687790282 | -1.3723842132 | 0.0592191018  |
| C | -2.9059820219 | 0.8078054331  | -0.0312942959 |
| C | -3.1143106763 | -1.9563563783 | -0.2022276313 |

|   |               |               |               |
|---|---------------|---------------|---------------|
| H | -3.1904021110 | -3.0397463494 | -0.2774662670 |
| C | -4.2367825251 | -1.1641355380 | -0.3697710428 |
| H | -5.2029039653 | -1.6222581466 | -0.5734339851 |
| C | -4.1437802985 | 0.2243487952  | -0.2874111068 |
| H | -5.0299986129 | 0.8357752953  | -0.4272363536 |
| C | 4.0786631513  | 0.9308183053  | -0.2020645992 |
| O | 4.5996528827  | 1.3663112211  | 0.7890245667  |
| O | 4.7302335722  | 0.9805344303  | -1.3707112039 |
| H | 4.1888060212  | 0.6313901593  | -2.0892017447 |
| O | -2.7079510755 | 2.1412739571  | 0.0546132466  |
| C | -3.8068954265 | 3.0023767161  | -0.1030721669 |
| H | -4.5769394977 | 2.8172826985  | 0.6589021265  |
| H | -3.4274786996 | 4.0206291761  | 0.0114303360  |
| H | -4.2616907837 | 2.8975978124  | -1.0980318150 |

Electronic Energy (RPW6B95D3/def2-SVP)= -862.751409234 (Hartree/Particle)

Dipole Moment= 5.5065 (Debye)

Number of imaginary frequencies 0

THERMOCHEMICAL DATA (Temperature 298.150 Kelvin. Pressure 1.00000 Atm)

Zero-point correction= 0.301750 (Hartree/Particle)

Sum of electronic and zero-point Energies= -862.449659

Sum of electronic and thermal Energies= -862.433412

Sum of electronic and thermal Enthalpies= -862.432468

Sum of electronic and thermal Free Energies= -862.494093

Electronic Energy SP (RPW6B95D3/def2-QZVPP)= -863.759112983 (Hartree/Particle)

Corrected Free Energy= -863.501796749 (Hartree/Particle)

-----  
CONFORMER 16

CARTESIAN COORDINATES

|   |               |               |               |
|---|---------------|---------------|---------------|
| C | -0.5644670870 | 0.6677172992  | -1.0870904569 |
| C | 0.7663487436  | 0.1944524663  | -0.5048738893 |
| C | -0.4434787360 | -2.0665368533 | -0.3384722724 |
| H | -0.6269470740 | 0.3759374383  | -2.1476070535 |
| H | -0.6142509226 | 1.7601894373  | -1.0609075352 |
| H | -0.6895617409 | -2.5084091672 | -1.3178140166 |
| H | -0.2671066175 | -2.9170484411 | 0.3289323337  |
| H | 0.7630872003  | 0.4789456959  | 0.5585142019  |
| C | 1.9798203042  | 0.8318318272  | -1.1597643040 |
| C | 3.1680250322  | -1.3499177180 | -0.9961769289 |
| C | 3.2529615009  | 0.1505193683  | -0.6865878849 |
| H | 2.0080975340  | 1.9029027275  | -0.9335108342 |
| H | 1.9093689531  | 0.7265109862  | -2.2505502914 |
| H | 3.9482894055  | -1.9131238086 | -0.4637111558 |
| H | 3.3973560219  | -1.4992763614 | -2.0609494440 |
| H | 4.1199326567  | 0.5501063393  | -1.2336439853 |
| C | 0.8528305366  | -1.3108521248 | -0.5320496059 |
| N | 1.9059984164  | -1.9919011663 | -0.7311338125 |
| C | -1.7021902382 | 0.0825231516  | -0.3059057351 |
| C | -1.6133014727 | -1.2439651679 | 0.1183549593  |
| C | -2.8233987482 | 0.8491372521  | 0.0539502514  |
| C | -2.6272735658 | -1.8003753240 | 0.9025886944  |
| H | -2.5479026732 | -2.8345179396 | 1.2332071355  |
| C | -3.7290117703 | -1.0340637835 | 1.2516175073  |
| H | -4.5208776198 | -1.4641619028 | 1.8622261792  |
| C | -3.8378506612 | 0.2894670138  | 0.8313304399  |
| H | -4.7071269566 | 0.8749413444  | 1.1151510060  |
| C | 3.5372180778  | 0.4548685813  | 0.7731929353  |
| O | 2.8863543286  | 1.2015793186  | 1.4548356608  |
| O | 4.6124583951  | -0.1420149290 | 1.2985792638  |
| H | 5.0696982905  | -0.6828810319 | 0.6432876530  |



|   |               |              |               |
|---|---------------|--------------|---------------|
| O | -2.8424751020 | 2.1237787859 | -0.3941860944 |
| C | -3.9196241423 | 2.9518838713 | -0.0383117643 |
| H | -3.9998565654 | 3.0639173330 | 1.0521863089  |
| H | -3.7256514988 | 3.9299458152 | -0.4852731179 |
| H | -4.8727122589 | 2.5635216917 | -0.4240789501 |

Electronic Energy (RPW6B95D3/def2-SVP)= -862.750506564 (Hartree/Particle)

Dipole Moment= 3.7130 (Debye)

Number of imaginary frequencies 0

THERMOCHEMICAL DATA (Temperature 298.150 Kelvin. Pressure 1.00000 Atm)

Zero-point correction= 0.301628 (Hartree/Particle)

Sum of electronic and zero-point Energies= -862.448878

Sum of electronic and thermal Energies= -862.432632

Sum of electronic and thermal Enthalpies= -862.431688

Sum of electronic and thermal Free Energies= -862.494328

Electronic Energy SP (RPW6B95D3/def2-QZVPP)= -863.757044762 (Hartree/Particle)

Corrected Free Energy= -863.500866198 (Hartree/Particle)

CONFORMER 17

CARTESIAN COORDINATES

|   |               |               |               |
|---|---------------|---------------|---------------|
| C | -0.5313625035 | 1.0393259848  | -0.4318067801 |
| C | 0.8243707186  | 0.4770513408  | -0.0035808959 |
| C | -0.1868235856 | -1.8310559096 | 0.1783221435  |
| H | -0.5391086621 | 1.1684789842  | -1.5259245758 |
| H | -0.6546018365 | 2.0474766706  | -0.0190748398 |
| H | -0.2377728230 | -2.7637333633 | -0.3947945117 |
| H | 0.1277099699  | -2.1187892913 | 1.1949163429  |
| H | 0.8587026156  | 0.4888727364  | 1.0956189116  |
| C | 1.9800697124  | 1.3110660391  | -0.5489432478 |
| C | 2.9104876061  | -0.7365237506 | -1.5877619948 |
| C | 3.2378825912  | 0.4774800573  | -0.7125564606 |
| H | 2.1634496635  | 2.1697574475  | 0.1056278956  |
| H | 1.7109750998  | 1.7086465476  | -1.5358244882 |
| H | 3.7794687846  | -1.4017837263 | -1.6901898568 |
| H | 2.6966610231  | -0.3877144970 | -2.6084123815 |
| H | 4.0198340012  | 1.0637335607  | -1.2163544479 |
| C | 0.9049564341  | -0.9754944009 | -0.3936863664 |
| N | 1.7989578482  | -1.5249516625 | -1.1115614620 |
| C | -1.6934026118 | 0.1829635027  | -0.0215112643 |
| C | -1.5392832523 | -1.1731743445 | 0.2626168559  |
| C | -2.9783718740 | 0.7560407992  | 0.0538205149  |
| C | -2.6495787947 | -1.9415560677 | 0.6337133766  |
| H | -2.5177889990 | -2.9995651642 | 0.8541209212  |
| C | -3.9034572724 | -1.3619734922 | 0.7153317418  |
| H | -4.7648515868 | -1.9616726693 | 1.0036683171  |
| C | -4.0803691453 | -0.0094605447 | 0.4261112735  |
| H | -5.0704069696 | 0.4317170540  | 0.4891589296  |
| C | 3.8110953540  | 0.0598349553  | 0.6281765400  |
| O | 3.3296453401  | 0.3412964823  | 1.6933365663  |
| O | 4.9339504646  | -0.6661473426 | 0.5857782236  |
| H | 5.2316792533  | -0.8011189109 | -0.3221746933 |
| O | -3.0482131225 | 2.0684188584  | -0.2597181962 |
| C | -4.2910183421 | 2.7190415405  | -0.1867247030 |
| H | -5.0189829272 | 2.2776538336  | -0.8818133230 |
| H | -4.7066499553 | 2.6825915432  | 0.8300724960  |
| H | -4.1172964136 | 3.7612691516  | -0.4652784686 |

Electronic Energy (RPW6B95D3/def2-SVP)= -862.751449354 (Hartree/Particle)

Dipole Moment= 4.8096 (Debye)  
Number of imaginary frequencies 0

THERMOCHEMICAL DATA (Temperature 298.150 Kelvin. Pressure 1.00000 Atm)

Zero-point correction= 0.301622 (Hartree/Particle)  
Sum of electronic and zero-point Energies= -862.449827  
Sum of electronic and thermal Energies= -862.433596  
Sum of electronic and thermal Enthalpies= -862.432652  
Sum of electronic and thermal Free Energies= -862.494544  
  
Electronic Energy SP (RPW6B95D3/def2-QZVPP)= -863.758125334 (Hartree/Particle)  
Corrected Free Energy= -863.501219980 (Hartree/Particle)

-----  
CONFORMER 18

CARTESIAN COORDINATES

|   |               |               |               |
|---|---------------|---------------|---------------|
| C | -0.5036151084 | 0.5050182372  | -1.1846760440 |
| C | 0.8116766858  | 0.0570406878  | -0.5487798406 |
| C | -0.4768939323 | -2.1429936803 | -0.2213437463 |
| H | -0.5726729734 | 0.0959769540  | -2.2050502474 |
| H | -0.5215839851 | 1.5944505904  | -1.2808663546 |
| H | -0.7245790813 | -2.5972004021 | -1.1951448091 |
| H | -0.3520719965 | -2.9804276152 | 0.4727187628  |
| H | 0.8120708791  | 0.4640499990  | 0.4769097029  |
| C | 2.0477700397  | 0.5541564359  | -1.2753202930 |
| C | 3.1954736490  | -1.5880191336 | -0.7148924880 |
| C | 3.2927157825  | -0.0691266478 | -0.6387725686 |
| H | 2.0848909854  | 1.6506419148  | -1.2600077155 |
| H | 2.0059864221  | 0.2559646976  | -2.3311961820 |
| H | 3.8969001508  | -2.0353532313 | 0.0003530462  |
| H | 3.5278503201  | -1.9197857122 | -1.7090855511 |
| H | 4.1892664156  | 0.2648879408  | -1.1796580834 |
| C | 0.8541244424  | -1.4479715235 | -0.4070096117 |
| N | 1.8953134150  | -2.1682320386 | -0.4805106397 |
| C | -1.6560002556 | 0.0396711709  | -0.3465417292 |
| C | -1.6133715826 | -1.2507248158 | 0.1835976110  |
| C | -2.7390743642 | 0.8788940339  | -0.0383002318 |
| C | -2.6359205759 | -1.7010200045 | 1.0218419030  |
| H | -2.5925257819 | -2.7071840613 | 1.4349059508  |
| C | -3.7010627447 | -0.8638465294 | 1.3190552809  |
| H | -4.5007178110 | -1.2099165635 | 1.9714805160  |
| C | -3.7634559230 | 0.4246363308  | 0.7935830576  |
| H | -4.6049971957 | 1.0653429323  | 1.0389121381  |
| C | 3.4274963987  | 0.4013720401  | 0.7954903804  |
| O | 3.2977349441  | -0.3044795053 | 1.7591756230  |
| O | 3.6751605533  | 1.7066223884  | 0.9577849423  |
| H | 3.7793662051  | 2.1493785690  | 0.1065110049  |
| O | -2.7134178600 | 2.1127275049  | -0.5883649891 |
| C | -3.7536242418 | 3.0093422896  | -0.2932566926 |
| H | -4.7256853212 | 2.6269843282  | -0.6350973050 |
| H | -3.8150292917 | 3.2161200659  | 0.7845219600  |
| H | -3.5285812537 | 3.9378221807  | -0.8235990789 |

Electronic Energy (RPW6B95D3/def2-SVP)= -862.750926408 (Hartree/Particle)

Dipole Moment= 6.9750 (Debye)  
Number of imaginary frequencies 0

THERMOCHEMICAL DATA (Temperature 298.150 Kelvin. Pressure 1.00000 Atm)

Zero-point correction= 0.301753 (Hartree/Particle)  
Sum of electronic and zero-point Energies= -862.449173  
Sum of electronic and thermal Energies= -862.432979

Sum of electronic and thermal Enthalpies= -862.432035  
Sum of electronic and thermal Free Energies= -862.493603  
Electronic Energy SP (RPW6B95D3/def2-QZVPP)= -863.757822996 (Hartree/Particle)  
Corrected Free Energy= -863.500499588 (Hartree/Particle)

-----  
CONFORMER 19

CARTESIAN COORDINATES

|   |               |               |               |
|---|---------------|---------------|---------------|
| C | -0.4905471174 | 0.7004070704  | 1.1850756281  |
| C | 0.8659970883  | 0.1778838381  | 0.6742313554  |
| C | -0.3711540175 | -2.0318691804 | 0.7753688402  |
| H | -0.5380915836 | 1.7870581935  | 1.0698094001  |
| H | -0.5599224500 | 0.5046983774  | 2.2649339306  |
| H | -0.3366381276 | -3.0670355135 | 0.4270735063  |
| H | -0.2887435833 | -2.0231201884 | 1.8735031274  |
| H | 1.5540977312  | 0.1566280412  | 1.5302704942  |
| C | 1.4964610334  | 1.0595894620  | -0.3930876465 |
| C | 2.4481239937  | -0.9951804316 | -1.4571133275 |
| C | 2.7659917709  | 0.4104636326  | -0.9209145897 |
| H | 1.7187076844  | 2.0488219941  | 0.0205254815  |
| H | 0.7913757131  | 1.1964229352  | -1.2241112179 |
| H | 3.3584053124  | -1.6064559507 | -1.5400143902 |
| H | 2.0840300323  | -0.8998148736 | -2.4897426411 |
| H | 3.1611047985  | 0.9965042866  | -1.7642525385 |
| C | 0.7620030717  | -1.2444425083 | 0.1766320589  |
| N | 1.4649171128  | -1.7680862545 | -0.7413537750 |
| C | -1.6651064031 | 0.0490065145  | 0.5170346959  |
| C | -1.6363208037 | -1.3367899404 | 0.3464015896  |
| C | -2.7929572953 | 0.7704862933  | 0.0963843500  |
| C | -2.7080831571 | -2.0040416478 | -0.2468021918 |
| H | -2.6674298390 | -3.0827629828 | -0.3849391000 |
| C | -3.8181248709 | -1.2789178893 | -0.6573841808 |
| H | -4.6616619687 | -1.7891641327 | -1.1188961179 |
| C | -3.8692738780 | 0.1032169602  | -0.4926509582 |
| H | -4.7466839549 | 0.6506751105  | -0.8234571099 |
| C | 3.8744575097  | 0.4356587569  | 0.1165627196  |
| O | 3.7924374371  | 0.9679316205  | 1.1917476650  |
| O | 5.0215493130  | -0.1567327670 | -0.2334870649 |
| H | 4.9795974578  | -0.5083544432 | -1.1311066454 |
| O | -2.7612426221 | 2.1054584770  | 0.3007599958  |
| C | -3.8506408763 | 2.8833884293  | -0.1248796387 |
| H | -4.7785470356 | 2.5945322636  | 0.3884561304  |
| H | -3.6129048225 | 3.9204171689  | 0.1241189198  |
| H | -4.0068351200 | 2.8006588832  | -1.2097047496 |

Electronic Energy (RPW6B95D3/def2-SVP)= -862.748698954 (Hartree/Particle)

Dipole Moment= 4.8919 (Debye)  
Number of imaginary frequencies 0

THERMOCHEMICAL DATA (Temperature 298.150 Kelvin. Pressure 1.00000 Atm)

Zero-point correction= 0.302126 (Hartree/Particle)  
Sum of electronic and zero-point Energies= -862.446573  
Sum of electronic and thermal Energies= -862.430573  
Sum of electronic and thermal Enthalpies= -862.429629  
Sum of electronic and thermal Free Energies= -862.490697

Electronic Energy SP (RPW6B95D3/def2-QZVPP)= -863.755412178 (Hartree/Particle)  
Corrected Free Energy= -863.497410224 (Hartree/Particle)

-----  
CONFORMER 20

CARTESIAN COORDINATES

|   |               |               |               |
|---|---------------|---------------|---------------|
| C | -0.4963815453 | 0.7342812680  | -1.0686321613 |
| C | 0.8206679357  | 0.2250332311  | -0.4859961711 |
| C | -0.4014447477 | -2.0346037149 | -0.4209433736 |
| H | -0.5372388842 | 0.4947280530  | -2.1427295977 |
| H | -0.5386992572 | 1.8244245601  | -0.9900854986 |
| H | -0.6321764049 | -2.4541366751 | -1.4136093243 |
| H | -0.2344497008 | -2.9011076521 | 0.2280059485  |
| H | 0.7815654254  | 0.4436106959  | 0.5954802321  |
| C | 2.0518584681  | 0.8855080294  | -1.0794005212 |
| C | 3.2214570352  | -1.3059877864 | -1.0541598274 |
| C | 3.3161556570  | 0.1532908831  | -0.6243483256 |
| H | 2.0935768034  | 1.9433777772  | -0.7969866504 |
| H | 2.0031117533  | 0.8427269078  | -2.1755617665 |
| H | 4.0148800705  | -1.9027924647 | -0.5834614708 |
| H | 3.4166693551  | -1.3725966431 | -2.1338427168 |
| H | 4.1912839497  | 0.6187750067  | -1.0895474421 |
| C | 0.8976245637  | -1.2805398027 | -0.5826525805 |
| N | 1.9524663214  | -1.9607761515 | -0.8004309386 |
| C | -1.6519963291 | 0.1204651728  | -0.3374437003 |
| C | -1.5767168292 | -1.2209343031 | 0.0388225107  |
| C | -2.7800229574 | 0.8771205248  | 0.0226115861  |
| C | -2.6102463011 | -1.8025838217 | 0.7777736037  |
| H | -2.5417736571 | -2.8485392046 | 1.0713585723  |
| C | -3.7175682366 | -1.0456286153 | 1.1290277953  |
| H | -4.5244377414 | -1.4952345261 | 1.7048593351  |
| C | -3.8135678219 | 0.2927143375  | 0.7550728995  |
| H | -4.6877455222 | 0.8705313593  | 1.0395252494  |
| C | 3.5094032137  | 0.3474128323  | 0.8681195215  |
| O | 4.0299874422  | 1.3231897769  | 1.3381357552  |
| O | 3.0364812701  | -0.6067355100 | 1.6802828324  |
| H | 2.6271518272  | -1.3309500461 | 1.1845888955  |
| O | -2.7849614109 | 2.1660903548  | -0.3806707260 |
| C | -3.8717668502 | 2.9836531723  | -0.0282848677 |
| H | -3.6664703007 | 3.9743498462  | -0.4409068303 |
| H | -4.8138307703 | 2.6067701739  | -0.4505172751 |
| H | -3.9801005989 | 3.0633449982  | 1.0625128311  |

Electronic Energy (RPW6B95D3/def2-SVP)= -862.750897929 (Hartree/Particle)

Dipole Moment= 5.5164 (Debye)

Number of imaginary frequencies 0

THERMOCHEMICAL DATA (Temperature 298.150 Kelvin. Pressure 1.00000 Atm)

Zero-point correction= 0.301932 (Hartree/Particle)

Sum of electronic and zero-point Energies= -862.448966

Sum of electronic and thermal Energies= -862.432864

Sum of electronic and thermal Enthalpies= -862.431919

Sum of electronic and thermal Free Energies= -862.493226

Electronic Energy SP (RPW6B95D3/def2-QZVPP)= -863.757800862 (Hartree/Particle)

Corrected Free Energy= -863.500128933 (Hartree/Particle)

CONFORMERS of ENAMINE E

CONFORMER 1

CARTESIAN COORDINATES

|   |            |            |            |
|---|------------|------------|------------|
| C | 0.5684730  | -0.9602740 | -0.3603060 |
| C | -0.7852780 | -0.3507190 | -0.5213670 |
| C | 0.0734870  | 1.9518870  | -0.0410230 |

|   |            |            |            |
|---|------------|------------|------------|
| H | 0.8236100  | -1.5437330 | -1.2602260 |
| H | 0.5412610  | -1.7201100 | 0.4385490  |
| H | 0.0793100  | 2.7565110  | -0.7937260 |
| H | -0.2014220 | 2.4510180  | 0.9020310  |
| C | -1.9048820 | -1.2998400 | -0.8380250 |
| C | -3.2582840 | 0.7484230  | -1.2352960 |
| C | -3.2885640 | -0.6630680 | -0.6634240 |
| H | -1.8282180 | -2.1955300 | -0.2055330 |
| H | -1.8043790 | -1.6622340 | -1.8720210 |
| H | -4.2365610 | 1.2339640  | -1.1503090 |
| H | -3.0008330 | 0.6921890  | -2.3040950 |
| H | -4.0264410 | -1.2631700 | -1.2040600 |
| C | -0.9932780 | 0.9681490  | -0.3896580 |
| C | 1.6738140  | 0.0084470  | -0.0759250 |
| C | 1.4539060  | 1.3734740  | 0.0777340  |
| C | 2.9852680  | -0.4920040 | 0.0455860  |
| C | 2.5303670  | 2.2291110  | 0.3468060  |
| H | 2.3483030  | 3.2961550  | 0.4641460  |
| C | 3.8132710  | 1.7237150  | 0.4622870  |
| H | 4.6466090  | 2.3919850  | 0.6713520  |
| C | 4.0539340  | 0.3581600  | 0.3128620  |
| H | 5.0644480  | -0.0280500 | 0.4057640  |
| C | -3.7167140 | -0.7299390 | 0.7974970  |
| O | -4.2171670 | -1.7204670 | 1.2697560  |
| O | -3.4886280 | 0.3420230  | 1.5418780  |
| H | -3.0324090 | 1.0311330  | 0.9870310  |
| O | 3.1074360  | -1.8279260 | -0.1144080 |
| C | 4.3824620  | -2.4081490 | -0.0095380 |
| H | 4.2544930  | -3.4812740 | -0.1707040 |
| H | 5.0704860  | -2.0097730 | -0.7684090 |
| H | 4.8201130  | -2.2432920 | 0.9850570  |
| N | -2.2833370 | 1.5273960  | -0.4876900 |
| H | -2.2760290 | 2.5091560  | -0.7380850 |

Electronic Energy (RPW6B95D3/def2-SVP)= -862.763748460 (Hartree/Particle)

Dipole Moment= 7.5973 (Debye)

Number of imaginary frequencies 0

THERMOCHEMICAL DATA (Temperature 298.150 Kelvin. Pressure 1.00000 Atm)

Zero-point correction= 0.302662 (Hartree/Particle)

Sum of electronic and zero-point Energies= -862.461086

Sum of electronic and thermal Energies= -862.445114

Sum of electronic and thermal Enthalpies= -862.444170

Sum of electronic and thermal Free Energies= -862.505171

Electronic Energy SP (RPW6B95D3/def2-QZVPP)= -863.768032389 (Hartree/Particle)

Corrected Free Energy= -863.509454929 (Hartree/Particle)

-----  
CONFORMER 2

CARTESIAN COORDINATES

|   |            |            |            |
|---|------------|------------|------------|
| C | 0.6062700  | -0.9624260 | -0.3770360 |
| C | -0.7583630 | -0.3843760 | -0.5584330 |
| C | 0.0290890  | 1.9272660  | -0.0195120 |
| H | 0.8931840  | -1.5430700 | -1.2699530 |
| H | 0.5887580  | -1.7208220 | 0.4251230  |
| H | 0.0158910  | 2.7541620  | -0.7479210 |
| H | -0.2642570 | 2.3919990  | 0.9355840  |
| C | -1.8568610 | -1.3602530 | -0.8754810 |
| C | -3.2677690 | 0.6649000  | -1.2273020 |
| C | -3.2336150 | -0.7510350 | -0.6586230 |
| H | -1.7491520 | -2.2470030 | -0.2361930 |
| H | -1.7715330 | -1.7199780 | -1.9118640 |

|   |            |            |            |
|---|------------|------------|------------|
| H | -4.2606980 | 1.1062080  | -1.0998500 |
| H | -3.0551410 | 0.6075380  | -2.3089710 |
| H | -4.0083410 | -1.3484920 | -1.1572480 |
| C | -1.0137110 | 0.9268760  | -0.4004880 |
| C | 1.6855780  | 0.0312660  | -0.0786040 |
| C | 1.4254420  | 1.3875490  | 0.0907920  |
| C | 3.0113800  | -0.4310510 | 0.0411940  |
| C | 2.4763830  | 2.2711680  | 0.3721760  |
| H | 2.2624280  | 3.3310300  | 0.5014010  |
| C | 3.7733890  | 1.8033160  | 0.4850660  |
| H | 4.5863760  | 2.4933740  | 0.7036440  |
| C | 4.0543550  | 0.4469180  | 0.3209230  |
| H | 5.0757270  | 0.0899340  | 0.4122720  |
| C | -3.5941020 | -0.7226740 | 0.8101730  |
| O | -2.9395280 | -1.1964130 | 1.7029390  |
| O | -4.7628570 | -0.1140620 | 1.0254740  |
| H | -4.9323710 | -0.1315150 | 1.9790230  |
| O | 3.1747600  | -1.7616450 | -0.1324610 |
| C | 4.4661090  | -2.3037090 | -0.0304460 |
| H | 4.3715460  | -3.3785230 | -0.2036230 |
| H | 5.1441600  | -1.8766670 | -0.7828440 |
| H | 4.8967130  | -2.1369300 | 0.9670320  |
| N | -2.2960800 | 1.4569350  | -0.5158640 |
| H | -2.3211790 | 2.4447520  | -0.7285730 |

Electronic Energy (RPW6B95D3/def2-SVP)= -862.760024957 (Hartree/Particle)

Dipole Moment= 2.4147 (Debye)

Number of imaginary frequencies 0

THERMOCHEMICAL DATA (Temperature 298.150 Kelvin. Pressure 1.00000 Atm)

Zero-point correction= 0.301663 (Hartree/Particle)

Sum of electronic and zero-point Energies= -862.458362

Sum of electronic and thermal Energies= -862.441923

Sum of electronic and thermal Enthalpies= -862.440979

Sum of electronic and thermal Free Energies= -862.503326

Electronic Energy SP (RPW6B95D3/def2-QZVPP)= -863.764093996 (Hartree/Particle)

Corrected Free Energy= -863.507395039 (Hartree/Particle)

-----  
CONFORMER 3

CARTESIAN COORDINATES

|   |            |            |            |
|---|------------|------------|------------|
| C | 0.5641550  | -0.9240920 | -0.5703280 |
| C | -0.8104840 | -0.3412610 | -0.6292020 |
| C | 0.0326990  | 1.9731600  | -0.1731270 |
| H | 0.8256770  | -1.3729240 | -1.5445900 |
| H | 0.5806890  | -1.7828350 | 0.1198690  |
| H | 0.0657860  | 2.7082480  | -0.9932180 |
| H | -0.2606870 | 2.5521900  | 0.7154210  |
| C | -1.9381360 | -1.2897790 | -0.9425810 |
| C | -3.3807570 | 0.7390180  | -1.1019790 |
| C | -3.3019950 | -0.6999280 | -0.5844000 |
| H | -1.7871460 | -2.2387760 | -0.4068630 |
| H | -1.9320980 | -1.5553030 | -2.0102110 |
| H | -4.3430650 | 1.1884610  | -0.8348530 |
| H | -3.3212230 | 0.7072790  | -2.2026190 |
| H | -4.1070150 | -1.2762450 | -1.0492730 |
| C | -1.0456550 | 0.9829430  | -0.4732830 |
| C | 1.6415660  | 0.0348140  | -0.1687680 |
| C | 1.4010760  | 1.3904420  | 0.0307900  |
| C | 2.9463230  | -0.4635300 | 0.0180110  |
| C | 2.4486050  | 2.2376070  | 0.4162390  |
| H | 2.2497540  | 3.2967920  | 0.5713090  |

|   |            |            |            |
|---|------------|------------|------------|
| C | 3.7243740  | 1.7338150  | 0.5976270  |
| H | 4.5352000  | 2.3952410  | 0.8972870  |
| C | 3.9864000  | 0.3783280  | 0.4000130  |
| H | 4.9912670  | -0.0066260 | 0.5449220  |
| C | -3.5973880 | -0.7236450 | 0.9043780  |
| O | -4.7064850 | -0.8695110 | 1.3501670  |
| O | -2.5610860 | -0.5526810 | 1.7229490  |
| H | -1.7497460 | -0.3809070 | 1.2036880  |
| O | 3.0920380  | -1.7889030 | -0.1997810 |
| C | 4.3596660  | -2.3682960 | -0.0246500 |
| H | 4.7190360  | -2.2479840 | 1.0070190  |
| H | 4.2523380  | -3.4332800 | -0.2442950 |
| H | 5.1005520  | -1.9325930 | -0.7096340 |
| N | -2.3156760 | 1.5133720  | -0.5215050 |
| H | -2.3880090 | 2.5168420  | -0.5925580 |

Electronic Energy (RPW6B95D3/def2-SVP)= -862.759647187 (Hartree/Particle)

Dipole Moment= 6.9596 (Debye)

Number of imaginary frequencies 0

THERMOCHEMICAL DATA (Temperature 298.150 Kelvin. Pressure 1.00000 Atm)

Zero-point correction= 0.301877 (Hartree/Particle)

Sum of electronic and zero-point Energies= -862.457770

Sum of electronic and thermal Energies= -862.441394

Sum of electronic and thermal Enthalpies= -862.440449

Sum of electronic and thermal Free Energies= -862.502218

Electronic Energy SP (RPW6B95D3/def2-QZVPP)= -863.764640522 (Hartree/Particle)

Corrected Free Energy= -863.507211335 (Hartree/Particle)

-----  
CONFORMER 4

CARTESIAN COORDINATES

|   |            |            |            |
|---|------------|------------|------------|
| C | 0.5473740  | -0.9207530 | -0.5581400 |
| C | -0.8259720 | -0.3487460 | -0.6933350 |
| C | -0.0472800 | 1.9544530  | -0.1046460 |
| H | 0.8528140  | -1.4125600 | -1.4981230 |
| H | 0.5341220  | -1.7493310 | 0.1695420  |
| H | -0.0265260 | 2.7726280  | -0.8403620 |
| H | -0.3741570 | 2.4318570  | 0.8342150  |
| C | -1.9351510 | -1.3143810 | -0.9988140 |
| C | -3.4183410 | 0.6647540  | -1.1661040 |
| C | -3.2750240 | -0.7271410 | -0.5655650 |
| H | -1.7541090 | -2.2612100 | -0.4753280 |
| H | -1.9786940 | -1.5626340 | -2.0700350 |
| H | -4.3615660 | 1.1244330  | -0.8589430 |
| H | -3.4403040 | 0.5640890  | -2.2606780 |
| H | -4.0948520 | -1.3710830 | -0.9126990 |
| C | -1.0851380 | 0.9627020  | -0.5240260 |
| C | 1.6075770  | 0.0559460  | -0.1532860 |
| C | 1.3370430  | 1.4019600  | 0.0727960  |
| C | 2.9255870  | -0.4144810 | 0.0126930  |
| C | 2.3699640  | 2.2662690  | 0.4611930  |
| H | 2.1482560  | 3.3180490  | 0.6355200  |
| C | 3.6590150  | 1.7902870  | 0.6211010  |
| H | 4.4576130  | 2.4655790  | 0.9230240  |
| C | 3.9504430  | 0.4444970  | 0.3979680  |
| H | 4.9654910  | 0.0808840  | 0.5261930  |
| C | -3.3961200 | -0.6511740 | 0.9393550  |
| O | -3.8029120 | 0.3063660  | 1.5495280  |
| O | -3.0255120 | -1.7785800 | 1.5479290  |
| H | -3.1453850 | -1.6507500 | 2.5009650  |
| O | 3.0998400  | -1.7335390 | -0.2261410 |

|   |            |            |            |
|---|------------|------------|------------|
| C | 4.3840040  | -2.2831400 | -0.0817150 |
| H | 5.1024870  | -1.8176370 | -0.7711430 |
| H | 4.7581530  | -2.1709030 | 0.9457210  |
| H | 4.3001970  | -3.3468770 | -0.3174910 |
| N | -2.3301740 | 1.5306970  | -0.7675940 |
| H | -2.5915450 | 2.2302860  | -0.0845890 |

Electronic Energy (RPW6B95D3/def2-SVP)= -862.759384025 (Hartree/Particle)

Dipole Moment= 1.9644 (Debye)

Number of imaginary frequencies 0

THERMOCHEMICAL DATA (Temperature 298.150 Kelvin. Pressure 1.00000 Atm)

Zero-point correction= 0.301494 (Hartree/Particle)

Sum of electronic and zero-point Energies= -862.457890

Sum of electronic and thermal Energies= -862.441352

Sum of electronic and thermal Enthalpies= -862.440408

Sum of electronic and thermal Free Energies= -862.503200

Electronic Energy SP (RPW6B95D3/def2-QZVPP)= -863.763219899 (Hartree/Particle)

Corrected Free Energy= -863.507035874 (Hartree/Particle)

-----  
CONFORMER 5

CARTESIAN COORDINATES

|   |            |            |            |
|---|------------|------------|------------|
| C | 0.5887260  | -0.9549260 | -0.4966920 |
| C | -0.7912220 | -0.4041380 | -0.6521190 |
| C | -0.0383810 | 1.9258800  | -0.1347620 |
| H | 0.8970440  | -1.4815360 | -1.4165410 |
| H | 0.5844800  | -1.7533540 | 0.2640910  |
| H | -0.0325290 | 2.7233100  | -0.8931610 |
| H | -0.3664750 | 2.4253410  | 0.7921960  |
| C | -1.8846410 | -1.4011890 | -0.9184790 |
| C | -3.3635110 | 0.5614980  | -1.2302790 |
| C | -3.2429190 | -0.8104240 | -0.5719260 |
| H | -1.7117640 | -2.2972260 | -0.3088890 |
| H | -1.8833280 | -1.7350150 | -1.9667580 |
| H | -4.3331930 | 1.0199550  | -1.0226170 |
| H | -3.2952500 | 0.4166530  | -2.3184600 |
| H | -4.0487380 | -1.4611000 | -0.9408460 |
| C | -1.0638000 | 0.9085800  | -0.5218140 |
| C | 1.6399080  | 0.0476780  | -0.1334710 |
| C | 1.3540410  | 1.3970870  | 0.0499420  |
| C | 2.9650700  | -0.4002680 | 0.0372570  |
| C | 2.3786430  | 2.2869620  | 0.4005990  |
| H | 2.1447430  | 3.3411340  | 0.5413440  |
| C | 3.6748310  | 1.8329670  | 0.5655610  |
| H | 4.4671640  | 2.5278970  | 0.8379650  |
| C | 3.9817500  | 0.4841380  | 0.3851700  |
| H | 5.0025110  | 0.1384250  | 0.5171410  |
| C | -3.4199000 | -0.7489820 | 0.9303560  |
| O | -2.9169490 | -1.5094510 | 1.7176820  |
| O | -4.2345250 | 0.2368030  | 1.3151350  |
| H | -4.3189120 | 0.1891740  | 2.2792720  |
| O | 3.1541700  | -1.7243470 | -0.1588370 |
| C | 4.4462410  | -2.2533540 | -0.0084110 |
| H | 5.1533210  | -1.8004460 | -0.7177390 |
| H | 4.8272280  | -2.1053170 | 1.0119460  |
| H | 4.3738400  | -3.3247720 | -0.2108710 |
| N | -2.3171710 | 1.4512100  | -0.7874520 |
| H | -2.6105330 | 2.1653180  | -0.1333360 |

Electronic Energy (RPW6B95D3/def2-SVP)= -862.758727010 (Hartree/Particle)



Dipole Moment= 1.5552 (Debye)  
Number of imaginary frequencies 0

THERMOCHEMICAL DATA (Temperature 298.150 Kelvin. Pressure 1.00000 Atm)

Zero-point correction= 0.301447 (Hartree/Particle)  
Sum of electronic and zero-point Energies= -862.457280  
Sum of electronic and thermal Energies= -862.440726  
Sum of electronic and thermal Enthalpies= -862.439781  
Sum of electronic and thermal Free Energies= -862.503181  
  
Electronic Energy SP (RPW6B95D3/def2-QZVPP)= -863.762527277 (Hartree/Particle)  
Corrected Free Energy= -863.506981267 (Hartree/Particle)

-----  
CONFORMER 6

CARTESIAN COORDINATES

|   |            |            |            |
|---|------------|------------|------------|
| C | 0.5780790  | -0.9353780 | -0.4297400 |
| C | -0.7823100 | -0.3434740 | -0.5946050 |
| C | 0.0196170  | 1.9488880  | 0.0012230  |
| H | 0.8649410  | -1.4873260 | -1.3408310 |
| H | 0.5541010  | -1.7202990 | 0.3464000  |
| H | 0.0163750  | 2.7866480  | -0.7148230 |
| H | -0.2731220 | 2.4018860  | 0.9619880  |
| C | -1.8884180 | -1.2968100 | -0.9496400 |
| C | -3.3102130 | 0.7356930  | -1.1895440 |
| C | -3.2606050 | -0.6977940 | -0.6710570 |
| H | -1.7661530 | -2.2314250 | -0.3874920 |
| H | -1.8300180 | -1.5795710 | -2.0118790 |
| H | -4.2972540 | 1.1677230  | -0.9977270 |
| H | -3.1471620 | 0.7182060  | -2.2807280 |
| H | -4.0401500 | -1.2795130 | -1.1807900 |
| C | -1.0310920 | 0.9644300  | -0.3997650 |
| C | 1.6619240  | 0.0415960  | -0.0951400 |
| C | 1.4107920  | 1.3949470  | 0.1082140  |
| C | 2.9829980  | -0.4344450 | 0.0234430  |
| C | 2.4664850  | 2.2622730  | 0.4210370  |
| H | 2.2599510  | 3.3200920  | 0.5764440  |
| C | 3.7589390  | 1.7811820  | 0.5315090  |
| H | 4.5755010  | 2.4588370  | 0.7742340  |
| C | 4.0305490  | 0.4273240  | 0.3343410  |
| H | 5.0482420  | 0.0596190  | 0.4243650  |
| C | -3.6665860 | -0.6841040 | 0.7886520  |
| O | -4.6533750 | -0.1261620 | 1.1989670  |
| O | -2.8463590 | -1.3610560 | 1.5905790  |
| H | -3.2011590 | -1.2986750 | 2.4902460  |
| O | 3.1372880  | -1.7613790 | -0.1833980 |
| C | 4.4230600  | -2.3166360 | -0.0815470 |
| H | 4.3215460  | -3.3861200 | -0.2816610 |
| H | 5.1123130  | -1.8772140 | -0.8164190 |
| H | 4.8446140  | -2.1775310 | 0.9240210  |
| N | -2.3093810 | 1.5041140  | -0.4927010 |
| H | -2.3366320 | 2.4984840  | -0.6699100 |

Electronic Energy (RPW6B95D3/def2-SVP)= -862.758709376 (Hartree/Particle)

Dipole Moment= 2.5001 (Debye)  
Number of imaginary frequencies 0

THERMOCHEMICAL DATA (Temperature 298.150 Kelvin. Pressure 1.00000 Atm)

Zero-point correction= 0.301694 (Hartree/Particle)  
Sum of electronic and zero-point Energies= -862.457016

Sum of electronic and thermal Energies= -862.440525  
 Sum of electronic and thermal Enthalpies= -862.439581  
 Sum of electronic and thermal Free Energies= -862.502682

Electronic Energy SP (RPW6B95D3/def2-QZVPP)= -863.762659871 (Hartree/Particle)  
 Corrected Free Energy= -863.506632495 (Hartree/Particle)

-----  
 CONFORMER 7

CARTESIAN COORDINATES

|   |            |            |            |
|---|------------|------------|------------|
| C | -0.6188280 | 0.8480350  | 0.0399090  |
| C | 0.6585590  | 0.0749520  | 0.0285000  |
| C | -0.5364500 | -2.1173990 | -0.1097380 |
| H | -0.6399730 | 1.5589420  | -0.8042850 |
| H | -0.6559610 | 1.5059670  | 0.9251080  |
| H | -0.4855410 | -2.7248070 | -1.0272730 |
| H | -0.5138700 | -2.8512370 | 0.7123090  |
| C | 1.9218930  | 0.8857110  | 0.0655710  |
| C | 3.0854290  | -1.3159250 | 0.3289350  |
| C | 3.1368490  | 0.0480370  | -0.3353350 |
| H | 2.0744680  | 1.3153560  | 1.0696970  |
| H | 1.8355160  | 1.7476200  | -0.6101850 |
| H | 3.1359100  | -1.1764630 | 1.4238450  |
| H | 3.9581800  | -1.9104970 | 0.0400430  |
| H | 3.0996740  | -0.1009930 | -1.4251900 |
| C | 0.6924030  | -1.2692510 | -0.0328790 |
| C | -1.8647200 | 0.0193340  | 0.0023470  |
| C | -1.8377260 | -1.3699730 | -0.0705100 |
| C | -3.1092470 | 0.6792470  | 0.0355610  |
| C | -3.0394260 | -2.0906090 | -0.1075020 |
| H | -3.0084430 | -3.1776610 | -0.1634880 |
| C | -4.2541630 | -1.4290430 | -0.0730690 |
| H | -5.1846020 | -1.9932660 | -0.1020600 |
| C | -4.3017160 | -0.0367710 | -0.0013140 |
| H | -5.2602440 | 0.4727350  | 0.0244290  |
| C | 4.4344160  | 0.7483790  | -0.0443490 |
| O | 5.3570410  | 0.2738430  | 0.5693830  |
| O | 4.4656010  | 1.9827160  | -0.5483710 |
| H | 5.3237320  | 2.3731240  | -0.3246070 |
| O | -3.0430880 | 2.0275960  | 0.1029690  |
| C | -4.2392720 | 2.7623970  | 0.1398140  |
| H | -3.9598130 | 3.8174820  | 0.1929510  |
| H | -4.8435770 | 2.5955470  | -0.7630370 |
| H | -4.8439700 | 2.5057280  | 1.0210820  |
| N | 1.8801770  | -1.9871930 | -0.0868610 |
| H | 1.8028260  | -2.9431930 | 0.2311840  |

Electronic Energy (RPW6B95D3/def2-SVP)= -862.758334427 (Hartree/Particle)

Dipole Moment= 2.0544 (Debye)  
 Number of imaginary frequencies 0

THERMOCHEMICAL DATA (Temperature 298.150 Kelvin. Pressure 1.00000 Atm)

Zero-point correction= 0.301534 (Hartree/Particle)  
 Sum of electronic and zero-point Energies= -862.456801  
 Sum of electronic and thermal Energies= -862.440181  
 Sum of electronic and thermal Enthalpies= -862.439236  
 Sum of electronic and thermal Free Energies= -862.501925

Electronic Energy SP (RPW6B95D3/def2-QZVPP)= -863.763439082 (Hartree/Particle)  
 Corrected Free Energy= -863.507029655 (Hartree/Particle)

-----  
 CONFORMER 8

CARTESIAN COORDINATES

|   |            |            |            |
|---|------------|------------|------------|
| C | -0.6542670 | 0.8671590  | 0.1092600  |
| C | 0.6395400  | 0.1199780  | 0.1171540  |
| C | -0.5165940 | -2.0998340 | 0.0537490  |
| H | -0.6647960 | 1.5846470  | -0.7279970 |
| H | -0.7279750 | 1.5158220  | 0.9996060  |
| H | -0.4186530 | -2.7683060 | -0.8177820 |
| H | -0.5156950 | -2.7751920 | 0.9228630  |
| C | 1.8888270  | 0.9508410  | 0.0814130  |
| C | 3.1017600  | -1.1855200 | 0.4638810  |
| C | 3.0948350  | 0.1284230  | -0.3332370 |
| H | 2.0933580  | 1.4226300  | 1.0549360  |
| H | 1.7496450  | 1.7860710  | -0.6200570 |
| H | 3.2243130  | -0.9345640 | 1.5297930  |
| H | 3.9543050  | -1.8075250 | 0.1763490  |
| H | 3.0282480  | -0.1390950 | -1.3970350 |
| C | 0.6941310  | -1.2250040 | 0.1289110  |
| C | -1.8826610 | 0.0152960  | 0.0236930  |
| C | -1.8289980 | -1.3745860 | -0.0174610 |
| C | -3.1379490 | 0.6537390  | -0.0254190 |
| C | -3.0146230 | -2.1165010 | -0.1096720 |
| H | -2.9624880 | -3.2037430 | -0.1411750 |
| C | -4.2399760 | -1.4760060 | -0.1587560 |
| H | -5.1577940 | -2.0568620 | -0.2305470 |
| C | -4.3144370 | -0.0836800 | -0.1166510 |
| H | -5.2811250 | 0.4092680  | -0.1555140 |
| C | 4.3875370  | 0.8706300  | -0.1441760 |
| O | 4.5228410  | 1.9040140  | 0.4607260  |
| O | 5.4135870  | 0.2319340  | -0.7127300 |
| H | 6.2177430  | 0.7412240  | -0.5320610 |
| O | -3.0983690 | 2.0041540  | 0.0209140  |
| C | -4.3069110 | 2.7179600  | -0.0237200 |
| H | -4.0488300 | 3.7786260  | 0.0263010  |
| H | -4.8557390 | 2.5250090  | -0.9563100 |
| H | -4.9566310 | 2.4654350  | 0.8261580  |
| N | 1.8847200  | -1.9270860 | 0.2721950  |
| H | 1.9633210  | -2.7520200 | -0.3080060 |

Electronic Energy (RPW6B95D3/def2-SVP)= -862.757449729 (Hartree/Particle)

Dipole Moment= 2.5963 (Debye)

Number of imaginary frequencies 0

THERMOCHEMICAL DATA (Temperature 298.150 Kelvin. Pressure 1.00000 Atm)

Zero-point correction= 0.301280 (Hartree/Particle)

Sum of electronic and zero-point Energies= -862.456170

Sum of electronic and thermal Energies= -862.439428

Sum of electronic and thermal Enthalpies= -862.438484

Sum of electronic and thermal Free Energies= -862.501789

Electronic Energy SP (RPW6B95D3/def2-QZVPP)= -863.762802668 (Hartree/Particle)

Corrected Free Energy= -863.507141939 (Hartree/Particle)

CONFORMER 9

CARTESIAN COORDINATES

|   |            |            |            |
|---|------------|------------|------------|
| C | 0.6235180  | -0.8612900 | -0.0114880 |
| C | -0.6559130 | -0.0918840 | 0.0041320  |
| C | 0.5324510  | 2.1083470  | -0.0521630 |
| H | 0.6499470  | -1.5377340 | -0.8834110 |
| H | 0.6596050  | -1.5536480 | 0.8469580  |
| H | 0.4829430  | 2.7451280  | -0.9496680 |

|   |            |            |            |
|---|------------|------------|------------|
| H | 0.5050080  | 2.8145730  | 0.7934430  |
| C | -1.9190740 | -0.9033260 | 0.0066940  |
| C | -3.0882070 | 1.2722220  | 0.3335250  |
| C | -3.1286320 | -0.0629370 | -0.4097370 |
| H | -2.1018060 | -1.3405300 | 1.0007190  |
| H | -1.8126980 | -1.7567390 | -0.6791250 |
| H | -3.1437130 | 1.0688070  | 1.4172750  |
| H | -3.9553750 | 1.8879560  | 0.0675360  |
| H | -3.0793970 | 0.1406530  | -1.4847250 |
| C | -0.6931990 | 1.2535070  | -0.0080400 |
| C | 1.8667560  | -0.0276540 | -0.0115260 |
| C | 1.8357230  | 1.3633450  | -0.0330010 |
| C | 3.1132080  | -0.6846700 | 0.0040190  |
| C | 3.0353270  | 2.0883640  | -0.0366940 |
| H | 3.0011920  | 3.1766360  | -0.0525510 |
| C | 4.2519370  | 1.4295770  | -0.0203500 |
| H | 5.1807170  | 1.9972420  | -0.0234620 |
| C | 4.3035570  | 0.0357760  | 0.0001040  |
| H | 5.2635450  | -0.4714810 | 0.0120760  |
| C | -4.4224430 | -0.7902790 | -0.1775180 |
| O | -5.1955730 | -1.1322110 | -1.0357580 |
| O | -4.6384400 | -1.0311690 | 1.1193050  |
| H | -5.4815000 | -1.5022540 | 1.1979350  |
| O | 3.0509980  | -2.0347500 | 0.0210140  |
| C | 4.2492880  | -2.7668680 | 0.0375970  |
| H | 4.8579160  | -2.5654020 | -0.8552350 |
| H | 4.8483840  | -2.5406150 | 0.9309370  |
| H | 3.9728700  | -3.8239990 | 0.0507410  |
| N | -1.8842260 | 1.9654340  | -0.0397440 |
| H | -1.8197180 | 2.9150250  | 0.2989500  |

Electronic Energy (RPW6B95D3/def2-SVP)= -862.756679750 (Hartree/Particle)

Dipole Moment= 3.2046 (Debye)

Number of imaginary frequencies 0

THERMOCHEMICAL DATA (Temperature 298.150 Kelvin. Pressure 1.00000 Atm)

Zero-point correction= 0.301547 (Hartree/Particle)

Sum of electronic and zero-point Energies= -862.455133

Sum of electronic and thermal Energies= -862.438420

Sum of electronic and thermal Enthalpies= -862.437476

Sum of electronic and thermal Free Energies= -862.500671

Electronic Energy SP (RPW6B95D3/def2-QZVPP)= -863.762499236 (Hartree/Particle)

Corrected Free Energy= -863.506490486 (Hartree/Particle)

-----  
CONFORMER 10

CARTESIAN COORDINATES

|   |            |            |            |
|---|------------|------------|------------|
| C | 0.6270800  | 0.8596600  | -0.0951730 |
| C | -0.6545970 | 0.0926780  | -0.1028870 |
| C | 0.5307110  | -2.1097230 | -0.0023520 |
| H | 0.6303400  | 1.5746230  | 0.7446460  |
| H | 0.6894340  | 1.5119380  | -0.9835580 |
| H | 0.4473860  | -2.7522220 | 0.8899920  |
| H | 0.5332630  | -2.8106540 | -0.8508270 |
| C | -1.9187330 | 0.9005490  | -0.0884910 |
| C | -3.1082560 | -1.2526540 | -0.3880280 |
| C | -3.1005540 | 0.0649270  | 0.4015010  |
| H | -2.1515270 | 1.3050870  | -1.0853800 |
| H | -1.7841190 | 1.7741300  | 0.5656400  |
| H | -3.2723630 | -1.0075860 | -1.4485860 |
| H | -3.9370380 | -1.8946540 | -0.0726580 |
| H | -2.9774340 | -0.1641510 | 1.4658500  |

|   |            |            |            |
|---|------------|------------|------------|
| C | -0.6916460 | -1.2530110 | -0.0949410 |
| C | 1.8675730  | 0.0249840  | -0.0175630 |
| C | 1.8337400  | -1.3651170 | 0.0378690  |
| C | 3.1143170  | 0.6812200  | 0.0078830  |
| C | 3.0310370  | -2.0895090 | 0.1188640  |
| H | 2.9948230  | -3.1770200 | 0.1610480  |
| C | 4.2478880  | -1.4315060 | 0.1437470  |
| H | 5.1746890  | -1.9989340 | 0.2068230  |
| C | 4.3022150  | -0.0387470 | 0.0883070  |
| H | 5.2622850  | 0.4680750  | 0.1086100  |
| C | -4.4109650 | 0.7828300  | 0.2725770  |
| O | -5.1831180 | 0.9983160  | 1.1727530  |
| O | -4.6582390 | 1.1578540  | -0.9870320 |
| H | -5.5201710 | 1.6000980  | -1.0009030 |
| O | 3.0548150  | 2.0304260  | -0.0491760 |
| C | 4.2536920  | 2.7615040  | -0.0290390 |
| H | 4.8941990  | 2.5104000  | -0.8862820 |
| H | 3.9798890  | 3.8179390  | -0.0845740 |
| H | 4.8189280  | 2.5847330  | 0.8969250  |
| N | -1.8724450 | -1.9704150 | -0.2242070 |
| H | -1.9241400 | -2.8101730 | 0.3366910  |

Electronic Energy (RPW6B95D3/def2-SVP)= -862.756482340 (Hartree/Particle)

Dipole Moment= 1.8950 (Debye)

Number of imaginary frequencies 0

THERMOCHEMICAL DATA (Temperature 298.150 Kelvin. Pressure 1.00000 Atm)

Zero-point correction= 0.301594 (Hartree/Particle)

Sum of electronic and zero-point Energies= -862.454888

Sum of electronic and thermal Energies= -862.438198

Sum of electronic and thermal Enthalpies= -862.437254

Sum of electronic and thermal Free Energies= -862.500028

Electronic Energy SP (RPW6B95D3/def2-QZVPP)= -863.762327183 (Hartree/Particle)

Corrected Free Energy= -863.505872843 (Hartree/Particle)

-----  
CONFORMER 11

CARTESIAN COORDINATES

|   |            |            |            |
|---|------------|------------|------------|
| C | 0.5508070  | -0.9262550 | -0.5428630 |
| C | -0.8221700 | -0.3532720 | -0.6759780 |
| C | -0.0415270 | 1.9536000  | -0.1097220 |
| H | 0.8521920  | -1.4238660 | -1.4810110 |
| H | 0.5410400  | -1.7497140 | 0.1907750  |
| H | -0.0222340 | 2.7672950  | -0.8501710 |
| H | -0.3670880 | 2.4357500  | 0.8270150  |
| C | -1.9336410 | -1.3180790 | -0.9715640 |
| C | -3.4077400 | 0.6540600  | -1.1721710 |
| C | -3.2779490 | -0.7285550 | -0.5462280 |
| H | -1.7279490 | -2.2749540 | -0.4674420 |
| H | -1.9820910 | -1.5768830 | -2.0397320 |
| H | -4.3544880 | 1.1193050  | -0.8862480 |
| H | -3.4127510 | 0.5360760  | -2.2649750 |
| H | -4.0966110 | -1.3734850 | -0.8957660 |
| C | -1.0806170 | 0.9601250  | -0.5211990 |
| C | 1.6120810  | 0.0534500  | -0.1485180 |
| C | 1.3428400  | 1.4011920  | 0.0682270  |
| C | 2.9300860  | -0.4169440 | 0.0168170  |
| C | 2.3774450  | 2.2675120  | 0.4472710  |
| H | 2.1570920  | 3.3206800  | 0.6145360  |
| C | 3.6665780  | 1.7916280  | 0.6069700  |
| H | 4.4664540  | 2.4685280  | 0.9017300  |
| C | 3.9565680  | 0.4441080  | 0.3928500  |

|   |            |            |            |
|---|------------|------------|------------|
| H | 4.9717250  | 0.0807390  | 0.5207940  |
| C | -3.4171170 | -0.6205890 | 0.9620110  |
| O | -3.7832380 | 0.3725600  | 1.5334150  |
| O | -3.1330120 | -1.7191310 | 1.6686530  |
| H | -2.8654790 | -2.4416020 | 1.0876520  |
| O | 3.1021970  | -1.7377490 | -0.2131480 |
| C | 4.3862380  | -2.2878900 | -0.0686840 |
| H | 5.1031810  | -1.8277030 | -0.7632190 |
| H | 4.7632840  | -2.1693450 | 0.9569430  |
| H | 4.3004910  | -3.3530290 | -0.2972540 |
| N | -2.3246500 | 1.5247550  | -0.7718060 |
| H | -2.5930770 | 2.2189470  | -0.0856520 |

Electronic Energy (RPW6B95D3/def2-SVP)= -862.754663893 (Hartree/Particle)

Dipole Moment= 4.5494 (Debye)

Number of imaginary frequencies 0

THERMOCHEMICAL DATA (Temperature 298.150 Kelvin. Pressure 1.00000 Atm)

Zero-point correction= 0.301536 (Hartree/Particle)

Sum of electronic and zero-point Energies= -862.453128

Sum of electronic and thermal Energies= -862.436639

Sum of electronic and thermal Enthalpies= -862.435694

Sum of electronic and thermal Free Energies= -862.498169

Electronic Energy SP (RPW6B95D3/def2-QZVPP)= -863.759752889 (Hartree/Particle)

Corrected Free Energy= -863.503257996 (Hartree/Particle)

-----

CONFORMERS of IMINE TRANS-2

CONFORMER 1

CARTESIAN COORDINATES

|   |               |               |               |
|---|---------------|---------------|---------------|
| C | 0.6624085239  | 0.7286708891  | 0.7221728626  |
| C | -0.5436342673 | 0.1754250845  | -0.0353911300 |
| C | 0.5842930697  | -2.0782478583 | 0.4813371395  |
| H | 0.4991895039  | 0.6067982758  | 1.8047428313  |
| H | 0.7586578686  | 1.8025802898  | 0.5385319145  |
| H | 0.5971606163  | -2.2639986448 | 1.5682689885  |
| H | 0.5209454134  | -3.0661354877 | 0.0136844785  |
| H | -0.3181067690 | 0.2910897412  | -1.1088680238 |
| C | -1.8458063140 | 0.8940954837  | 0.2616222809  |
| C | -3.0493197556 | -1.2846619604 | 0.0520289809  |
| C | -2.9740031589 | 0.1662052648  | -0.4403596145 |
| H | -1.7959430710 | 1.9397225650  | -0.0612035227 |
| H | -2.0317360876 | 0.9039163249  | 1.3451108232  |
| H | -3.6622817084 | -1.8784566561 | -0.6375440297 |
| H | -3.5785944116 | -1.3228193397 | 1.0174741492  |
| C | -0.6896232952 | -1.3111601685 | 0.2034293978  |
| N | -1.7848493472 | -1.9514495921 | 0.2342688659  |
| C | 1.9079013678  | 0.0151741888  | 0.2901068578  |
| C | 1.8532121483  | -1.3677147924 | 0.1106371805  |
| C | 3.1012726223  | 0.7012696658  | 0.0108029474  |
| C | 2.9734042334  | -2.0632204102 | -0.3503272257 |
| H | 2.9200968185  | -3.1413362812 | -0.4910558534 |
| C | 4.1466204162  | -1.3753796248 | -0.6224184009 |
| H | 5.0226344941  | -1.9123825070 | -0.9817417774 |
| C | 4.2216434750  | 0.0040132725  | -0.4437531404 |
| H | 5.1483805514  | 0.5254798722  | -0.6633354374 |
| C | -4.2971480945 | 0.8617109482  | -0.2812643555 |
| O | -4.4732088747 | 1.9002855832  | 0.3030345057  |
| O | -5.2889345171 | 0.1859785193  | -0.8658360843 |

|   |               |              |               |
|---|---------------|--------------|---------------|
| H | -6.1115050098 | 0.6767019608 | -0.7194526261 |
| H | -2.7685374841 | 0.1428899400 | -1.5217263695 |
| C | 3.0816559894  | 2.0378297145 | 0.2082745239  |
| O | 4.2370915475  | 2.7835900802 | -0.0772121845 |
| H | 5.0845838230  | 2.4716741762 | 0.5492405789  |
| H | 4.5264555806  | 2.6923956539 | -1.1336925466 |
| H | 3.9988164798  | 3.8278225539 | 0.1392192006  |

Electronic Energy (RPW6B95D3/def2-SVP)= -862.755447425 (Hartree/Particle)

Dipole Moment= 2.5720 (Debye)

Number of imaginary frequencies 0

THERMOCHEMICAL DATA (Temperature 298.150 Kelvin. Pressure 1.00000 Atm)

Zero-point correction= 0.301307 (Hartree/Particle)

Sum of electronic and zero-point Energies= -862.454140

Sum of electronic and thermal Energies= -862.437733

Sum of electronic and thermal Enthalpies= -862.436789

Sum of electronic and thermal Free Energies= -862.499205

Electronic Energy SP (RPW6B95D3/def2-QZVPP)= -863.761827821 (Hartree/Particle)

Corrected Free Energy= -863.505585396 (Hartree/Particle)

-----  
CONFORMER 2

CARTESIAN COORDINATES

|   |               |               |               |
|---|---------------|---------------|---------------|
| C | 0.6444535054  | 0.7070888228  | 0.7109000375  |
| C | -0.5557192142 | 0.1425715223  | -0.0481836120 |
| C | 0.5949266222  | -2.1012860043 | 0.4620204217  |
| H | 0.4821618932  | 0.5814162959  | 1.7930834338  |
| H | 0.7303526478  | 1.7821901360  | 0.5291114459  |
| H | 0.6114002351  | -2.2952074349 | 1.5474009110  |
| H | 0.5402199019  | -3.0862129719 | -0.0130041511 |
| H | -0.3326981438 | 0.2631775677  | -1.1214396987 |
| C | -1.8634672597 | 0.8482338907  | 0.2540523765  |
| C | -3.0464010141 | -1.3331715443 | 0.0532299226  |
| C | -2.9900570818 | 0.1118734567  | -0.4615717318 |
| H | -1.8121892691 | 1.8962518644  | -0.0639664390 |
| H | -2.0520003265 | 0.8445825151  | 1.3363410932  |
| H | -3.6591392820 | -1.9441286574 | -0.6231312446 |
| H | -3.5658322876 | -1.3520660194 | 1.0233661435  |
| C | -0.6865435419 | -1.3445950256 | 0.1911573273  |
| N | -1.7769844866 | -1.9920543582 | 0.2302513895  |
| C | 1.8966899521  | 0.0067913167  | 0.2768936047  |
| C | 1.8561689635  | -1.3761609708 | 0.0936721356  |
| C | 3.0828360575  | 0.7059997557  | -0.0007393388 |
| C | 2.9835136094  | -2.0585707247 | -0.3695083195 |
| H | 2.9413556446  | -3.1367500599 | -0.5134408606 |
| C | 4.1495207980  | -1.3578668316 | -0.6396957826 |
| H | 5.0309636453  | -1.8848479732 | -1.0005599739 |
| C | 4.2103227479  | 0.0216919323  | -0.4571860199 |
| H | 5.1315748485  | 0.5534915055  | -0.6750876005 |
| C | -4.3258639446 | 0.7812595687  | -0.3017793159 |
| O | -5.0655769197 | 1.0843837086  | -1.2029869374 |
| O | -4.6297749421 | 1.0000417010  | 0.9810394438  |
| H | -5.5039440875 | 1.4166594261  | 1.0128093651  |
| H | -2.7873158959 | 0.1029101881  | -1.5386864314 |
| O | 3.0494473231  | 2.0416856624  | 0.2003926766  |
| C | 4.1954929260  | 2.8006536843  | -0.0885262125 |
| H | 4.4838571372  | 2.7109653970  | -1.1453771412 |
| H | 3.9452369911  | 3.8423317664  | 0.1266368313  |
| H | 5.0477746922  | 2.4999296504  | 0.5368797359  |

Electronic Energy (RPW6B95D3/def2-SVP)= -862.753984482 (Hartree/Particle)  
Dipole Moment= 4.1018 (Debye)  
Number of imaginary frequencies 0

THERMOCHEMICAL DATA (Temperature 298.150 Kelvin. Pressure 1.00000 Atm)

Zero-point correction= 0.301621 (Hartree/Particle)  
Sum of electronic and zero-point Energies= -862.452364  
Sum of electronic and thermal Energies= -862.435953  
Sum of electronic and thermal Enthalpies= -862.435009  
Sum of electronic and thermal Free Energies= -862.497638

Electronic Energy SP (RPW6B95D3/def2-QZVPP)= -863.760960586 (Hartree/Particle)  
Corrected Free Energy= -863.504614104 (Hartree/Particle)

-----  
CONFORMER 3

CARTESIAN COORDINATES

|   |               |               |               |
|---|---------------|---------------|---------------|
| C | 0.7949470813  | 0.3787992308  | -1.5518237320 |
| C | -0.6310648074 | -0.1551012903 | -1.3246175220 |
| C | 0.6646147574  | -2.2851373911 | -0.8380539602 |
| H | 0.7819742115  | 1.4718274911  | -1.5856399854 |
| H | 1.1437266710  | 0.0445432655  | -2.5397321751 |
| H | 0.5755582248  | -3.2740713684 | -0.3818029048 |
| H | 0.8782801830  | -2.4073082517 | -1.9115570647 |
| H | -1.0908306286 | -0.2979250468 | -2.3148977587 |
| C | -1.5213451090 | 0.7845884671  | -0.5296639600 |
| C | -2.6978449311 | -1.2157008096 | 0.4185433035  |
| C | -2.8659793125 | 0.1138581709  | -0.3313662877 |
| H | -1.6408109542 | 1.7413543627  | -1.0496632018 |
| H | -1.0627664132 | 1.0040575560  | 0.4453609787  |
| H | -3.5838818761 | -1.8443451792 | 0.2645976591  |
| H | -2.6622805230 | -1.0285002723 | 1.5033759819  |
| C | -0.6166229084 | -1.5166069785 | -0.6598710823 |
| N | -1.5222534760 | -1.9851468255 | 0.0953006839  |
| C | 1.7716913178  | -0.1065727652 | -0.5225858844 |
| C | 1.7442987437  | -1.4617157990 | -0.1866651969 |
| C | 2.7184367721  | 0.7342751632  | 0.0824718153  |
| C | 2.6387637338  | -1.9814693905 | 0.7488218523  |
| H | 2.5990069088  | -3.0369282983 | 1.0110670381  |
| C | 3.5720246372  | -1.1399311664 | 1.3385392643  |
| H | 4.2771283498  | -1.5347091162 | 2.0678331356  |
| C | 3.6186370469  | 0.2140599592  | 1.0149786252  |
| H | 4.3553708882  | 0.8544485777  | 1.4905338330  |
| C | -3.8593553044 | 1.0018914534  | 0.3648565638  |
| O | -3.6582612583 | 2.1380338187  | 0.7106199011  |
| O | -5.0220042737 | 0.3796670673  | 0.5730057727  |
| H | -5.6127769684 | 0.9958422922  | 1.0314514482  |
| H | -3.2983594794 | -0.1085648397 | -1.3191127310 |
| O | 2.6954666591  | 2.0312450295  | -0.2943792020 |
| C | 3.5976931857  | 2.9281919303  | 0.3010449514  |
| H | 4.6405515020  | 2.6526674749  | 0.0900753925  |
| H | 3.3943795073  | 3.9112802515  | -0.1304828872 |
| H | 3.4586628496  | 2.9778222728  | 1.3902133401  |

Electronic Energy (RPW6B95D3/def2-SVP)= -862.753817507 (Hartree/Particle)  
Dipole Moment= 1.7761 (Debye)  
Number of imaginary frequencies 0

THERMOCHEMICAL DATA (Temperature 298.150 Kelvin. Pressure 1.00000 Atm)

Zero-point correction= 0.301831 (Hartree/Particle)



Sum of electronic and zero-point Energies= -862.451986  
Sum of electronic and thermal Energies= -862.435770  
Sum of electronic and thermal Enthalpies= -862.434826  
Sum of electronic and thermal Free Energies= -862.496851

Electronic Energy SP (RPW6B95D3/def2-QZVPP)= -863.760302357 (Hartree/Particle)  
Corrected Free Energy= -863.503335850 (Hartree/Particle)

-----  
CONFORMER 4

CARTESIAN COORDINATES

|   |               |               |               |
|---|---------------|---------------|---------------|
| C | 0.7252413943  | 0.2709116889  | -1.5642695972 |
| C | -0.6784688041 | -0.2916009192 | -1.2784654099 |
| C | 0.6945469565  | -2.3563055265 | -0.7224282547 |
| H | 0.6793960889  | 1.3597539262  | -1.6559686177 |
| H | 1.0629372572  | -0.1063641772 | -2.5404650076 |
| H | 0.6450749765  | -3.3251215300 | -0.2194587481 |
| H | 0.8968341331  | -2.5222778921 | -1.7923371433 |
| H | -1.1630392490 | -0.4824572247 | -2.2485960838 |
| C | -1.5699447698 | 0.6559120090  | -0.4945454397 |
| C | -2.6912615030 | -1.3452239865 | 0.5254172718  |
| C | -2.9037959144 | -0.0426197753 | -0.2386523882 |
| H | -1.7273970709 | 1.5868294435  | -1.0491676459 |
| H | -1.0888246517 | 0.9161600245  | 0.4598676599  |
| H | -3.5537972677 | -2.0103413348 | 0.3836026315  |
| H | -2.6782037464 | -1.1287690012 | 1.6032843926  |
| C | -0.6102390045 | -1.6242098287 | -0.5603412917 |
| N | -1.4921657034 | -2.0893942486 | 0.2235553706  |
| C | 1.7350711334  | -0.1315847902 | -0.5312284053 |
| C | 1.7562089473  | -1.4686798304 | -0.1287661347 |
| C | 2.6637681808  | 0.7676861577  | 0.0145594052  |
| C | 2.6811544643  | -1.9125388685 | 0.8161365137  |
| H | 2.6795616526  | -2.9542800792 | 1.1310020515  |
| C | 3.5954027261  | -1.0134649722 | 1.3480326779  |
| H | 4.3233988613  | -1.3488321854 | 2.0845553081  |
| C | 3.5940693362  | 0.3233517821  | 0.9567682857  |
| H | 4.3168967415  | 1.0093943506  | 1.3879172217  |
| C | -3.8905677616 | 0.8500563549  | 0.4669487308  |
| O | -4.4249565235 | 0.6091470796  | 1.5197750970  |
| O | -4.1236089486 | 1.9720298717  | -0.2161192872 |
| H | -4.7585152613 | 2.5016177191  | 0.2890746256  |
| H | -3.3467959400 | -0.2541946365 | -1.2234865680 |
| O | 2.5939229185  | 2.0425443331  | -0.4266856421 |
| C | 3.4822622719  | 2.9941143113  | 0.1009900515  |
| H | 3.3610941409  | 3.1011387667  | 1.1881550611  |
| H | 4.5281531669  | 2.7336153478  | -0.1140584352 |
| H | 3.2454806262  | 3.9460334784  | -0.3804839389 |

Electronic Energy (RPW6B95D3/def2-SVP)= -862.753753135 (Hartree/Particle)

Dipole Moment= 5.0151 (Debye)  
Number of imaginary frequencies 0

THERMOCHEMICAL DATA (Temperature 298.150 Kelvin. Pressure 1.00000 Atm)

Zero-point correction= 0.302063 (Hartree/Particle)  
Sum of electronic and zero-point Energies= -862.451690  
Sum of electronic and thermal Energies= -862.435552  
Sum of electronic and thermal Enthalpies= -862.434607  
Sum of electronic and thermal Free Energies= -862.496547

Electronic Energy SP (RPW6B95D3/def2-QZVPP)= -863.759893025 (Hartree/Particle)  
Corrected Free Energy= -863.502686890 (Hartree/Particle)

CONFORMER 5

CARTESIAN COORDINATES

|   |               |               |               |
|---|---------------|---------------|---------------|
| C | 0.7358422269  | 0.3344894678  | -1.5767662616 |
| C | -0.6791281768 | -0.2068930222 | -1.3035941525 |
| C | 0.6478459664  | -2.3190730131 | -0.8189940603 |
| H | 0.7136753607  | 1.4266911055  | -1.6286150424 |
| H | 1.0600448808  | -0.0139867227 | -2.5680738767 |
| H | 0.5783033337  | -3.3010748662 | -0.3446793989 |
| H | 0.8353846560  | -2.4574523410 | -1.8953813594 |
| H | -1.1669162699 | -0.3628809504 | -2.2781252477 |
| C | -1.5504335972 | 0.7363872751  | -0.4923395997 |
| C | -2.6902085812 | -1.2533043992 | 0.5036009504  |
| C | -2.8990655407 | 0.0616421758  | -0.2640448173 |
| H | -1.6759742338 | 1.6885939086  | -1.0211326923 |
| H | -1.0725648061 | 0.9560621874  | 0.4725034687  |
| H | -3.5712069044 | -1.8976841015 | 0.3826711873  |
| H | -2.6271481280 | -1.0367124201 | 1.5805020019  |
| C | -0.6350839988 | -1.5583615029 | -0.6213470436 |
| N | -1.5172966325 | -2.0201926314 | 0.1645079369  |
| C | 1.7431026739  | -0.1267081998 | -0.5660715133 |
| C | 1.7371227464  | -1.4768085387 | -0.2089949693 |
| C | 2.6971442886  | 0.7320959762  | 0.0006173430  |
| C | 2.6620741473  | -1.9740069873 | 0.7091598558  |
| H | 2.6396580250  | -3.0256768514 | 0.9881223971  |
| C | 3.6032085173  | -1.1150939252 | 1.2599233838  |
| H | 4.3320264732  | -1.4925060913 | 1.9749625397  |
| C | 3.6277214662  | 0.2342765050  | 0.9155047737  |
| H | 4.3710282928  | 0.8882975001  | 1.3613582306  |
| C | -3.8797276140 | 0.9422028785  | 0.4586220061  |
| O | -4.9878224950 | 1.2144410719  | 0.0723008912  |
| O | -3.3903960359 | 1.3981887715  | 1.6154925232  |
| H | -4.0733184392 | 1.9440515868  | 2.0330398656  |
| H | -3.3549866583 | -0.1541437104 | -1.2369741720 |
| O | 2.6510784333  | 2.0231943937  | -0.3937456920 |
| C | 3.5588637255  | 2.9374978137  | 0.1658788326  |
| H | 4.5987410679  | 2.6700255034  | -0.0687111980 |
| H | 3.3337701857  | 3.9125109590  | -0.2730653135 |
| H | 3.4477476468  | 3.0003228779  | 1.2575734815  |

Electronic Energy (RPW6B95D3/def2-SVP)= -862.752336192 (Hartree/Particle)

Dipole Moment= 4.2321 (Debye)

Number of imaginary frequencies 0

THERMOCHEMICAL DATA (Temperature 298.150 Kelvin. Pressure 1.00000 Atm)

Zero-point correction= 0.302040 (Hartree/Particle)

Sum of electronic and zero-point Energies= -862.450296

Sum of electronic and thermal Energies= -862.434067

Sum of electronic and thermal Enthalpies= -862.433123

Sum of electronic and thermal Free Energies= -862.495325

Electronic Energy SP (RPW6B95D3/def2-QZVPP)= -863.759406635 (Hartree/Particle)

Corrected Free Energy= -863.502395443 (Hartree/Particle)

-----  
CONFORMER 6

CARTESIAN COORDINATES

|   |               |               |               |
|---|---------------|---------------|---------------|
| C | 0.8781762388  | 0.0470429279  | -1.8221410060 |
| C | -0.6197882054 | -0.2347403043 | -1.7014974125 |
| C | 0.2935526791  | -2.2599575835 | -0.4259518983 |
| H | 1.0479699065  | 1.0572485337  | -2.2046908237 |
| H | 1.3158641698  | -0.6467608538 | -2.5550145126 |

|   |               |               |               |
|---|---------------|---------------|---------------|
| H | -0.0270854666 | -3.0504431864 | 0.2575691327  |
| H | 0.7665128801  | -2.7370959104 | -1.3002221439 |
| H | -1.0316996035 | -0.4250181609 | -2.7048462205 |
| C | -1.3951250186 | 0.9540536047  | -1.1028908629 |
| C | -3.1032507272 | -0.8896473358 | -1.0085548414 |
| C | -2.7337957326 | 0.5213889732  | -0.5110845939 |
| H | -1.5480024358 | 1.7028979386  | -1.8866418839 |
| H | -0.7842350572 | 1.4129383267  | -0.3178173566 |
| H | -3.1906931361 | -0.8603876278 | -2.1064544096 |
| H | -4.0758313595 | -1.1919842210 | -0.6084890165 |
| C | -0.8977111520 | -1.4776753332 | -0.8972787419 |
| N | -2.0820600678 | -1.8223966775 | -0.5816655605 |
| C | 1.5568667475  | -0.1436124876 | -0.4978414012 |
| C | 1.2715932734  | -1.3111087830 | 0.2134632399  |
| C | 2.4369883151  | 0.8006469709  | 0.0509750751  |
| C | 1.8527098220  | -1.5441473566 | 1.4599130621  |
| H | 1.6164592494  | -2.4540362961 | 2.0082780574  |
| C | 2.7287917361  | -0.6060615309 | 1.9884796548  |
| H | 3.1899302040  | -0.7786334480 | 2.9592790750  |
| C | 3.0249579911  | 0.5652538029  | 1.2958353017  |
| H | 3.7081677396  | 1.2873536394  | 1.7324579297  |
| C | -2.6982445305 | 0.4969507315  | 1.0015655913  |
| O | -1.7310590400 | 0.7079122928  | 1.6880922888  |
| O | -3.8912222537 | 0.1970909422  | 1.5181977403  |
| H | -3.7997412361 | 0.1738155271  | 2.4823289137  |
| H | -3.5400845782 | 1.2093904252  | -0.7936727542 |
| O | 2.6625391331  | 1.9110260286  | -0.6847891570 |
| C | 3.5110366448  | 2.9047153263  | -0.1690311025 |
| H | 3.5422094845  | 3.7074751617  | -0.9096404400 |
| H | 3.1316481785  | 3.3063890453  | 0.7811309524  |
| H | 4.5294339386  | 2.5234333159  | -0.0093887077 |

Electronic Energy (RPW6B95D3/def2-SVP)= -862.755900337 (Hartree/Particle)

Dipole Moment= 3.0349 (Debye)

Number of imaginary frequencies 0

THERMOCHEMICAL DATA (Temperature 298.150 Kelvin. Pressure 1.00000 Atm)

Zero-point correction= 0.302487 (Hartree/Particle)

Sum of electronic and zero-point Energies= -862.453414

Sum of electronic and thermal Energies= -862.437557

Sum of electronic and thermal Enthalpies= -862.436613

Sum of electronic and thermal Free Energies= -862.497379

Electronic Energy SP (RPW6B95D3/def2-QZVPP)= -863.761541013 (Hartree/Particle)

Corrected Free Energy= -863.503019676 (Hartree/Particle)

-----  
CONFORMER 7

CARTESIAN COORDINATES

|   |               |               |               |
|---|---------------|---------------|---------------|
| C | 0.5457075350  | 1.1045935187  | 0.3174725435  |
| C | -0.6097741417 | 0.5597101272  | -0.5184531877 |
| C | 0.0832428634  | -1.6118890024 | 0.6640966144  |
| H | 0.2037011021  | 1.2015104935  | 1.3603546372  |
| H | 0.8198193842  | 2.1089832314  | -0.0166628141 |
| H | -0.1922418176 | -1.3442319497 | 1.6988571510  |
| H | -0.0522773671 | -2.6923852011 | 0.5641071801  |
| H | -0.2977133709 | 0.5795976082  | -1.5759701861 |
| C | -1.8944560586 | 1.3989550772  | -0.4043046675 |
| C | -2.7578707664 | -0.6743072077 | -1.5307935296 |
| C | -3.1410261249 | 0.5807627173  | -0.7255953561 |
| H | -1.8198566023 | 2.2541727242  | -1.0835415722 |
| H | -1.9740389692 | 1.7927471433  | 0.6143003206  |
| H | -2.2711847550 | -0.3527463335 | -2.4658810411 |

|   |               |               |               |
|---|---------------|---------------|---------------|
| H | -3.6542253538 | -1.2393579565 | -1.8053269122 |
| C | -0.8812147615 | -0.8947482487 | -0.2360304634 |
| N | -1.8737274819 | -1.5084772857 | -0.7447761608 |
| C | 1.7288344150  | 0.1853536694  | 0.2603254850  |
| C | 1.5018813275  | -1.1833654214 | 0.4163706501  |
| C | 3.0362435918  | 0.6470315966  | 0.0420363736  |
| C | 2.5600808462  | -2.0903666200 | 0.3493895165  |
| H | 2.3702800609  | -3.1556554413 | 0.4664608522  |
| C | 3.8485139308  | -1.6216719209 | 0.1339107586  |
| H | 4.6808484916  | -2.3211628481 | 0.0808465233  |
| C | 4.0964058417  | -0.2597472900 | -0.0198711856 |
| H | 5.1119854217  | 0.0855886928  | -0.1885779287 |
| C | -3.8527370055 | 0.1313584239  | 0.5306586655  |
| O | -3.4439223490 | 0.2661633218  | 1.6562304878  |
| O | -5.0121673667 | -0.4672209816 | 0.2552570313  |
| H | -5.4038140193 | -0.7570430104 | 1.0926573954  |
| H | -3.8642625087 | 1.1622680184  | -1.3099178644 |
| O | 3.1846548914  | 1.9827008628  | -0.0948505732 |
| C | 4.4670521919  | 2.5027586346  | -0.3355515451 |
| H | 4.3559439071  | 3.5864747610  | -0.4205883708 |
| H | 5.1565018930  | 2.2763196167  | 0.4899015106  |
| H | 4.8936111694  | 2.1108341886  | -1.2696795618 |

Electronic Energy (RPW6B95D3/def2-SVP)= -862.755313528 (Hartree/Particle)

Dipole Moment= 3.4235 (Debye)

Number of imaginary frequencies 0

THERMOCHEMICAL DATA (Temperature 298.150 Kelvin. Pressure 1.00000 Atm)

Zero-point correction= 0.302063 (Hartree/Particle)

Sum of electronic and zero-point Energies= -862.453250

Sum of electronic and thermal Energies= -862.437190

Sum of electronic and thermal Enthalpies= -862.436246

Sum of electronic and thermal Free Energies= -862.497927

Electronic Energy SP (RPW6B95D3/def2-QZVPP)= -863.761090124 (Hartree/Particle)

Corrected Free Energy= -863.503703596 (Hartree/Particle)

-----  
CONFORMER 8

CARTESIAN COORDINATES

|   |               |               |               |
|---|---------------|---------------|---------------|
| C | 0.1033920667  | 0.5206625813  | -0.7246463124 |
| C | -0.8567043375 | -0.5606413274 | -1.2280665299 |
| C | 0.4126475599  | -2.3449140969 | 0.0115692250  |
| H | -0.3718187169 | 1.1255486730  | 0.0605600547  |
| H | 0.3106522131  | 1.2274622175  | -1.5373945271 |
| H | 0.3380697333  | -2.9814414590 | 0.8998256910  |
| H | 0.6147868728  | -3.0181996266 | -0.8375334053 |
| H | -0.3922568118 | -0.9917850791 | -2.1276657618 |
| C | -2.2392280328 | -0.0343597879 | -1.5972336763 |
| C | -3.2284831670 | -1.4948711388 | 0.1680369444  |
| C | -3.1917193020 | -0.0869922620 | -0.4024907808 |
| H | -2.6696293366 | -0.6585849891 | -2.3886923542 |
| H | -2.1702446367 | 0.9846340849  | -1.9939870375 |
| H | -3.8017359973 | -2.1453033151 | -0.5086681454 |
| H | -3.7707138701 | -1.4936156381 | 1.1207410630  |
| C | -0.9134255034 | -1.6858623417 | -0.2251162604 |
| N | -1.9384247931 | -2.1088644018 | 0.3924123124  |
| C | 1.3994887870  | -0.0297932637 | -0.2024632474 |
| C | 1.5572067139  | -1.3716690237 | 0.1446369176  |
| C | 2.4875308997  | 0.8504977015  | -0.0401524079 |
| C | 2.7903719683  | -1.8278504460 | 0.6272204768  |
| H | 2.9028171932  | -2.8766761694 | 0.8966814479  |
| C | 3.8540049225  | -0.9534189152 | 0.7666625563  |

|   |               |               |               |
|---|---------------|---------------|---------------|
| H | 4.8102909319  | -1.3124206475 | 1.1427385181  |
| C | 3.7132168090  | 0.3936939437  | 0.4359358097  |
| H | 4.5527931424  | 1.0715681946  | 0.5563362752  |
| C | -2.8399193923 | 0.9225279120  | 0.6650972219  |
| O | -2.6352307799 | 0.6732862738  | 1.8254642400  |
| O | -2.7921985930 | 2.1657514611  | 0.1791372171  |
| H | -2.5742040824 | 2.7626129087  | 0.9107041882  |
| H | -4.1962149265 | 0.1953864752  | -0.7473092392 |
| O | 2.2430392084  | 2.1368250636  | -0.3734552435 |
| C | 3.2800893627  | 3.0771478144  | -0.2557988207 |
| H | 4.1349316229  | 2.8171697110  | -0.8957308118 |
| H | 2.8714896144  | 4.0381374606  | -0.5775524152 |
| H | 3.6295798841  | 3.1643030680  | 0.7824840865  |

Electronic Energy (RPW6B95D3/def2-SVP)= -862.755843730 (Hartree/Particle)

Dipole Moment= 5.0178 (Debye)

Number of imaginary frequencies 0

THERMOCHEMICAL DATA (Temperature 298.150 Kelvin. Pressure 1.00000 Atm)

Zero-point correction= 0.302063 (Hartree/Particle)

Sum of electronic and zero-point Energies= -862.453780

Sum of electronic and thermal Energies= -862.437694

Sum of electronic and thermal Enthalpies= -862.436750

Sum of electronic and thermal Free Energies= -862.497931

Electronic Energy SP (RPW6B95D3/def2-QZVPP)= -863.760945244 (Hartree/Particle)

Corrected Free Energy= -863.503032514 (Hartree/Particle)

-----  
CONFORMER 9

CARTESIAN COORDINATES

|   |               |               |               |
|---|---------------|---------------|---------------|
| C | 0.7759806828  | 0.0806954291  | -1.8658694431 |
| C | -0.7195098743 | -0.1907761383 | -1.6945045652 |
| C | 0.2268584157  | -2.2623749481 | -0.5247553025 |
| H | 0.9414109769  | 1.0992092602  | -2.2277259100 |
| H | 1.1779713769  | -0.5971143558 | -2.6332389190 |
| H | -0.0696856389 | -3.0761095250 | 0.1420700637  |
| H | 0.6559508531  | -2.7080128852 | -1.4372513693 |
| H | -1.1671515381 | -0.3652669324 | -2.6852699072 |
| C | -1.4677452445 | 0.9992442994  | -1.0603200830 |
| C | -3.1782049807 | -0.8285046883 | -0.8716336323 |
| C | -2.7534039720 | 0.5617416655  | -0.3604983383 |
| H | -1.7059145985 | 1.7177512196  | -1.8515249536 |
| H | -0.8031712747 | 1.5054921564  | -0.3536193460 |
| H | -3.3431818647 | -0.7695511157 | -1.9594662710 |
| H | -4.1249397695 | -1.1229444862 | -0.4072754393 |
| C | -0.9765483562 | -1.4506064113 | -0.9086501329 |
| N | -2.1468396040 | -1.7887036717 | -0.5391490978 |
| C | 1.5022268202  | -0.1536851584 | -0.5742624178 |
| C | 1.2380156303  | -1.3435516454 | 0.1069700646  |
| C | 2.4019371086  | 0.7707624315  | -0.0240272971 |
| C | 1.8600511762  | -1.6194115770 | 1.3242057051  |
| H | 1.6394131634  | -2.5463014611 | 1.8501849710  |
| C | 2.7556854586  | -0.7006109644 | 1.8543109399  |
| H | 3.2488226957  | -0.9061424940 | 2.8027415481  |
| C | 3.0308125482  | 0.4932134390  | 1.1920454341  |
| H | 3.7297675170  | 1.2003436899  | 1.6284056465  |
| C | -2.6711922410 | 0.4550627335  | 1.1476428146  |
| O | -3.6312891174 | 0.2624925231  | 1.8506945482  |
| O | -1.4361106663 | 0.5617932033  | 1.6371708543  |
| H | -1.4874624052 | 0.4445576522  | 2.5978957652  |
| H | -3.5695925695 | 1.2662801840  | -0.5571424996 |
| O | 2.6039555654  | 1.9054704723  | -0.7291220776 |

|   |              |              |               |
|---|--------------|--------------|---------------|
| C | 3.4739268044 | 2.8792086488 | -0.2113744599 |
| H | 3.4804980023 | 3.7066625022 | -0.9249728968 |
| H | 3.1310304028 | 3.2491328589 | 0.7651946671  |
| H | 4.4963474476 | 2.4908491225 | -0.1025161730 |

Electronic Energy (RPW6B95D3/def2-SVP)= -862.754099765 (Hartree/Particle)

Dipole Moment= 5.4463 (Debye)

Number of imaginary frequencies 0

THERMOCHEMICAL DATA (Temperature 298.150 Kelvin. Pressure 1.00000 Atm)

Zero-point correction= 0.302554 (Hartree/Particle)

Sum of electronic and zero-point Energies= -862.451546

Sum of electronic and thermal Energies= -862.435718

Sum of electronic and thermal Enthalpies= -862.434774

Sum of electronic and thermal Free Energies= -862.495365

Electronic Energy SP (RPW6B95D3/def2-QZVPP)= -863.759681801 (Hartree/Particle)

Corrected Free Energy= -863.500947036 (Hartree/Particle)

-----  
CONFORMER 10

CARTESIAN COORDINATES

|   |               |               |               |
|---|---------------|---------------|---------------|
| C | 0.4602969016  | 1.0325545969  | 0.2462726663  |
| C | -0.6408650478 | 0.4922515836  | -0.6654437599 |
| C | 0.0489366181  | -1.7026988149 | 0.4745825932  |
| H | 0.0570347971  | 1.0866894461  | 1.2702864468  |
| H | 0.7253527941  | 2.0527098898  | -0.0447585153 |
| H | -0.2432006885 | -1.5118955634 | 1.5220229748  |
| H | -0.0640891220 | -2.7776410024 | 0.3074643990  |
| H | -0.2307989744 | 0.4633630994  | -1.6881652083 |
| C | -1.8974541319 | 1.3865949836  | -0.6917574094 |
| C | -2.9764888189 | -0.7284012561 | -1.4466256021 |
| C | -3.1841062758 | 0.5763086818  | -0.6623556009 |
| H | -1.8871277838 | 1.9911659852  | -1.6045093570 |
| H | -1.8696378964 | 2.0832025463  | 0.1524683497  |
| H | -2.6563352942 | -0.4788657562 | -2.4710021328 |
| H | -3.9207500235 | -1.2780986586 | -1.5249750988 |
| C | -0.9508907553 | -0.9543526906 | -0.3647173289 |
| N | -1.9954735494 | -1.5536717237 | -0.7738570630 |
| C | 1.6658280917  | 0.1435394366  | 0.2073966957  |
| C | 1.4616377653  | -1.2348981282 | 0.2838970751  |
| C | 2.9704926348  | 0.6406717797  | 0.0621857263  |
| C | 2.5402603006  | -2.1172593820 | 0.2107836464  |
| H | 2.3684453116  | -3.1905538652 | 0.2669766167  |
| C | 3.8256104684  | -1.6142716305 | 0.0682329815  |
| H | 4.6737006786  | -2.2942153361 | 0.0106720170  |
| C | 4.0508589905  | -0.2416104536 | -0.0055055861 |
| H | 5.0647031007  | 0.1305405331  | -0.1180589909 |
| C | -3.6514943568 | 0.1909117475  | 0.7236936658  |
| O | -4.7334096557 | -0.2815788644 | 0.9621199738  |
| O | -2.7330747635 | 0.3951350587  | 1.6729025967  |
| H | -3.1029071911 | 0.0906812512  | 2.5156764250  |
| H | -4.0114131236 | 1.1366414404  | -1.1124744281 |
| O | 3.0955856026  | 1.9842840305  | -0.0029436422 |
| C | 4.3745491438  | 2.5405752231  | -0.1690114751 |
| H | 4.8439437032  | 2.2034730829  | -1.1039880421 |
| H | 4.2434986148  | 3.6247959328  | -0.2056477261 |
| H | 5.0375709492  | 2.2874011131  | 0.6702273349  |

Electronic Energy (RPW6B95D3/def2-SVP)= -862.753607597 (Hartree/Particle)

Dipole Moment= 5.6012 (Debye)

Number of imaginary frequencies 0

THERMOCHEMICAL DATA (Temperature 298.150 Kelvin. Pressure 1.00000 Atm)

Zero-point correction= 0.302034 (Hartree/Particle)  
Sum of electronic and zero-point Energies= -862.451574  
Sum of electronic and thermal Energies= -862.435569  
Sum of electronic and thermal Enthalpies= -862.434625  
Sum of electronic and thermal Free Energies= -862.495509

Electronic Energy SP (RPW6B95D3/def2-QZVPP)= -863.758864937 (Hartree/Particle)  
Corrected Free Energy= -863.500766340 (Hartree/Particle)

-----  
CONFORMER 11

CARTESIAN COORDINATES

|   |               |               |               |
|---|---------------|---------------|---------------|
| C | 0.2168615133  | 0.6658855751  | -0.6370662384 |
| C | -0.7596094454 | -0.2982150983 | -1.3185195344 |
| C | 0.3789942939  | -2.2672533025 | -0.2225773838 |
| H | -0.2814034119 | 1.1746597602  | 0.1981648299  |
| H | 0.4784678228  | 1.4657478889  | -1.3403653326 |
| H | 0.2239362312  | -2.9741165603 | 0.6000400788  |
| H | 0.5983210952  | -2.8794847026 | -1.1128764604 |
| H | -0.2654553553 | -0.6336833905 | -2.2433857598 |
| C | -2.0983510520 | 0.3428410034  | -1.6895113255 |
| C | -3.2533175030 | -1.3996883493 | -0.3226700561 |
| C | -3.1734492600 | 0.0887791653  | -0.6409084621 |
| H | -2.4541080980 | -0.0816248146 | -2.6348592617 |
| H | -1.9707978716 | 1.4193641398  | -1.8468040265 |
| H | -3.7018273489 | -1.9209558165 | -1.1814273554 |
| H | -3.9327670350 | -1.5710963747 | 0.5186301809  |
| C | -0.9099849762 | -1.5432144861 | -0.4815080168 |
| N | -1.9896957485 | -2.0358861408 | -0.0289604387 |
| C | 1.4726443889  | 0.0049543922  | -0.1491169871 |
| C | 1.5593697016  | -1.3719942121 | 0.0517602876  |
| C | 2.5944573344  | 0.8080073043  | 0.1390962729  |
| C | 2.7538007672  | -1.9387898605 | 0.5147777996  |
| H | 2.8095948163  | -3.0152857071 | 0.6681118667  |
| C | 3.8507122705  | -1.1379704796 | 0.7801045404  |
| H | 4.7770237448  | -1.5818725911 | 1.1402952065  |
| C | 3.7815525877  | 0.2424564202  | 0.5959622406  |
| H | 4.6466140103  | 0.8616035659  | 0.8133594994  |
| C | -3.0164819729 | 0.9747195270  | 0.5762487137  |
| O | -2.4609534548 | 2.0451089737  | 0.5780680454  |
| O | -3.6183452720 | 0.4870138600  | 1.6603719115  |
| H | -3.5144156567 | 1.1373387894  | 2.3714329414  |
| H | -4.1486141206 | 0.3938473596  | -1.0506404386 |
| O | 2.4227023258  | 2.1339213986  | -0.0572711649 |
| C | 3.4992734784  | 3.0008770123  | 0.1919214338  |
| H | 4.3623073265  | 2.7670846766  | -0.4473074797 |
| H | 3.1492679812  | 4.0108909974  | -0.0347593317 |
| H | 3.8169841818  | 2.9578730125  | 1.2431931628  |

Electronic Energy (RPW6B95D3/def2-SVP)= -862.754462843 (Hartree/Particle)

Dipole Moment= 1.6303 (Debye)  
Number of imaginary frequencies 0

THERMOCHEMICAL DATA (Temperature 298.150 Kelvin. Pressure 1.00000 Atm)

Zero-point correction= 0.301986 (Hartree/Particle)  
Sum of electronic and zero-point Energies= -862.452477  
Sum of electronic and thermal Energies= -862.436309  
Sum of electronic and thermal Enthalpies= -862.435365

Sum of electronic and thermal Free Energies= -862.497502  
Electronic Energy SP (RPW6B95D3/def2-QZVPP)= -863.758992334 (Hartree/Particle)  
Corrected Free Energy= -863.502031491 (Hartree/Particle)

-----  
CONFORMER 12

CARTESIAN COORDINATES

|   |               |               |               |
|---|---------------|---------------|---------------|
| C | 0.1093387432  | 0.6256639837  | -0.6354230752 |
| C | -0.8449178107 | -0.3631225573 | -1.3112107167 |
| C | 0.3725840985  | -2.3172762571 | -0.2983913143 |
| H | -0.3732107635 | 1.0996985573  | 0.2309086856  |
| H | 0.3311454623  | 1.4482501521  | -1.3258601810 |
| H | 0.2741936315  | -3.0597190240 | 0.5009758823  |
| H | 0.5773339947  | -2.8811444027 | -1.2231529163 |
| H | -0.3548689201 | -0.6738846481 | -2.2461707351 |
| C | -2.2124705663 | 0.2189975399  | -1.6498547148 |
| C | -3.2553467292 | -1.4245331345 | -0.0869271561 |
| C | -3.1992021584 | 0.0412914866  | -0.4941281187 |
| H | -2.6253668018 | -0.3002767379 | -2.5223353134 |
| H | -2.1276930859 | 1.2793027076  | -1.9150152825 |
| H | -3.8264608226 | -1.9794605134 | -0.8460770649 |
| H | -3.8177908941 | -1.5361355329 | 0.8475517053  |
| C | -0.9384261070 | -1.6094121202 | -0.4672344534 |
| N | -1.9806177213 | -2.0866312253 | 0.0772838873  |
| C | 1.3947022097  | -0.0095782471 | -0.1869628263 |
| C | 1.5304359424  | -1.3889378445 | -0.0275982732 |
| C | 2.4934905344  | 0.8233542230  | 0.1030433741  |
| C | 2.7532109196  | -1.9262237977 | 0.3940770262  |
| H | 2.8487099132  | -3.0038496068 | 0.5161306927  |
| C | 3.8279187494  | -1.0956744562 | 0.6596927361  |
| H | 4.7761193295  | -1.5176730458 | 0.9877707955  |
| C | 3.7086938686  | 0.2862534254  | 0.5184856095  |
| H | 4.5567714019  | 0.9280789475  | 0.7369158135  |
| C | -2.8664536720 | 1.0014746229  | 0.6250377654  |
| O | -2.9037007569 | 2.2001964674  | 0.5053707708  |
| O | -2.5080354806 | 0.4055758010  | 1.7626893236  |
| H | -2.3128858180 | 1.0983652648  | 2.4120177428  |
| H | -4.1918147891 | 0.3584796570  | -0.8384267491 |
| O | 2.2701170452  | 2.1470904499  | -0.0488454455 |
| C | 3.3187740000  | 3.0461847065  | 0.2070738937  |
| H | 2.9261328311  | 4.0487033245  | 0.0207008347  |
| H | 3.6598982826  | 2.9815046796  | 1.2497873420  |
| H | 4.1757983270  | 2.8660624228  | -0.4569276245 |

Electronic Energy (RPW6B95D3/def2-SVP)= -862.754369116 (Hartree/Particle)

Dipole Moment= 2.2187 (Debye)  
Number of imaginary frequencies 0

THERMOCHEMICAL DATA (Temperature 298.150 Kelvin. Pressure 1.00000 Atm)

Zero-point correction= 0.302144 (Hartree/Particle)  
Sum of electronic and zero-point Energies= -862.452225  
Sum of electronic and thermal Energies= -862.436125  
Sum of electronic and thermal Enthalpies= -862.435181  
Sum of electronic and thermal Free Energies= -862.496719

Electronic Energy SP (RPW6B95D3/def2-QZVPP)= -863.759683190 (Hartree/Particle)  
Corrected Free Energy= -863.502033074 (Hartree/Particle)

-----  
CONFORMER 13

CARTESIAN COORDINATES



|   |               |               |               |
|---|---------------|---------------|---------------|
| C | 0.8192451751  | 0.2060127432  | -1.8209621627 |
| C | -0.6700664694 | -0.1011515589 | -1.6625831731 |
| C | 0.2981594517  | -2.2238568066 | -0.6029666683 |
| H | 0.9643436638  | 1.2500426500  | -2.1116933858 |
| H | 1.2245713711  | -0.4091996979 | -2.6375973575 |
| H | 0.0038629885  | -3.0677574729 | 0.0265000418  |
| H | 0.7378053773  | -2.6307395974 | -1.5286579242 |
| H | -1.1396618287 | -0.1580022816 | -2.6561177694 |
| C | -1.4077389365 | 0.9889136198  | -0.8596032078 |
| C | -3.1271651675 | -0.8454124727 | -1.0044203371 |
| C | -2.8034406789 | 0.5196386057  | -0.3883996444 |
| H | -1.5000755734 | 1.8828875548  | -1.4839460760 |
| H | -0.7811771371 | 1.2687921287  | -0.0032410320 |
| H | -3.2046254386 | -0.7321146343 | -2.0954717785 |
| H | -4.0939234101 | -1.2184605892 | -0.6494214781 |
| C | -0.9057512551 | -1.4191871063 | -0.9822712450 |
| N | -2.0825302848 | -1.7913951110 | -0.6519545403 |
| C | 1.5580256588  | -0.1014269003 | -0.5513777045 |
| C | 1.3000480312  | -1.3243366289 | 0.0703498765  |
| C | 2.4690992390  | 0.7907091196  | 0.0345770391  |
| C | 1.9321805066  | -1.6635480388 | 1.2661353178  |
| H | 1.7156506217  | -2.6162132875 | 1.7452508881  |
| C | 2.8347593720  | -0.7746412161 | 1.8332433702  |
| H | 3.3358201740  | -1.0287043932 | 2.7654784237  |
| C | 3.1084655205  | 0.4497035195  | 1.2287140020  |
| H | 3.8145094857  | 1.1321440025  | 1.6922408453  |
| C | -2.8773660480 | 0.4996753985  | 1.1313814179  |
| O | -3.1296008931 | 1.4850398901  | 1.7757232592  |
| O | -2.6265833530 | -0.6559562474 | 1.7449410692  |
| H | -2.3925745731 | -1.3566624631 | 1.0999579242  |
| H | -3.5567258364 | 1.2497726907  | -0.6985566252 |
| O | 2.6692214574  | 1.9551420444  | -0.6179077390 |
| C | 3.5510183676  | 2.9006648513  | -0.0675351346 |
| H | 3.2208944108  | 3.2287392804  | 0.9280191229  |
| H | 4.5721635250  | 2.5021687022  | 0.0111622457  |
| H | 3.5536121380  | 3.7584331838  | -0.7443410878 |

Electronic Energy (RPW6B95D3/def2-SVP)= -862.753967755 (Hartree/Particle)

Dipole Moment= 6.8761 (Debye)

Number of imaginary frequencies 0

THERMOCHEMICAL DATA (Temperature 298.150 Kelvin. Pressure 1.00000 Atm)

Zero-point correction= 0.302648 (Hartree/Particle)

Sum of electronic and zero-point Energies= -862.451319

Sum of electronic and thermal Energies= -862.435584

Sum of electronic and thermal Enthalpies= -862.434640

Sum of electronic and thermal Free Energies= -862.495576

Electronic Energy SP (RPW6B95D3/def2-QZVPP)= -863.760881555 (Hartree/Particle)

Corrected Free Energy= -863.502489800 (Hartree/Particle)

-----  
CONFORMER 14

CARTESIAN COORDINATES

|   |               |               |               |
|---|---------------|---------------|---------------|
| C | 0.5822583720  | 1.0758274318  | 0.4169665338  |
| C | -0.6091658679 | 0.5853861486  | -0.4026978494 |
| C | 0.1243978227  | -1.6576324850 | 0.6046300007  |
| H | 0.2873768693  | 1.1059208058  | 1.4779807336  |
| H | 0.8448553666  | 2.0990663812  | 0.1361728750  |
| H | -0.1266654254 | -1.4410112964 | 1.6574928342  |
| H | -0.0156768587 | -2.7309511720 | 0.4511404774  |
| H | -0.3797973318 | 0.7371180113  | -1.4697243053 |

|   |               |               |               |
|---|---------------|---------------|---------------|
| C | -1.9136198047 | 1.3442125890  | -0.0977686216 |
| C | -2.7203750113 | -0.5663584589 | -1.5237039218 |
| C | -3.1573367490 | 0.5943055689  | -0.6279257006 |
| H | -1.8555990413 | 2.3414415755  | -0.5448739170 |
| H | -1.9887047656 | 1.4952856381  | 0.9858737232  |
| H | -2.1975613004 | -0.1588894105 | -2.4016459834 |
| H | -3.5859772620 | -1.1251943370 | -1.8956617875 |
| C | -0.8431142198 | -0.8883994884 | -0.2408379841 |
| N | -1.8501540851 | -1.4612472358 | -0.7790208533 |
| C | 1.7590480632  | 0.1606346121  | 0.2532772086  |
| C | 1.5362794276  | -1.2146576268 | 0.3375558759  |
| C | 3.0583221509  | 0.6348974327  | 0.0143042129  |
| C | 2.5877112244  | -2.1173084661 | 0.1786755057  |
| H | 2.3997290042  | -3.1874258787 | 0.2396910708  |
| C | 3.8680556151  | -1.6360861442 | -0.0561547086 |
| H | 4.6964657883  | -2.3310548978 | -0.1804067145 |
| C | 4.1128651390  | -0.2675830362 | -0.1394551314 |
| H | 5.1224161241  | 0.0864672814  | -0.3250701464 |
| C | -4.0409513598 | 0.1370479282  | 0.5247803466  |
| O | -4.8169885233 | 0.8789773247  | 1.0695769013  |
| O | -3.9185854889 | -1.1238643112 | 0.9377818027  |
| H | -3.2082979823 | -1.5913272512 | 0.4502778567  |
| H | -3.7812706068 | 1.2873216647  | -1.2002313536 |
| O | 3.2036437643  | 1.9754924690  | -0.0489105980 |
| C | 4.4776918453  | 2.5104149965  | -0.3036623601 |
| H | 4.8698811546  | 2.1751663318  | -1.2740795995 |
| H | 4.3645011812  | 3.5970426724  | -0.3197792464 |
| H | 5.1952355745  | 2.2355776428  | 0.4820503706  |

Electronic Energy (RPW6B95D3/def2-SVP)= -862.752988678 (Hartree/Particle)

Dipole Moment= 8.1807 (Debye)

Number of imaginary frequencies 0

THERMOCHEMICAL DATA (Temperature 298.150 Kelvin. Pressure 1.00000 Atm)

Zero-point correction= 0.302389 (Hartree/Particle)

Sum of electronic and zero-point Energies= -862.450600

Sum of electronic and thermal Energies= -862.434743

Sum of electronic and thermal Enthalpies= -862.433799

Sum of electronic and thermal Free Energies= -862.494620

Electronic Energy SP (RPW6B95D3/def2-QZVPP)= -863.760014008 (Hartree/Particle)

Corrected Free Energy= -863.501645330 (Hartree/Particle)

-----  
CONFORMER 15

CARTESIAN COORDINATES

|   |               |               |               |
|---|---------------|---------------|---------------|
| C | 0.6595135092  | 0.7320017235  | 0.7200149052  |
| C | -0.5424729497 | 0.1811994244  | -0.0456626373 |
| C | 0.5825785476  | -2.0740977571 | 0.4691190678  |
| H | 0.4905318800  | 0.6067428222  | 1.8012618899  |
| H | 0.7565192144  | 1.8064289620  | 0.5401103208  |
| H | 0.5873545172  | -2.2620617801 | 1.5557322441  |
| H | 0.5218667621  | -3.0609031177 | -0.0010735553 |
| H | -0.3125862980 | 0.3024779419  | -1.1175457217 |
| C | -1.8461114007 | 0.8962792395  | 0.2514794118  |
| C | -3.0468419138 | -1.2787980691 | 0.0196402506  |
| C | -2.9738505225 | 0.1792063884  | -0.4626890473 |
| H | -1.7950078502 | 1.9449473495  | -0.0607738255 |
| H | -2.0400784101 | 0.8952262062  | 1.3331417035  |
| H | -3.6450870574 | -1.8867195099 | -0.6745960646 |
| H | -3.5832398285 | -1.3238733148 | 0.9806012125  |
| C | -0.6885001580 | -1.3057874130 | 0.1849326556  |
| N | -1.7841638740 | -1.9460627613 | 0.2053264469  |

|   |               |               |               |
|---|---------------|---------------|---------------|
| C | 1.9071679869  | 0.0198871848  | 0.2920957327  |
| C | 1.8538481755  | -1.3624541208 | 0.1086214449  |
| C | 3.1017696760  | 0.7071657625  | 0.0210554244  |
| C | 2.9768852389  | -2.0567557631 | -0.3470237597 |
| H | 2.9247808774  | -3.1345440140 | -0.4905198759 |
| C | 4.1515451571  | -1.3678841354 | -0.6101779987 |
| H | 5.0299851205  | -1.9038466463 | -0.9650644072 |
| C | 4.2250199558  | 0.0111547966  | -0.4282409730 |
| H | 5.1529485541  | 0.5333125868  | -0.6410451727 |
| C | -4.3012427447 | 0.8723659502  | -0.2751829494 |
| O | -4.4733618892 | 1.8349791473  | 0.4225710304  |
| O | -5.3380860789 | 0.3337486447  | -0.9295570402 |
| H | -5.0590933658 | -0.4099255945 | -1.4774368875 |
| H | -2.7624947252 | 0.1711779036  | -1.5435655186 |
| O | 3.0801613091  | 2.0431813380  | 0.2210087646  |
| C | 4.2356090237  | 2.7909492708  | -0.0595623592 |
| H | 5.0808534942  | 2.4806726926  | 0.5706869136  |
| H | 4.5296007512  | 2.6999890784  | -1.1147692673 |
| H | 3.9944834521  | 3.8347715549  | 0.1556238773  |

Electronic Energy (RPW6B95D3/def2-SVP)= -862.750470178 (Hartree/Particle)

Dipole Moment= 5.1646 (Debye)

Number of imaginary frequencies 0

THERMOCHEMICAL DATA (Temperature 298.150 Kelvin. Pressure 1.00000 Atm)

Zero-point correction= 0.301212 (Hartree/Particle)

Sum of electronic and zero-point Energies= -862.449258

Sum of electronic and thermal Energies= -862.432820

Sum of electronic and thermal Enthalpies= -862.431876

Sum of electronic and thermal Free Energies= -862.494143

Electronic Energy SP (RPW6B95D3/def2-QZVPP)= -863.758093771 (Hartree/Particle)

Corrected Free Energy= -863.501766593 (Hartree/Particle)

-----  
CONFORMER 16

CARTESIAN COORDINATES

|   |               |               |               |
|---|---------------|---------------|---------------|
| C | 0.6067055670  | 0.7380980964  | 0.6529862119  |
| C | -0.5816678584 | 0.0872750238  | -0.0532767172 |
| C | 0.6092514163  | -2.0773812081 | 0.6598762245  |
| H | 0.4478780747  | 0.7010235912  | 1.7422706755  |
| H | 0.6722765529  | 1.7953205715  | 0.3804716076  |
| H | 0.6252469555  | -2.1534549066 | 1.7599919414  |
| H | 0.5754730257  | -3.1078149707 | 0.2918808437  |
| H | -0.3643208446 | 0.1240847164  | -1.1338034322 |
| C | -1.9031912032 | 0.7892783686  | 0.1921650459  |
| C | -3.0422375743 | -1.4319702496 | 0.1285461417  |
| C | -3.0200027751 | -0.0268776957 | -0.4596293083 |
| H | -1.8629746342 | 1.8123827220  | -0.2022753803 |
| H | -2.0899248623 | 0.8700955765  | 1.2725424204  |
| H | -3.6211400001 | -2.0996487604 | -0.5234854715 |
| H | -3.5983462791 | -1.4095599407 | 1.0768038092  |
| C | -0.6847552522 | -1.3785379670 | 0.3067240123  |
| N | -1.7613997217 | -2.0452030597 | 0.3790051153  |
| C | 1.8711586140  | 0.0262217661  | 0.2766435718  |
| C | 1.8565238948  | -1.3682427784 | 0.2198755762  |
| C | 3.0421992696  | 0.7198964177  | -0.0694301841 |
| C | 2.9946595867  | -2.0685103123 | -0.1862818655 |
| H | 2.9728372675  | -3.1558811198 | -0.2316647436 |
| C | 4.1456820694  | -1.3729581610 | -0.5258782270 |
| H | 5.0355836155  | -1.9136636914 | -0.8430190037 |
| C | 4.1806642127  | 0.0182881599  | -0.4691004954 |
| H | 5.0904988460  | 0.5454977790  | -0.7397477974 |

|   |               |               |               |
|---|---------------|---------------|---------------|
| C | -4.3671166512 | 0.6454485028  | -0.3193794597 |
| O | -5.2873716802 | 0.2076295068  | 0.3173911270  |
| O | -4.4986532942 | 1.8173826111  | -0.9514446382 |
| H | -3.7007760733 | 2.0384538468  | -1.4473203358 |
| H | -2.8034573109 | -0.0833693930 | -1.5378837878 |
| O | 2.9842017132  | 2.0673535841  | 0.0110467646  |
| C | 4.1170928861  | 2.8177993511  | -0.3445668157 |
| H | 4.9747343224  | 2.5858687687  | 0.3024206013  |
| H | 4.4061455042  | 2.6425215100  | -1.3904218040 |
| H | 3.8495793398  | 3.8697801327  | -0.2189950679 |

Electronic Energy (RPW6B95D3/def2-SVP)= -862.750477186 (Hartree/Particle)

Dipole Moment= 7.8982 (Debye)  
 Number of imaginary frequencies 0

THERMOCHEMICAL DATA (Temperature 298.150 Kelvin. Pressure 1.00000 Atm)

Zero-point correction= 0.301623 (Hartree/Particle)  
 Sum of electronic and zero-point Energies= -862.448855  
 Sum of electronic and thermal Energies= -862.432521  
 Sum of electronic and thermal Enthalpies= -862.431577  
 Sum of electronic and thermal Free Energies= -862.493467

Electronic Energy SP (RPW6B95D3/def2-QZVPP)= -863.757988930 (Hartree/Particle)  
 Corrected Free Energy= -863.500978744 (Hartree/Particle)

-----  
 CONFORMER 17

CARTESIAN COORDINATES

|   |               |               |               |
|---|---------------|---------------|---------------|
| C | 0.6156294376  | 0.8217775045  | 0.1298187802  |
| C | -0.6016163863 | 0.1437922980  | -0.4984475651 |
| C | 0.5519807187  | -2.1051427907 | -0.2259482683 |
| H | 0.4050399776  | 1.0153970411  | 1.1936446846  |
| H | 0.7566189756  | 1.8093655277  | -0.3236836938 |
| H | 0.5372959367  | -2.9384484688 | 0.4862201282  |
| H | 0.4678837629  | -2.5685625391 | -1.2223709885 |
| H | -0.4245821616 | 0.0906719657  | -1.5853562383 |
| C | -1.8739310872 | 0.9315018655  | -0.2264825417 |
| C | -2.9621672609 | -1.1434998199 | 0.5805258993  |
| C | -3.0909881052 | 0.0454854572  | -0.3804845088 |
| H | -1.9347093361 | 1.8039605985  | -0.8862355353 |
| H | -1.8593199750 | 1.3201985080  | 0.8007679503  |
| H | -3.7686262478 | -1.8701660886 | 0.4091512226  |
| H | -3.0946699755 | -0.7956664619 | 1.6170648457  |
| C | -0.6903569479 | -1.2843650404 | -0.0219941039 |
| N | -1.7088466777 | -1.8498793232 | 0.4852713352  |
| C | 1.8803142846  | 0.0259640451  | 0.0065926327  |
| C | 1.8570535763  | -1.3577632661 | -0.1562123447 |
| C | 3.1225544285  | 0.6867874151  | 0.0814959462  |
| C | 3.0583240061  | -2.0703920907 | -0.2592019924 |
| H | 3.0296179396  | -3.1511565273 | -0.3878668023 |
| C | 4.2710558866  | -1.4066861653 | -0.1947051424 |
| H | 5.2030148119  | -1.9633177535 | -0.2747264006 |
| C | 4.3152037720  | -0.0235975915 | -0.0240052789 |
| H | 5.2730406344  | 0.4849416821  | 0.0286688450  |
| C | -4.3764274596 | 0.7968173376  | -0.1347905861 |
| O | -4.4375444100 | 1.9199776651  | 0.2875035676  |
| O | -5.5037795001 | 0.1203886793  | -0.3881139939 |
| H | -5.3130397824 | -0.7515492769 | -0.7550038237 |
| H | -3.1311898609 | -0.3574062364 | -1.4050365743 |
| O | 3.0612400096  | 2.0242088064  | 0.2624265605  |
| C | 4.2590490549  | 2.7556147552  | 0.3232127716  |
| H | 4.8845953398  | 2.4356496567  | 1.1683163670  |
| H | 4.8403776594  | 2.6556246388  | -0.6041802327 |

H 3.9813009568 3.8034448414 0.4604133849

Electronic Energy (RPW6B95D3/def2-SVP)= -862.750664761 (Hartree/Particle)

Dipole Moment= 4.9059 (Debye)

Number of imaginary frequencies 0

THERMOCHEMICAL DATA (Temperature 298.150 Kelvin. Pressure 1.00000 Atm)

Zero-point correction= 0.301435 (Hartree/Particle)

Sum of electronic and zero-point Energies= -862.449230

Sum of electronic and thermal Energies= -862.432835

Sum of electronic and thermal Enthalpies= -862.431890

Sum of electronic and thermal Free Energies= -862.493976

Electronic Energy SP (RPW6B95D3/def2-QZVPP)= -863.758516807 (Hartree/Particle)

Corrected Free Energy= -863.501828046 (Hartree/Particle)

-----  
CONFORMER 18

CARTESIAN COORDINATES

|   |               |               |               |
|---|---------------|---------------|---------------|
| C | 0.8019843933  | 0.3823775200  | -1.5618711266 |
| C | -0.6257323456 | -0.1527934445 | -1.3473891561 |
| C | 0.6665428962  | -2.2815873270 | -0.8492692396 |
| H | 0.7883256131  | 1.4753671736  | -1.5956973321 |
| H | 1.1599715240  | 0.0484398222  | -2.5465030478 |
| H | 0.5741024786  | -3.2707333689 | -0.3942961886 |
| H | 0.8880529803  | -2.4024151997 | -1.9212105403 |
| H | -1.0763369037 | -0.2986499111 | -2.3413826452 |
| C | -1.5215385348 | 0.7880667049  | -0.5609368092 |
| C | -2.6970144640 | -1.2052446145 | 0.3936674861  |
| C | -2.8692308197 | 0.1220304322  | -0.3650562871 |
| H | -1.6390016424 | 1.7431627385  | -1.0840827515 |
| H | -1.0702974541 | 1.0109995999  | 0.4163379508  |
| H | -3.5721761862 | -1.8545262841 | 0.2453362970  |
| H | -2.6613277887 | -1.0108257423 | 1.4770814711  |
| C | -0.6145330764 | -1.5117917478 | -0.6794772219 |
| N | -1.5225492000 | -1.9770384566 | 0.0751282759  |
| C | 1.7689326026  | -0.1022495239 | -0.5230088476 |
| C | 1.7399591483  | -1.4575310736 | -0.1879774880 |
| C | 2.7074338394  | 0.7397969001  | 0.0931736355  |
| C | 2.6250238154  | -1.9768657302 | 0.7565213881  |
| H | 2.5837575327  | -3.0324733481 | 1.0178049159  |
| C | 3.5506239362  | -1.1342739281 | 1.3566664689  |
| H | 4.2484684222  | -1.5284595683 | 2.0932002257  |
| C | 3.5982680480  | 0.2200771662  | 1.0349144883  |
| H | 4.3284960479  | 0.8613117353  | 1.5192551494  |
| C | -3.8536674467 | 1.0209809405  | 0.3434874571  |
| O | -3.6001948432 | 2.1240789122  | 0.7456786737  |
| O | -5.0773914887 | 0.5115672811  | 0.5351507177  |
| H | -5.1605299501 | -0.3654457018 | 0.1414607413  |
| H | -3.2962318198 | -0.1017504431 | -1.3557728798 |
| O | 2.6858120206  | 2.0370826099  | -0.2820314161 |
| C | 3.5767414244  | 2.9359317085  | 0.3275996729  |
| H | 3.4230741921  | 2.9819344280  | 1.4149463879  |
| H | 4.6233096004  | 2.6649642604  | 0.1296350242  |
| H | 3.3752513692  | 3.9193670431  | -0.1039345117 |

Electronic Energy (RPW6B95D3/def2-SVP)= -862.748808696 (Hartree/Particle)

Dipole Moment= 3.8515 (Debye)

Number of imaginary frequencies 0

THERMOCHEMICAL DATA (Temperature 298.150 Kelvin. Pressure 1.00000 Atm)

Zero-point correction= 0.301948 (Hartree/Particle)  
Sum of electronic and zero-point Energies= -862.446861  
Sum of electronic and thermal Energies= -862.430711  
Sum of electronic and thermal Enthalpies= -862.429766  
Sum of electronic and thermal Free Energies= -862.491171

Electronic Energy SP (RPW6B95D3/def2-QZVPP)= -863.756463120 (Hartree/Particle)  
Corrected Free Energy= -863.498825424 (Hartree/Particle)

-----  
CONFORMER 19

CARTESIAN COORDINATES

|   |               |               |               |
|---|---------------|---------------|---------------|
| C | 0.7174612126  | 0.2368953405  | -1.5705589437 |
| C | -0.6860534888 | -0.3215152943 | -1.2766100114 |
| C | 0.6872365262  | -2.3728868096 | -0.6745046203 |
| H | 0.6716431281  | 1.3236043168  | -1.6851341277 |
| H | 1.0565213335  | -0.1603747191 | -2.5382134853 |
| H | 0.6371047653  | -3.3307954901 | -0.1512013611 |
| H | 0.8923757319  | -2.5615685077 | -1.7400693257 |
| H | -1.1694985345 | -0.5308822805 | -2.2433077917 |
| C | -1.5784783457 | 0.6398943272  | -0.5108172795 |
| C | -2.7030808620 | -1.3385702321 | 0.5406494982  |
| C | -2.9182606467 | -0.0508104303 | -0.2486123236 |
| H | -1.7105842254 | 1.5668166731  | -1.0824629259 |
| H | -1.1041915636 | 0.9140155586  | 0.4426097873  |
| H | -3.5649406562 | -2.0064191426 | 0.4084382675  |
| H | -2.6945729256 | -1.0954465483 | 1.6124864862  |
| C | -0.6185663771 | -1.6392993491 | -0.5315046374 |
| N | -1.5032295686 | -2.0876559917 | 0.2586508459  |
| C | 1.7253884622  | -0.1435498243 | -0.5274085607 |
| C | 1.7467202574  | -1.4718724155 | -0.0971609324 |
| C | 2.6526662701  | 0.7677669003  | 0.0004606564  |
| C | 2.6703926942  | -1.8951508073 | 0.8582833087  |
| H | 2.6690849417  | -2.9300273492 | 1.1949469492  |
| C | 3.5831360117  | -0.9843407561 | 1.3725437702  |
| H | 4.3101435402  | -1.3036200008 | 2.1171263597  |
| C | 3.5816900734  | 0.3439359875  | 0.9532536477  |
| H | 4.3033972619  | 1.0393675897  | 1.3710089413  |
| C | -3.8938002062 | 0.8661418412  | 0.4559753258  |
| O | -4.3092060268 | 0.7004835970  | 1.5712335026  |
| O | -4.2856093686 | 1.9383642945  | -0.2421291155 |
| H | -3.9059180374 | 1.9356622273  | -1.1293773974 |
| H | -3.3592239670 | -0.2878100987 | -1.2293400707 |
| O | 2.5827161890  | 2.0326767083  | -0.4681628927 |
| C | 3.4707809303  | 2.9957191220  | 0.0390613419  |
| H | 3.3482419985  | 3.1272283933  | 1.1233465884  |
| H | 4.5167667603  | 2.7299834755  | -0.1688799568 |
| H | 3.2348302361  | 3.9365605697  | -0.4640767993 |

Electronic Energy (RPW6B95D3/def2-SVP)= -862.748870289 (Hartree/Particle)  
Dipole Moment= 7.0506 (Debye)  
Number of imaginary frequencies 0

THERMOCHEMICAL DATA (Temperature 298.150 Kelvin. Pressure 1.00000 Atm)

Zero-point correction= 0.301962 (Hartree/Particle)  
Sum of electronic and zero-point Energies= -862.446908  
Sum of electronic and thermal Energies= -862.430712  
Sum of electronic and thermal Enthalpies= -862.429768  
Sum of electronic and thermal Free Energies= -862.492017

Electronic Energy SP (RPW6B95D3/def2-QZVPP)= -863.756449266 (Hartree/Particle)

Corrected Free Energy= -863.499595977 (Hartree/Particle)

-----  
CONFORMERS of ENAMINE F

CONFORMER 1

CARTESIAN COORDINATES

|   |               |               |               |
|---|---------------|---------------|---------------|
| C | 0.6048660315  | -0.7788328456 | -0.3737634485 |
| C | -0.5906902397 | -0.1090951035 | 0.2877554321  |
| C | 0.5820003424  | 2.0297453494  | -0.1591254570 |
| H | 0.4202785386  | -0.8099470156 | -1.4620295596 |
| H | 0.6792075480  | -1.8197826421 | -0.0442984259 |
| H | 0.5841943858  | 3.1142722102  | -0.2701838174 |
| H | -0.4862837461 | -0.2053144535 | 1.3828730485  |
| C | -1.8915821550 | -0.7929950169 | -0.1090831204 |
| C | -3.0676563336 | 1.3946794329  | -0.1711582087 |
| C | -3.0949441221 | -0.0084652759 | 0.3998239849  |
| H | -1.9063868723 | -1.8154011599 | 0.2823725377  |
| H | -1.9481650754 | -0.8649168429 | -1.2054965546 |
| H | -3.8669299312 | 1.9991108493  | 0.2694935837  |
| H | -3.2740373531 | 1.3372452131  | -1.2539396951 |
| C | -0.5967461104 | 1.3763384299  | 0.0120102452  |
| N | -1.7976566646 | 2.0231881208  | 0.1084511301  |
| C | 1.8909154352  | -0.0533549007 | -0.1235273028 |
| C | 1.8596511604  | 1.3496871146  | -0.0648639918 |
| C | 3.1138541064  | -0.7275822730 | -0.0300046842 |
| C | 3.0643036840  | 2.0580879615  | 0.0799292509  |
| H | 3.0437510544  | 3.1458732624  | 0.1215756773  |
| C | 4.2656980980  | 1.3749235191  | 0.1788968786  |
| H | 5.1959097270  | 1.9285690896  | 0.2972208859  |
| C | 4.3071816668  | -0.0174722487 | 0.1318962107  |
| H | 5.2584387374  | -0.5345340360 | 0.2113095377  |
| H | -1.7659506102 | 3.0167656867  | -0.0731979070 |
| C | -4.4058969241 | -0.6818784334 | 0.0928898248  |
| O | -5.3470047579 | -0.1492669409 | -0.4385685806 |
| O | -4.4245851823 | -1.9536103237 | 0.4895181605  |
| H | -5.2944846999 | -2.3214337932 | 0.2727380937  |
| H | -3.0275767670 | 0.0467737436  | 1.4976814380  |
| O | 3.0572664731  | -2.0780683877 | -0.1193531440 |
| C | 4.2481668114  | -2.8133584048 | -0.0173935803 |
| H | 4.7438091071  | -2.6512123389 | 0.9504226102  |
| H | 3.9763624260  | -3.8682656467 | -0.1061418989 |
| H | 4.9536837264  | -2.5564210323 | -0.8203881671 |

Electronic Energy (RPW6B95D3/def2-SVP)= -862.763828747 (Hartree/Particle)

Dipole Moment= 2.1833 (Debye)

Number of imaginary frequencies 0

THERMOCHEMICAL DATA (Temperature 298.150 Kelvin. Pressure 1.00000 Atm)

Zero-point correction= 0.302356 (Hartree/Particle)

Sum of electronic and zero-point Energies= -862.461473

Sum of electronic and thermal Energies= -862.445163

Sum of electronic and thermal Enthalpies= -862.444219

Sum of electronic and thermal Free Energies= -862.505903

Electronic Energy SP (RPW6B95D3/def2-QZVPP)= -863.767081470 (Hartree/Particle)

Corrected Free Energy= -863.509155723 (Hartree/Particle)

-----  
CONFORMER 2

CARTESIAN COORDINATES

|   |               |               |               |
|---|---------------|---------------|---------------|
| C | 0.6110911983  | -0.7946309389 | -0.3463054143 |
| C | -0.5868951936 | -0.1210894140 | 0.3074774941  |
| C | 0.5791049453  | 2.0165788813  | -0.1616061963 |
| H | 0.4265734005  | -0.8387316353 | -1.4340737489 |
| H | 0.6895307095  | -1.8314151755 | -0.0048924995 |
| H | 0.5775737411  | 3.0997380585  | -0.2850567730 |
| H | -0.4828875010 | -0.2049380140 | 1.4034483983  |
| C | -1.8851305177 | -0.8116329253 | -0.0858544020 |
| C | -3.0620288122 | 1.3627757851  | -0.1917821134 |
| C | -3.0956570755 | -0.0319198629 | 0.4208808290  |
| H | -1.8881864226 | -1.8344279413 | 0.3094245613  |
| H | -1.9480110475 | -0.8882224045 | -1.1805633697 |
| H | -3.8674195054 | 1.9814116958  | 0.2198126647  |
| H | -3.2393660805 | 1.2725402177  | -1.2766719238 |
| C | -0.5968116357 | 1.3608103494  | 0.0145497331  |
| N | -1.8015598702 | 2.0031343207  | 0.1023431110  |
| C | 1.8945992083  | -0.0618321599 | -0.1037022934 |
| C | 1.8591072743  | 1.3415428412  | -0.0594915182 |
| C | 3.1197809489  | -0.7310733301 | -0.0028922447 |
| C | 3.0610834332  | 2.0555615925  | 0.0781227659  |
| H | 3.0367789703  | 3.1436315676  | 0.1084217299  |
| C | 4.2647287658  | 1.3774198959  | 0.1842270774  |
| H | 5.1931401132  | 1.9352326731  | 0.2968296395  |
| C | 4.3106152254  | -0.0152058379 | 0.1516338935  |
| H | 5.2635482031  | -0.5282794690 | 0.2365604832  |
| H | -1.7753041686 | 2.9954325842  | -0.0879176244 |
| C | -4.3822952765 | -0.7473835237 | 0.1076157240  |
| O | -5.1427851223 | -1.1964912013 | 0.9255923631  |
| O | -4.5939504461 | -0.8507976964 | -1.2067399759 |
| H | -5.4269370915 | -1.3282006631 | -1.3388057802 |
| H | -3.0500996014 | 0.0504501638  | 1.5126123473  |
| O | 3.0676956740  | -2.0824767253 | -0.0779026408 |
| C | 4.2609462696  | -2.8128728616 | 0.0323140042  |
| H | 4.9658661334  | -2.5623878271 | -0.7732300569 |
| H | 4.7556825250  | -2.6387726141 | 0.9985000255  |
| H | 3.9924367975  | -3.8694976622 | -0.0451667352 |

Electronic Energy (RPW6B95D3/def2-SVP)= -862.761768993 (Hartree/Particle)

Dipole Moment= 2.1122 (Debye)

Number of imaginary frequencies 0

THERMOCHEMICAL DATA (Temperature 298.150 Kelvin. Pressure 1.00000 Atm)

Zero-point correction= 0.302553 (Hartree/Particle)

Sum of electronic and zero-point Energies= -862.459216

Sum of electronic and thermal Energies= -862.442859

Sum of electronic and thermal Enthalpies= -862.441915

Sum of electronic and thermal Free Energies= -862.503956

Electronic Energy SP (RPW6B95D3/def2-QZVPP)= -863.765917096 (Hartree/Particle)

Corrected Free Energy= -863.508104103 (Hartree/Particle)

CONFORMER 3

CARTESIAN COORDINATES

|   |               |               |               |
|---|---------------|---------------|---------------|
| C | 0.6362599819  | -0.7753824345 | -0.4396558206 |
| C | -0.5717586099 | -0.1620508239 | 0.2538006983  |
| C | 0.5835335118  | 2.0131867453  | -0.0438598915 |
| H | 0.4594652465  | -0.7382897928 | -1.5290181664 |
| H | 0.7194089675  | -1.8346362666 | -0.1775387591 |
| H | 0.5756130710  | 3.1026230720  | -0.0840880698 |
| H | -0.4750613149 | -0.3290717323 | 1.3411801653  |



|   |               |               |               |
|---|---------------|---------------|---------------|
| C | -1.8638435416 | -0.8256966480 | -0.2006607692 |
| C | -3.0579610791 | 1.3523112844  | -0.1284810965 |
| C | -3.0753764588 | -0.0940985279 | 0.3429382428  |
| H | -1.8781559220 | -1.8748431832 | 0.1130219803  |
| H | -1.9120800051 | -0.8251112544 | -1.2996047988 |
| H | -3.8640754939 | 1.9162466050  | 0.3499353828  |
| H | -3.2462214836 | 1.3758278966  | -1.2172299191 |
| C | -0.5888514794 | 1.3385416031  | 0.0770348472  |
| N | -1.7964599042 | 1.9677108671  | 0.2108013667  |
| C | 1.9133699080  | -0.0548551553 | -0.1340579406 |
| C | 1.8673768859  | 1.3409763197  | 0.0148881077  |
| C | 3.1430472018  | -0.7209249969 | -0.0756226916 |
| C | 3.0630730368  | 2.0512654352  | 0.2136392255  |
| H | 3.0302330810  | 3.1338056383  | 0.3252728705  |
| C | 4.2710411510  | 1.3757745841  | 0.2767686898  |
| H | 5.1945616002  | 1.9300317159  | 0.4371120924  |
| C | 4.3275779153  | -0.0101765632 | 0.1400660952  |
| H | 5.2839862029  | -0.5210426805 | 0.1924976730  |
| H | -1.7718948515 | 2.9718515432  | 0.0976796648  |
| C | -4.3620101666 | -0.7933716972 | -0.0159653194 |
| O | -4.4397857523 | -1.9113687357 | -0.4552861550 |
| O | -5.4330568758 | -0.0367787796 | 0.2261378976  |
| H | -6.2208494920 | -0.5493440381 | -0.0100966561 |
| H | -3.0338592716 | -0.0867996351 | 1.4441411393  |
| O | 3.1016397941  | -2.0633011912 | -0.2524345127 |
| C | 4.2997506988  | -2.7913979365 | -0.1916614505 |
| H | 4.7884705897  | -2.6881243292 | 0.7876846019  |
| H | 4.0396457582  | -3.8409293233 | -0.3510709190 |
| H | 5.0067918102  | -2.4751039147 | -0.9718185815 |

Electronic Energy (RPW6B95D3/def2-SVP)= -862.763517129 (Hartree/Particle)

Dipole Moment= 2.9558 (Debye)

Number of imaginary frequencies 0

THERMOCHEMICAL DATA (Temperature 298.150 Kelvin. Pressure 1.00000 Atm)

Zero-point correction= 0.302167 (Hartree/Particle)

Sum of electronic and zero-point Energies= -862.461351

Sum of electronic and thermal Energies= -862.444995

Sum of electronic and thermal Enthalpies= -862.444051

Sum of electronic and thermal Free Energies= -862.505998

Electronic Energy SP (RPW6B95D3/def2-QZVPP)= -863.766754242 (Hartree/Particle)

Corrected Free Energy= -863.509235113 (Hartree/Particle)

-----  
CONFORMER 4

CARTESIAN COORDINATES

|   |               |               |               |
|---|---------------|---------------|---------------|
| C | 0.2374341735  | -0.8642952958 | 0.4064851868  |
| C | -0.7286141728 | 0.0307245757  | 1.1737442896  |
| C | 0.1143662970  | 1.8630390123  | -0.2688068278 |
| H | -0.2676985596 | -1.2278726306 | -0.5048432723 |
| H | 0.4681427747  | -1.7517298753 | 1.0038728587  |
| H | 0.0078077099  | 2.8440903741  | -0.7319074062 |
| H | -0.2363706526 | 0.3118490455  | 2.1187976888  |
| C | -2.0408756994 | -0.6942324852 | 1.5221126260  |
| C | -3.3568419948 | 1.3191911765  | 0.9182382093  |
| C | -3.2244853044 | -0.1756074899 | 0.7117375235  |
| H | -2.2836302493 | -0.5492541111 | 2.5804959494  |
| H | -1.9224792210 | -1.7720938652 | 1.3697828709  |
| H | -3.6553175656 | 1.5042356437  | 1.9612782344  |
| H | -4.1466223895 | 1.7185081556  | 0.2736474761  |
| C | -0.9270809382 | 1.3347503357  | 0.4301191802  |
| N | -2.1128206597 | 1.9849891270  | 0.5958201549  |

|   |               |               |               |
|---|---------------|---------------|---------------|
| C | 1.4967426581  | -0.1472058369 | 0.0273616912  |
| C | 1.4038308711  | 1.2070529738  | -0.3362529663 |
| C | 2.7301552590  | -0.8050081907 | -0.0432527491 |
| C | 2.5578592116  | 1.8803352957  | -0.7732915646 |
| H | 2.4890038656  | 2.9282430162  | -1.0607969472 |
| C | 3.7723727824  | 1.2162808765  | -0.8293500862 |
| H | 4.6640163129  | 1.7449179616  | -1.1632621931 |
| C | 3.8773725464  | -0.1244549093 | -0.4623854325 |
| H | 4.8382213959  | -0.6270914880 | -0.5132401463 |
| H | -2.1992529257 | 2.8650787922  | 0.1094513845  |
| C | -3.1344599299 | -0.5083966296 | -0.7626189296 |
| O | -3.3352086675 | 0.2675234238  | -1.6610087941 |
| O | -2.8338263093 | -1.7911069009 | -0.9729797968 |
| H | -2.8148568571 | -1.9391997724 | -1.9305657434 |
| H | -4.1379741424 | -0.6703272995 | 1.0700408083  |
| O | 2.7264560593  | -2.1155115189 | 0.3013379039  |
| C | 3.9344479783  | -2.8282563510 | 0.2626986909  |
| H | 4.3581745213  | -2.8543086370 | -0.7514282689 |
| H | 4.6820918816  | -2.3977748470 | 0.9441902619  |
| H | 3.7089465313  | -3.8494057626 | 0.5806057801  |

Electronic Energy (RPW6B95D3/def2-SVP)= -862.759723534 (Hartree/Particle)

Dipole Moment= 3.6632 (Debye)

Number of imaginary frequencies 0

THERMOCHEMICAL DATA (Temperature 298.150 Kelvin. Pressure 1.00000 Atm)

Zero-point correction= 0.302392 (Hartree/Particle)

Sum of electronic and zero-point Energies= -862.457332

Sum of electronic and thermal Energies= -862.441108

Sum of electronic and thermal Enthalpies= -862.440163

Sum of electronic and thermal Free Energies= -862.501688

Electronic Energy SP (RPW6B95D3/def2-QZVPP)= -863.761355383 (Hartree/Particle)

Corrected Free Energy= -863.503319849 (Hartree/Particle)

-----  
CONFORMER 5

CARTESIAN COORDINATES

|   |               |               |               |
|---|---------------|---------------|---------------|
| C | 0.3290601762  | -0.9660059802 | 0.2549641175  |
| C | -0.7181672626 | -0.1772661767 | 1.0319539818  |
| C | 0.1526889795  | 1.8075327097  | -0.1862891311 |
| H | -0.1294352708 | -1.2548636209 | -0.7052514238 |
| H | 0.5581221635  | -1.8947631302 | 0.7866684252  |
| H | 0.0455958340  | 2.8345040753  | -0.5357867304 |
| H | -0.3149828495 | 0.0255465031  | 2.0379747206  |
| C | -2.0133432209 | -1.0029936873 | 1.2053642613  |
| C | -3.2432488619 | 1.1573092553  | 1.1937963065  |
| C | -3.2672290634 | -0.2919898617 | 0.7245674244  |
| H | -2.1493002306 | -1.2490982487 | 2.2635565429  |
| H | -1.9106796021 | -1.9515640648 | 0.6671377595  |
| H | -3.2156021476 | 1.1766367733  | 2.2956813813  |
| H | -4.1494141840 | 1.6817441439  | 0.8784209889  |
| C | -0.9013854114 | 1.1949513788  | 0.4189867141  |
| N | -2.1040820457 | 1.8052089850  | 0.5980769394  |
| C | 1.5806676569  | -0.1862681037 | -0.0049329293 |
| C | 1.4583650978  | 1.1887489154  | -0.2684789304 |
| C | 2.8367690097  | -0.7996592020 | -0.0709973045 |
| C | 2.6070519792  | 1.9269175644  | -0.6038363421 |
| H | 2.5162882669  | 2.9916954049  | -0.8128347292 |
| C | 3.8436576222  | 1.3051493489  | -0.6585561142 |
| H | 4.7303136667  | 1.8836245181  | -0.9140831217 |
| C | 3.9777944065  | -0.0561277235 | -0.3889280456 |
| H | 4.9559551674  | -0.5244730382 | -0.4369014127 |

|   |               |               |               |
|---|---------------|---------------|---------------|
| H | -2.1974777205 | 2.7652809415  | 0.3038947375  |
| C | -3.3759197419 | -0.3218190841 | -0.7836861627 |
| O | -2.5763979022 | -0.8272014728 | -1.5296958723 |
| O | -4.4758385953 | 0.2936770359  | -1.2176547249 |
| H | -4.4772657301 | 0.2555143391  | -2.1859257517 |
| H | -4.1641551317 | -0.7818636144 | 1.1251061601  |
| O | 2.8615814017  | -2.1324980818 | 0.1752720914  |
| C | 4.0920599182  | -2.8051163589 | 0.1399280104  |
| H | 3.8858620568  | -3.8531991839 | 0.3720365644  |
| H | 4.5604196482  | -2.7440599777 | -0.8529007559 |
| H | 4.7956068480  | -2.4054531797 | 0.8843741407  |

Electronic Energy (RPW6B95D3/def2-SVP)= -862.760650701 (Hartree/Particle)

Dipole Moment= 4.8987 (Debye)

Number of imaginary frequencies 0

THERMOCHEMICAL DATA (Temperature 298.150 Kelvin. Pressure 1.00000 Atm)

Zero-point correction= 0.302137 (Hartree/Particle)

Sum of electronic and zero-point Energies= -862.458514

Sum of electronic and thermal Energies= -862.442174

Sum of electronic and thermal Enthalpies= -862.441230

Sum of electronic and thermal Free Energies= -862.502794

Electronic Energy SP (RPW6B95D3/def2-QZVPP)= -863.761871832 (Hartree/Particle)

Corrected Free Energy= -863.504015131 (Hartree/Particle)

-----  
CONFORMER 6

CARTESIAN COORDINATES

|   |               |               |               |
|---|---------------|---------------|---------------|
| C | 0.6360896382  | -0.9583957674 | -0.1466016244 |
| C | -0.5787153130 | -0.3259651319 | 0.5211899729  |
| C | 0.3970727108  | 1.8686365365  | -0.1568727578 |
| H | 0.3804406838  | -1.1431746548 | -1.2047949987 |
| H | 0.8337943655  | -1.9413672927 | 0.2917704403  |
| H | 0.2997323673  | 2.9411588483  | -0.3240754303 |
| H | -0.4592843366 | -0.3880260917 | 1.6170640370  |
| C | -1.8478949894 | -1.0779048335 | 0.1208890712  |
| C | -2.8807765009 | 0.9654535842  | 1.1771766259  |
| C | -3.1369224116 | -0.4577811487 | 0.6640064263  |
| H | -1.7618941601 | -2.1239771800 | 0.4347926296  |
| H | -1.9048953422 | -1.0862839625 | -0.9739474611 |
| H | -2.4855691672 | 0.9063193529  | 2.2037370140  |
| H | -3.8156774799 | 1.5289607042  | 1.2247203730  |
| C | -0.6935361130 | 1.1391324568  | 0.1827655701  |
| N | -1.9629066720 | 1.6438977551  | 0.2921336272  |
| C | 1.8686911415  | -0.1064383553 | -0.1015544017 |
| C | 1.7270101073  | 1.2890266086  | -0.1725708761 |
| C | 3.1479723575  | -0.6745137346 | -0.0854019711 |
| C | 2.8763479091  | 2.0946557535  | -0.2307829257 |
| H | 2.7681527440  | 3.1765904423  | -0.2871615271 |
| C | 4.1352689371  | 1.5161546046  | -0.2061670168 |
| H | 5.0225262464  | 2.1461383390  | -0.2470744795 |
| C | 4.2883349481  | 0.1333212525  | -0.1278494264 |
| H | 5.2825372976  | -0.3022664706 | -0.1108020630 |
| H | -2.0503836634 | 2.6493030606  | 0.2437378500  |
| C | -4.2346505891 | -0.4613936594 | -0.3782535809 |
| O | -4.1330682477 | -0.8450307726 | -1.5148365231 |
| O | -5.3786451248 | 0.0178694836  | 0.1146766010  |
| H | -6.0399816315 | -0.0016892281 | -0.5929111159 |
| H | -3.5338586138 | -1.0369379478 | 1.5077654892  |
| O | 3.1962950805  | -2.0276539480 | -0.0413610921 |
| C | 4.4485569687  | -2.6599261449 | -0.0040461883 |
| H | 5.0271320257  | -2.3628116355 | 0.8822954090  |

H 4.2579275864 -3.7352953359 0.0389561681  
H 5.0426086709 -2.4372145082 -0.9018446806

Electronic Energy (RPW6B95D3/def2-SVP)= -862.759698676 (Hartree/Particle)

Dipole Moment= 3.9975 (Debye)

Number of imaginary frequencies 0

THERMOCHEMICAL DATA (Temperature 298.150 Kelvin. Pressure 1.00000 Atm)

Zero-point correction= 0.302653 (Hartree/Particle)

Sum of electronic and zero-point Energies= -862.457045

Sum of electronic and thermal Energies= -862.440777

Sum of electronic and thermal Enthalpies= -862.439833

Sum of electronic and thermal Free Energies= -862.502190

Electronic Energy SP (RPW6B95D3/def2-QZVPP)= -863.763111838 (Hartree/Particle)

Corrected Free Energy= -863.505603162 (Hartree/Particle)

-----  
CONFORMER 7

CARTESIAN COORDINATES

C 0.7451995179 -0.4794153523 1.5686349085  
C -0.7241707974 -0.0857448065 1.4725533677  
C -0.0116619291 1.7921168851 -0.0041169968  
H 0.8328928461 -1.5594763796 1.7291024492  
H 1.1723557499 -0.0090615834 2.4683747112  
H -0.2381182484 2.7107958019 -0.5448912956  
H -1.1091350624 -0.0060265508 2.4971279606  
C -1.6119787209 -1.1022473293 0.7368125968  
C -3.2386771759 0.7567398218 1.2780164448  
C -2.9990217828 -0.4904619416 0.4265181908  
H -1.7223883407 -1.9974746306 1.3584584817  
H -1.1193971328 -1.4162554857 -0.1905470267  
H -3.2610837568 0.4715854137 2.3371436503  
H -4.2065056765 1.2051132658 1.0410663945  
C -0.9408104919 1.2460503472 0.8148711546  
N -2.2029152006 1.7491173818 1.0311935307  
C 1.5739890557 -0.0611702382 0.3889314139  
C 1.2260997230 1.1005824006 -0.3191560750  
C 2.7369703333 -0.7600503156 0.0434852588  
C 2.0576838860 1.5462229360 -1.3598157405  
H 1.7872734593 2.4460093644 -1.9099995214  
C 3.2023952192 0.8395335770 -1.6912524984  
H 3.8401392845 1.1888184108 -2.5018050283  
C 3.5534622047 -0.3194139191 -1.0024755397  
H 4.4548018169 -0.8600947052 -1.2738779296  
H -2.4834737457 2.4532853467 0.3613290014  
C -3.1704410818 -0.1391667396 -1.0341939402  
O -3.5563158220 0.9262186326 -1.4475748684  
O -2.8718214028 -1.1553065145 -1.8420111705  
H -3.0130995377 -0.8618933901 -2.7547066945  
H -3.7763139690 -1.2369686329 0.6389999596  
O 3.0107676243 -1.8572147725 0.7893163533  
C 4.1468844741 -2.6210557194 0.4805351162  
H 4.1673075221 -3.4554480237 1.1862157047  
H 4.1025721954 -3.0186649997 -0.5434301967  
H 5.0712830661 -2.0363954877 0.5906764993

Electronic Energy (RPW6B95D3/def2-SVP)= -862.757841158 (Hartree/Particle)

Dipole Moment= 3.5447 (Debye)

Number of imaginary frequencies 0

THERMOCHEMICAL DATA (Temperature 298.150 Kelvin. Pressure 1.00000 Atm)

Zero-point correction= 0.302767 (Hartree/Particle)  
Sum of electronic and zero-point Energies= -862.455074  
Sum of electronic and thermal Energies= -862.438952  
Sum of electronic and thermal Enthalpies= -862.438008  
Sum of electronic and thermal Free Energies= -862.499382  
  
Electronic Energy SP (RPW6B95D3/def2-QZVPP)= -863.760857950 (Hartree/Particle)  
Corrected Free Energy= -863.502398792 (Hartree/Particle)

-----  
CONFORMER 8

CARTESIAN COORDINATES

|   |               |               |               |
|---|---------------|---------------|---------------|
| C | 0.7565911792  | -0.7192361593 | 1.4599596434  |
| C | -0.7135018762 | -0.3147334491 | 1.4347648541  |
| C | -0.0047971238 | 1.7620801133  | 0.2438202318  |
| H | 0.8427420523  | -1.8112346186 | 1.4529203126  |
| H | 1.1913469305  | -0.3934279843 | 2.4180902252  |
| H | -0.2321588915 | 2.7512744190  | -0.1529646339 |
| H | -1.0803802822 | -0.3628857691 | 2.4682427539  |
| C | -1.6200018727 | -1.2350867563 | 0.5980650507  |
| C | -3.2297529124 | 0.5376559296  | 1.3757728742  |
| C | -2.9838275183 | -0.5747076820 | 0.3480785133  |
| H | -1.7451934172 | -2.1859106788 | 1.1275551265  |
| H | -1.1434830601 | -1.4528206253 | -0.3642153875 |
| H | -3.2275606179 | 0.0977572326  | 2.3813691952  |
| H | -4.2053619539 | 1.0050222237  | 1.2297457818  |
| C | -0.9342257720 | 1.0956624361  | 0.9667597005  |
| N | -2.1994712143 | 1.5558869131  | 1.2539175726  |
| C | 1.5823583397  | -0.1276175877 | 0.3545003937  |
| C | 1.2333119188  | 1.1267952933  | -0.1710995806 |
| C | 2.7465576020  | -0.7647210674 | -0.0916900277 |
| C | 2.0641095767  | 1.7249878126  | -1.1327651676 |
| H | 1.7923575809  | 2.6968343224  | -1.5415491810 |
| C | 3.2099532425  | 1.0778528737  | -1.5664636558 |
| H | 3.8471520795  | 1.5457289039  | -2.3153023406 |
| C | 3.5625142716  | -0.1708977148 | -1.0594403710 |
| H | 4.4646138808  | -0.6633839884 | -1.4088176630 |
| H | -2.4819601402 | 2.3841206005  | 0.7468333741  |
| C | -3.0852259339 | -0.0309286086 | -1.0645758235 |
| O | -2.3878851236 | -0.3553951536 | -1.9904971673 |
| O | -4.0731209521 | 0.8574089691  | -1.1929656346 |
| H | -4.0977413368 | 1.1419140179  | -2.1189280079 |
| H | -3.7904076525 | -1.3171296319 | 0.4296580303  |
| O | 3.0224720045  | -1.9605057909 | 0.4820433287  |
| C | 4.1619857034  | -2.6659637572 | 0.0657979180  |
| H | 5.0838269015  | -2.1001321533 | 0.2621526341  |
| H | 4.1853368902  | -3.5950311725 | 0.6410459803  |
| H | 4.1202870459  | -2.9088604162 | -1.0055555584 |

Electronic Energy (RPW6B95D3/def2-SVP)= -862.757730192 (Hartree/Particle)

Dipole Moment= 3.6861 (Debye)  
Number of imaginary frequencies 0

THERMOCHEMICAL DATA (Temperature 298.150 Kelvin. Pressure 1.00000 Atm)

Zero-point correction= 0.302865 (Hartree/Particle)  
Sum of electronic and zero-point Energies= -862.454866  
Sum of electronic and thermal Energies= -862.438777  
Sum of electronic and thermal Enthalpies= -862.437833  
Sum of electronic and thermal Free Energies= -862.499917

Electronic Energy SP (RPW6B95D3/def2-QZVPP)= -863.760449483 (Hartree/Particle)  
Corrected Free Energy= -863.502636291 (Hartree/Particle)

-----  
CONFORMER 9

CARTESIAN COORDINATES

|   |               |               |               |
|---|---------------|---------------|---------------|
| C | 0.7536795617  | -0.6906495209 | 1.4297224302  |
| C | -0.7023130963 | -0.2418788413 | 1.3468869335  |
| C | 0.1195822236  | 1.8237179905  | 0.2097817440  |
| H | 0.8076735532  | -1.7844882555 | 1.4061352972  |
| H | 1.1488755372  | -0.3965095706 | 2.4148055932  |
| H | -0.0696072113 | 2.8151373366  | -0.2012655491 |
| H | -1.1122286285 | -0.2962040774 | 2.3639040137  |
| C | -1.5967019104 | -1.1204074729 | 0.4595954321  |
| C | -3.1864418616 | 0.6825161080  | 1.2749270971  |
| C | -3.0360775873 | -0.5621882775 | 0.3675564062  |
| H | -1.6185736064 | -2.1362107416 | 0.8694383416  |
| H | -1.1457391986 | -1.1827853169 | -0.5377658666 |
| H | -3.1821092592 | 0.3355929185  | 2.3163177698  |
| H | -4.1542257988 | 1.1662348581  | 1.1134737537  |
| C | -0.8662878051 | 1.1712643460  | 0.8697705058  |
| N | -2.1373049170 | 1.6511849628  | 1.0582782381  |
| C | 1.6527581751  | -0.1046699431 | 0.3804032709  |
| C | 1.3633440983  | 1.1660081934  | -0.1430978380 |
| C | 2.8244875875  | -0.7646118033 | -0.0087283123 |
| C | 2.2637535113  | 1.7565613550  | -1.0459811902 |
| H | 2.0401286612  | 2.7408837600  | -1.4542202234 |
| C | 3.4167783695  | 1.0874197647  | -1.4232309807 |
| H | 4.1074285143  | 1.5508093322  | -2.1261497704 |
| C | 3.7097797524  | -0.1774600112 | -0.9178275285 |
| H | 4.6186530385  | -0.6866404462 | -1.2227604315 |
| H | -2.3886271097 | 2.4557716660  | 0.5014507437  |
| C | -3.4654445846 | -0.2083671916 | -1.0323500355 |
| O | -4.5407500267 | -0.4737680070 | -1.5077129142 |
| O | -2.5401979669 | 0.4867136410  | -1.6979089363 |
| H | -2.9001258548 | 0.7012228049  | -2.5717657385 |
| H | -3.7632753629 | -1.3040048886 | 0.7099766043  |
| O | 3.0366718890  | -1.9762460523 | 0.5597140749  |
| C | 4.1781861936  | -2.7058487286 | 0.1938970350  |
| H | 4.1422311053  | -3.6472145470 | 0.7481349295  |
| H | 4.1921863717  | -2.9241740382 | -0.8834836538 |
| H | 5.1025809509  | -2.1714705492 | 0.4556173761  |

Electronic Energy (RPW6B95D3/def2-SVP)= -862.755022032 (Hartree/Particle)

Dipole Moment= 0.9261 (Debye)  
Number of imaginary frequencies 0

THERMOCHEMICAL DATA (Temperature 298.150 Kelvin. Pressure 1.00000 Atm)

|                                              |                             |
|----------------------------------------------|-----------------------------|
| Zero-point correction=                       | 0.302974 (Hartree/Particle) |
| Sum of electronic and zero-point Energies=   | -862.452048                 |
| Sum of electronic and thermal Energies=      | -862.435887                 |
| Sum of electronic and thermal Enthalpies=    | -862.434943                 |
| Sum of electronic and thermal Free Energies= | -862.496745                 |

Electronic Energy SP (RPW6B95D3/def2-QZVPP)= -863.758782048 (Hartree/Particle)  
Corrected Free Energy= -863.500505016 (Hartree/Particle)

-----  
CONFORMER 10

CARTESIAN COORDINATES

|   |              |               |               |
|---|--------------|---------------|---------------|
| C | 0.5919450138 | -0.9976947148 | -0.0734712225 |
|---|--------------|---------------|---------------|

|   |               |               |               |
|---|---------------|---------------|---------------|
| C | -0.6199291896 | -0.3229290060 | 0.5556351357  |
| C | 0.3646251721  | 1.8297743468  | -0.2219929885 |
| H | 0.3448848726  | -1.2373486438 | -1.1224192991 |
| H | 0.7847249398  | -1.9556450442 | 0.4187467153  |
| H | 0.2715114584  | 2.8892094545  | -0.4593835529 |
| H | -0.4966317886 | -0.3182981297 | 1.6524752284  |
| C | -1.8983106372 | -1.0865314596 | 0.2172901369  |
| C | -2.8846928325 | 1.0317160281  | 1.1716577008  |
| C | -3.1851511088 | -0.4090464393 | 0.7490962062  |
| H | -1.8271889923 | -2.1102060744 | 0.5981048119  |
| H | -1.9474269302 | -1.1681086482 | -0.8773051622 |
| H | -2.4175939063 | 1.0390026418  | 2.1667236515  |
| H | -3.8041838368 | 1.6210834309  | 1.2420140021  |
| C | -0.7249408321 | 1.1173743169  | 0.1249966824  |
| N | -2.0180493345 | 1.6335494851  | 0.1652955228  |
| C | 1.8265264124  | -0.1462112258 | -0.0596216785 |
| C | 1.6965000701  | 1.2443766690  | -0.1902875412 |
| C | 3.1037280123  | -0.7184544014 | -0.0060784548 |
| C | 2.8454344236  | 2.0453628834  | -0.2666145545 |
| H | 2.7406663512  | 3.1239869920  | -0.3692517000 |
| C | 4.1019913975  | 1.4639013025  | -0.2025464636 |
| H | 4.9926642678  | 2.0874915928  | -0.2576431914 |
| C | 4.2458198436  | 0.0850203866  | -0.0679052612 |
| H | 5.2378853953  | -0.3534892154 | -0.0217099192 |
| H | -2.0580374022 | 2.6453870820  | 0.1307999755  |
| C | -4.2396901018 | -0.4326173553 | -0.3375095446 |
| O | -5.1960294225 | -1.1622936329 | -0.3458808890 |
| O | -4.0179292763 | 0.4193746297  | -1.3395046634 |
| H | -3.2227072077 | 0.9600772470  | -1.1277307288 |
| H | -3.5925524622 | -0.9599482960 | 1.6005741928  |
| O | 3.1461170811  | -2.0669476457 | 0.0943408765  |
| C | 4.3957726051  | -2.7023805680 | 0.1730132205  |
| H | 4.1992309776  | -3.7738237162 | 0.2603024787  |
| H | 4.9997627990  | -2.5208296354 | -0.7272111773 |
| H | 4.9649950712  | -2.3690747398 | 1.0523116131  |

Electronic Energy (RPW6B95D3/def2-SVP)= -862.761008961 (Hartree/Particle)

Dipole Moment= 6.2361 (Debye)

Number of imaginary frequencies 0

THERMOCHEMICAL DATA (Temperature 298.150 Kelvin. Pressure 1.00000 Atm)

Zero-point correction= 0.303546 (Hartree/Particle)

Sum of electronic and zero-point Energies= -862.457463

Sum of electronic and thermal Energies= -862.441677

Sum of electronic and thermal Enthalpies= -862.440733

Sum of electronic and thermal Free Energies= -862.500751

Electronic Energy SP (RPW6B95D3/def2-QZVPP)= -863.765363088 (Hartree/Particle)

Corrected Free Energy= -863.505105127 (Hartree/Particle)

-----  
CONFORMER 11

CARTESIAN COORDINATES

|   |               |               |               |
|---|---------------|---------------|---------------|
| C | 0.5989621306  | -0.7784056458 | -0.3601506999 |
| C | -0.5931466407 | -0.0995107262 | 0.2984391175  |
| C | 0.5802133180  | 2.0327869905  | -0.1727121454 |
| H | 0.4105337827  | -0.8214100632 | -1.4472203075 |
| H | 0.6741778703  | -1.8156224067 | -0.0191266515 |
| H | 0.5830791509  | 3.1161916576  | -0.2934703224 |
| H | -0.4881149030 | -0.1867006873 | 1.3940720215  |
| C | -1.8957960949 | -0.7855050900 | -0.0913664516 |
| C | -3.0659794730 | 1.3999244198  | -0.1756939378 |
| C | -3.1024080419 | 0.0031665506  | 0.4113544008  |

|   |               |               |               |
|---|---------------|---------------|---------------|
| H | -1.8833813231 | -1.8103213962 | 0.3016032219  |
| H | -1.9555944737 | -0.8694366864 | -1.1862601359 |
| H | -3.8688911355 | 2.0087304017  | 0.2516024791  |
| H | -3.2642696815 | 1.3278185476  | -1.2586370480 |
| C | -0.5983325272 | 1.3831545634  | 0.0090957886  |
| N | -1.7987397653 | 2.0311590467  | 0.1081331542  |
| C | 1.8865611832  | -0.0514389050 | -0.1222975241 |
| C | 1.8575841336  | 1.3519435595  | -0.0780078797 |
| C | 3.1089177059  | -0.7264478600 | -0.0265416975 |
| C | 3.0633627606  | 2.0605116052  | 0.0540184923  |
| H | 3.0441463845  | 3.1486616477  | 0.0842515259  |
| C | 4.2643076230  | 1.3768290615  | 0.1549111454  |
| H | 5.1957494576  | 1.9304122444  | 0.2631474656  |
| C | 4.3036653937  | -0.0159952785 | 0.1226476497  |
| H | 5.2546178987  | -0.5333637063 | 0.2035129547  |
| H | -1.7676869854 | 3.0234408820  | -0.0808519147 |
| C | -4.4186156814 | -0.6688389845 | 0.0925236030  |
| O | -5.3116984821 | -0.1459109591 | -0.5180691407 |
| O | -4.5611556465 | -1.9206271127 | 0.5372509067  |
| H | -3.7815464767 | -2.2098518527 | 1.0270327278  |
| H | -3.0371476523 | 0.0737585141  | 1.5090246197  |
| O | 3.0500023406  | -2.0775653791 | -0.1006278735 |
| C | 4.2402253755  | -2.8136007043 | 0.0062354141  |
| H | 3.9663519690  | -3.8690201051 | -0.0686069208 |
| H | 4.9432047052  | -2.5676112147 | -0.8023314513 |
| H | 4.7393094599  | -2.6402428406 | 0.9702973160  |

Electronic Energy (RPW6B95D3/def2-SVP)= -862.758885210 (Hartree/Particle)

Dipole Moment= 3.5278 (Debye)

Number of imaginary frequencies 0

THERMOCHEMICAL DATA (Temperature 298.150 Kelvin. Pressure 1.00000 Atm)

Zero-point correction= 0.302320 (Hartree/Particle)

Sum of electronic and zero-point Energies= -862.456565

Sum of electronic and thermal Energies= -862.440228

Sum of electronic and thermal Enthalpies= -862.439284

Sum of electronic and thermal Free Energies= -862.500907

Electronic Energy SP (RPW6B95D3/def2-QZVPP)= -863.763497846 (Hartree/Particle)

Corrected Free Energy= -863.505519636 (Hartree/Particle)

-----
